# Supplementary material
Source: PubMed Central journal article supplement (PMC2596613)

## **A Dinuclear Zinc Catalyzed Asymmetric Alkynylation of Unsaturated Aldehydes**

Barry M. Trost,\* Andrew H. Weiss, Axel Jacobi von Wangelin  
*Department of Chemistry, Stanford University, Stanford, California 94305-8080*  
[bmtrost@stanford.edu](mailto:bmtrost@stanford.edu)

### **Supporting Information**

#### **Part B: NMR Spectra**

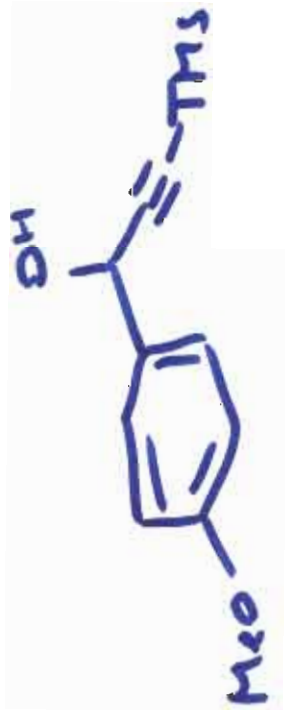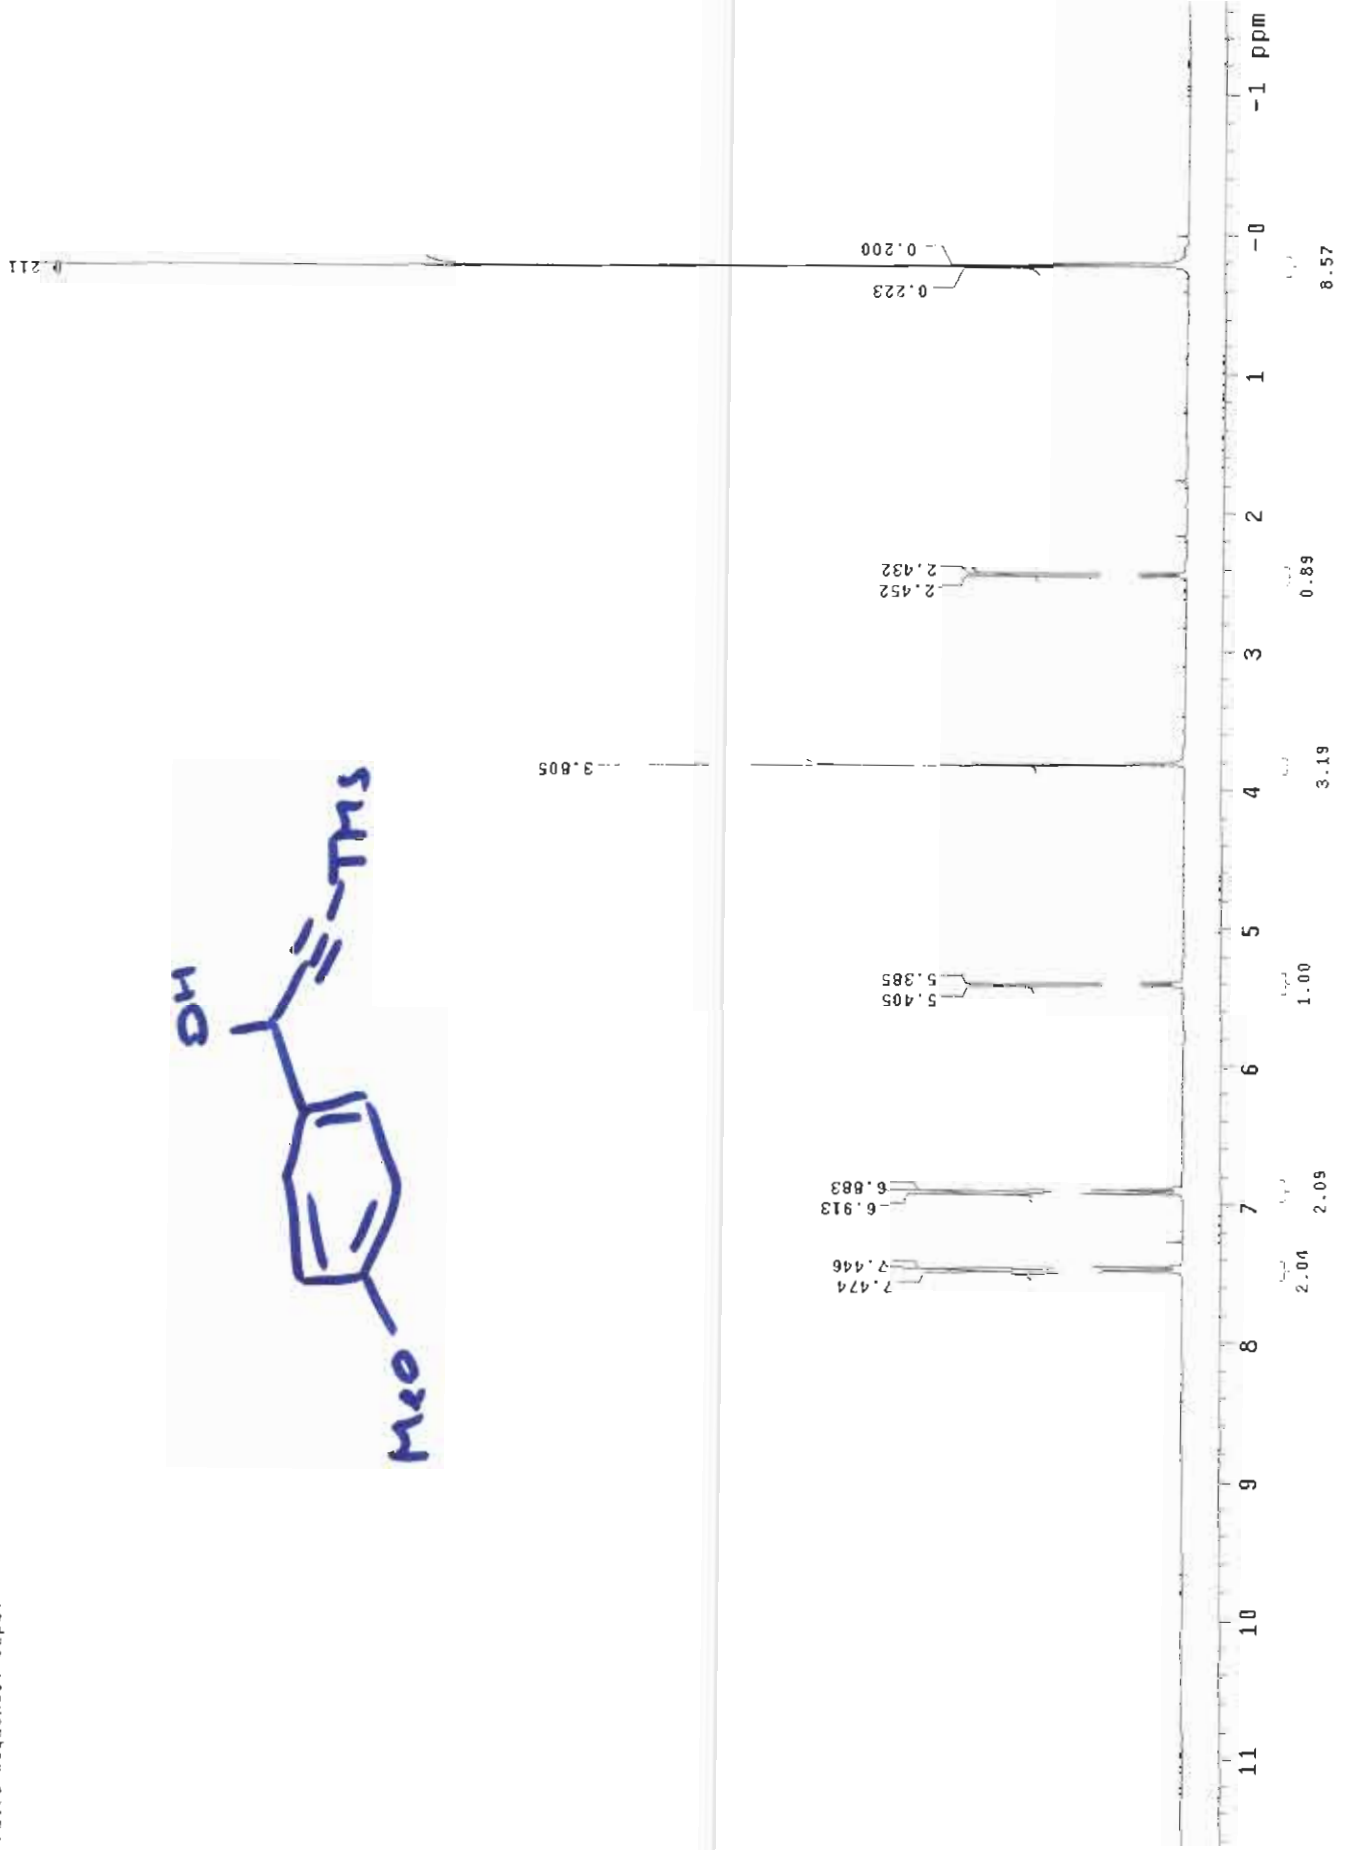

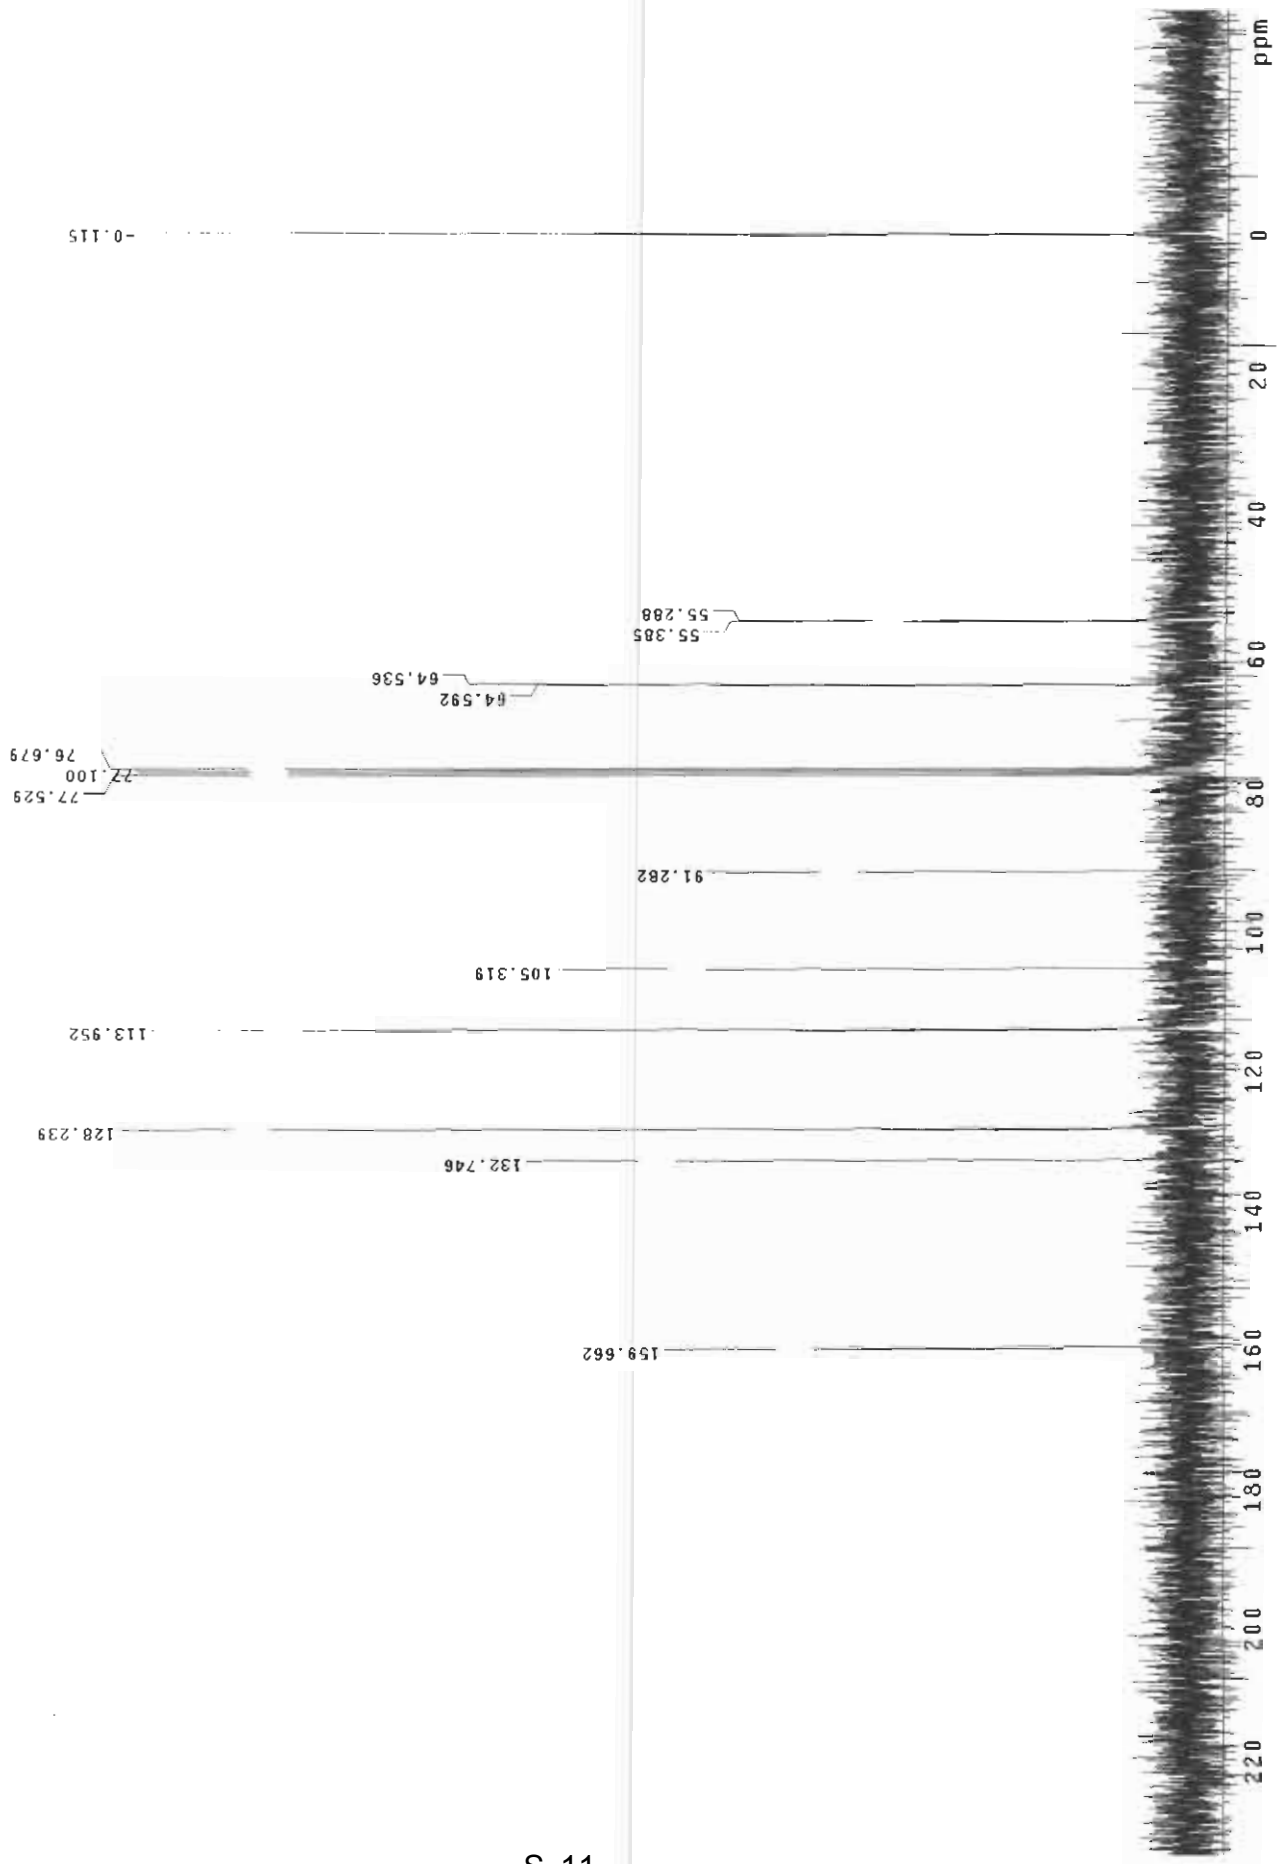

d3-156-1-1

Pulse Sequence: s2pul

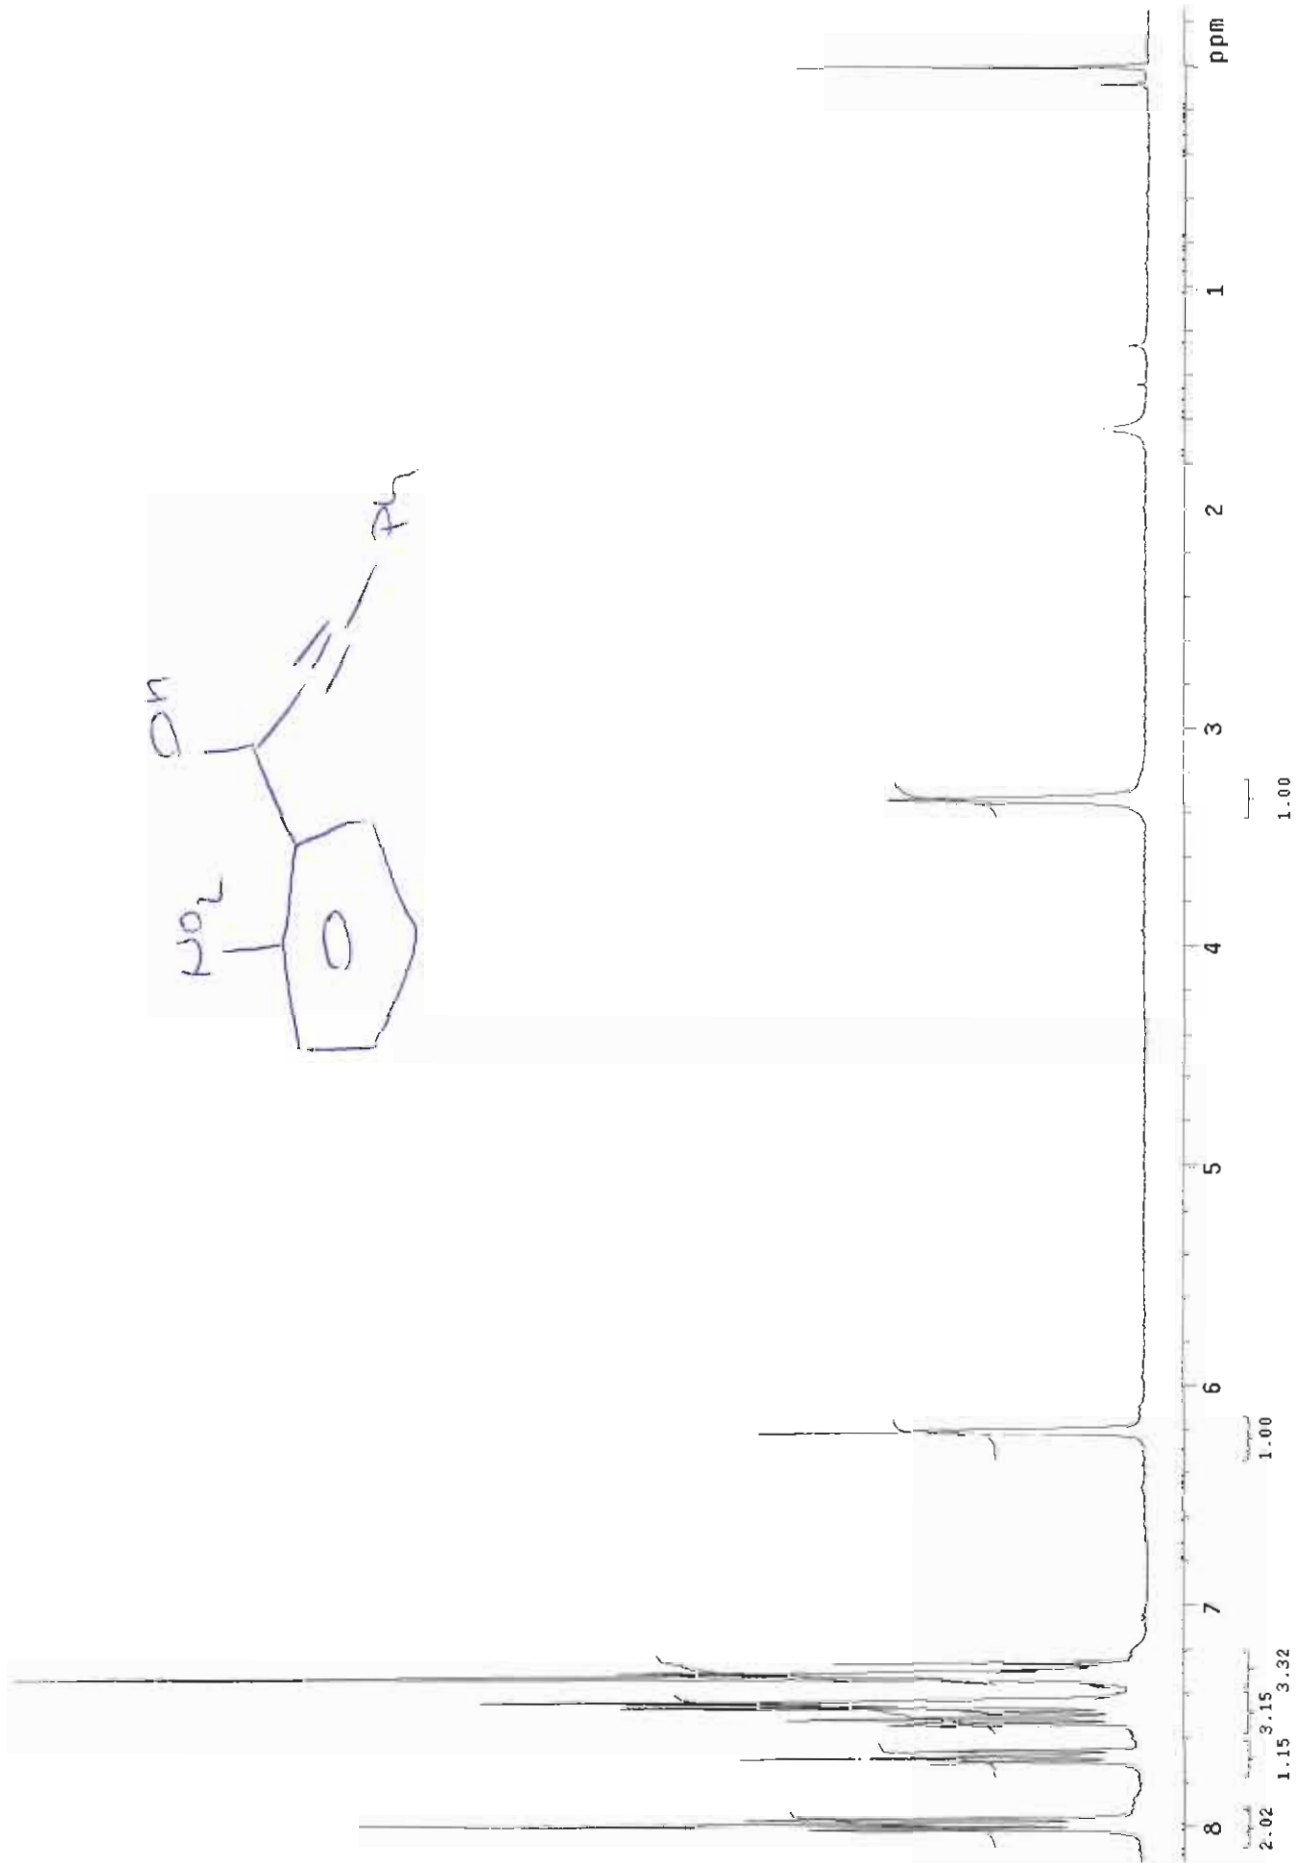

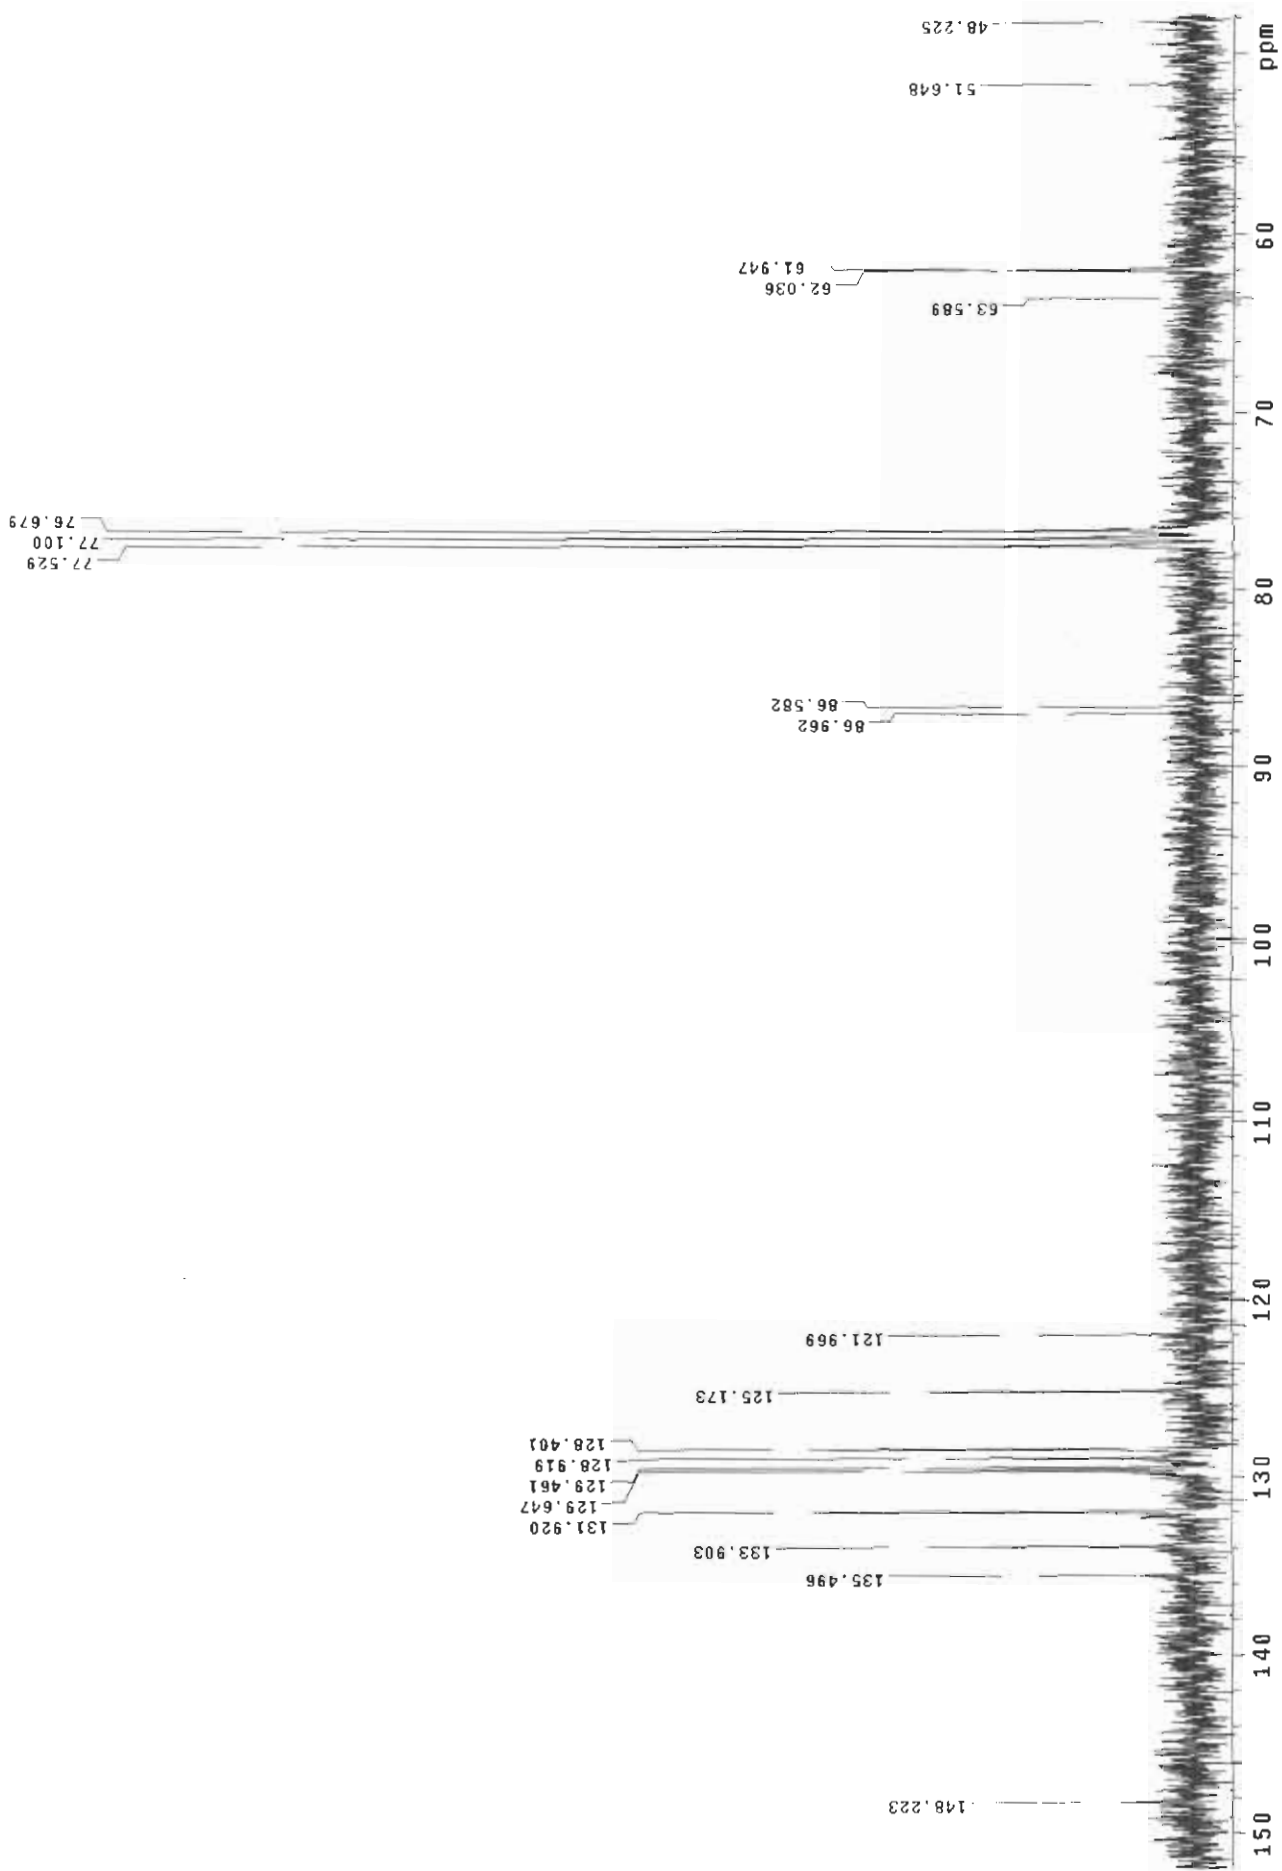

05-161

Pulse Sequence: s2pul

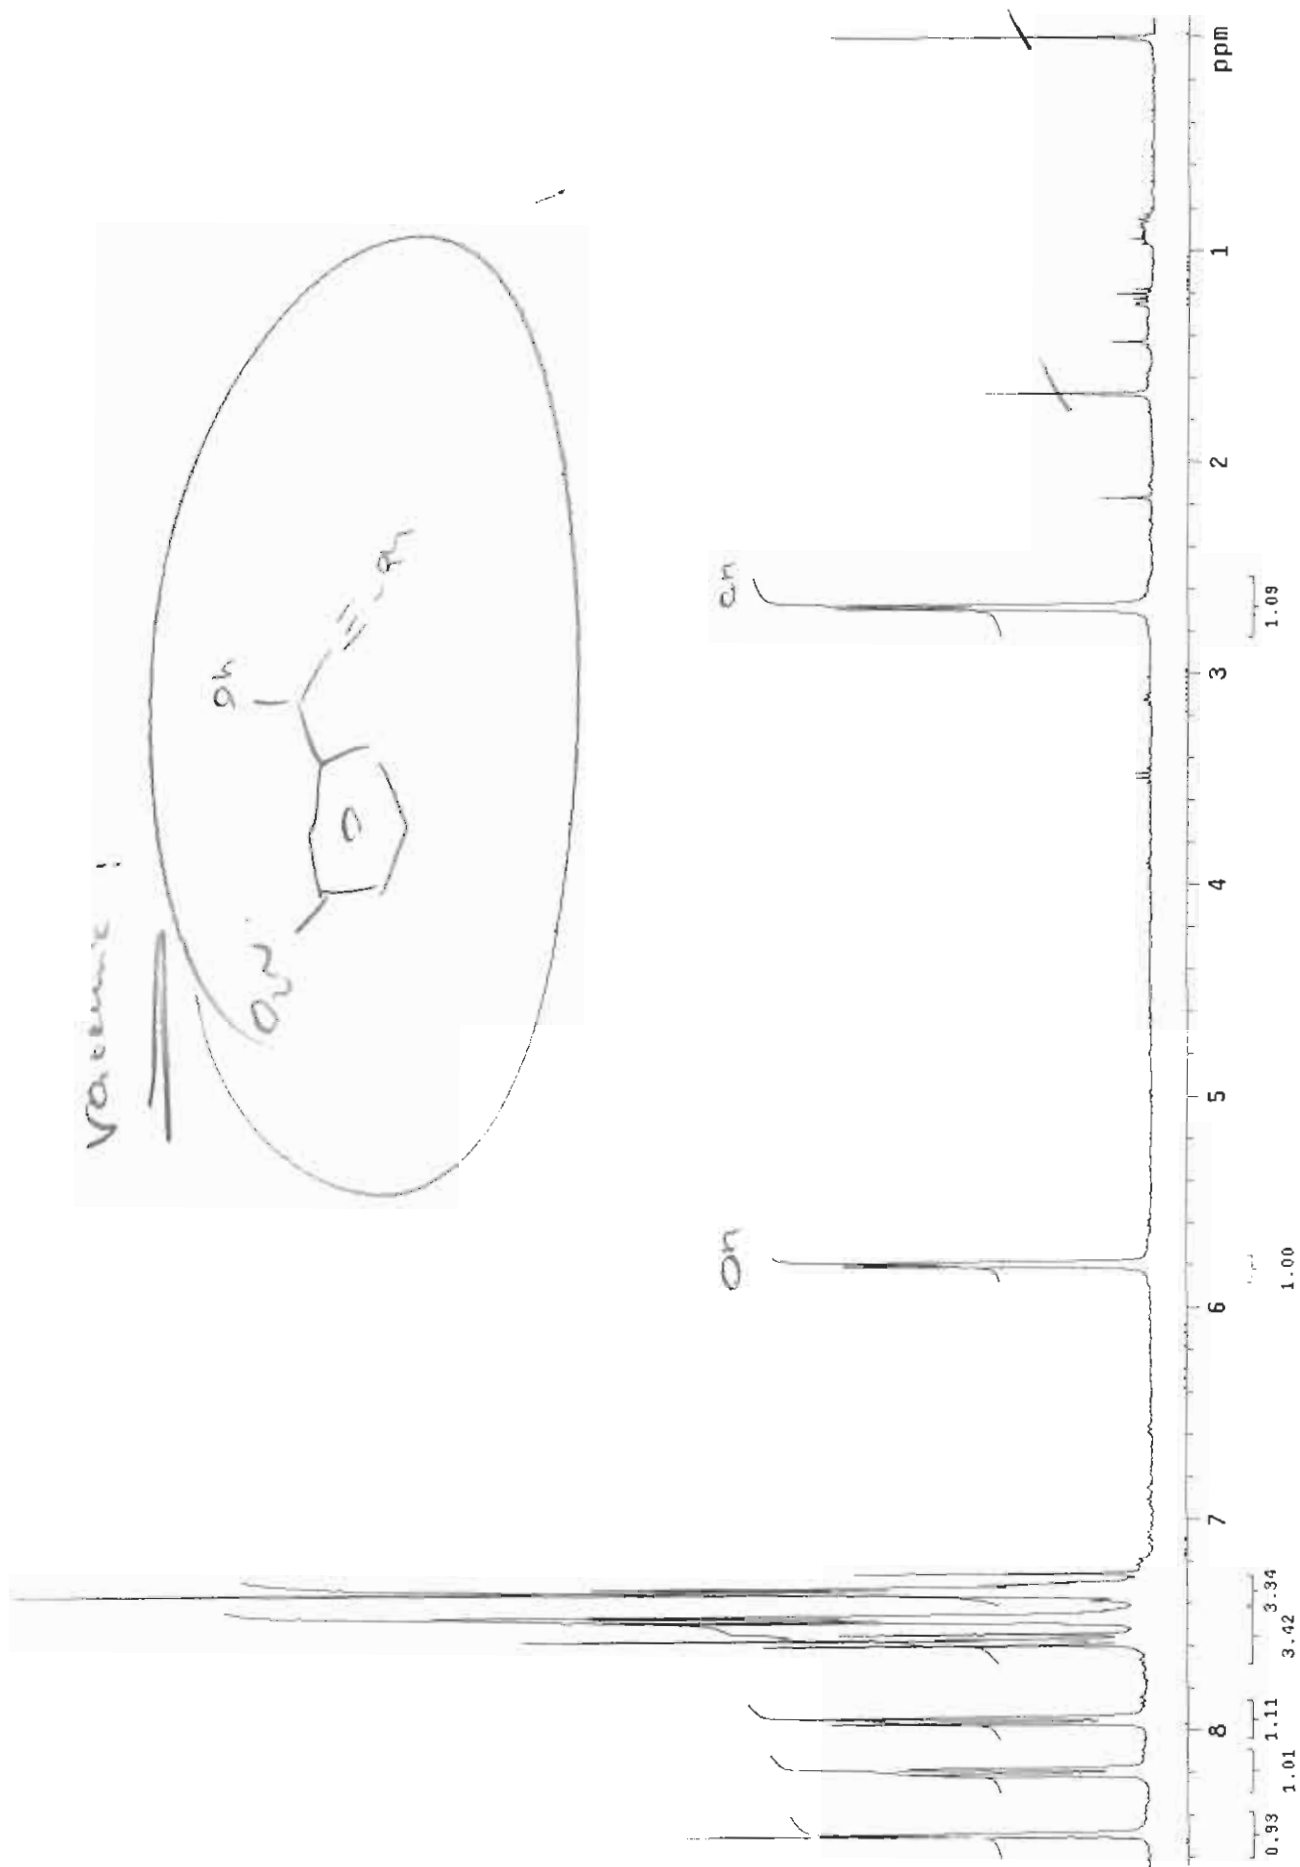

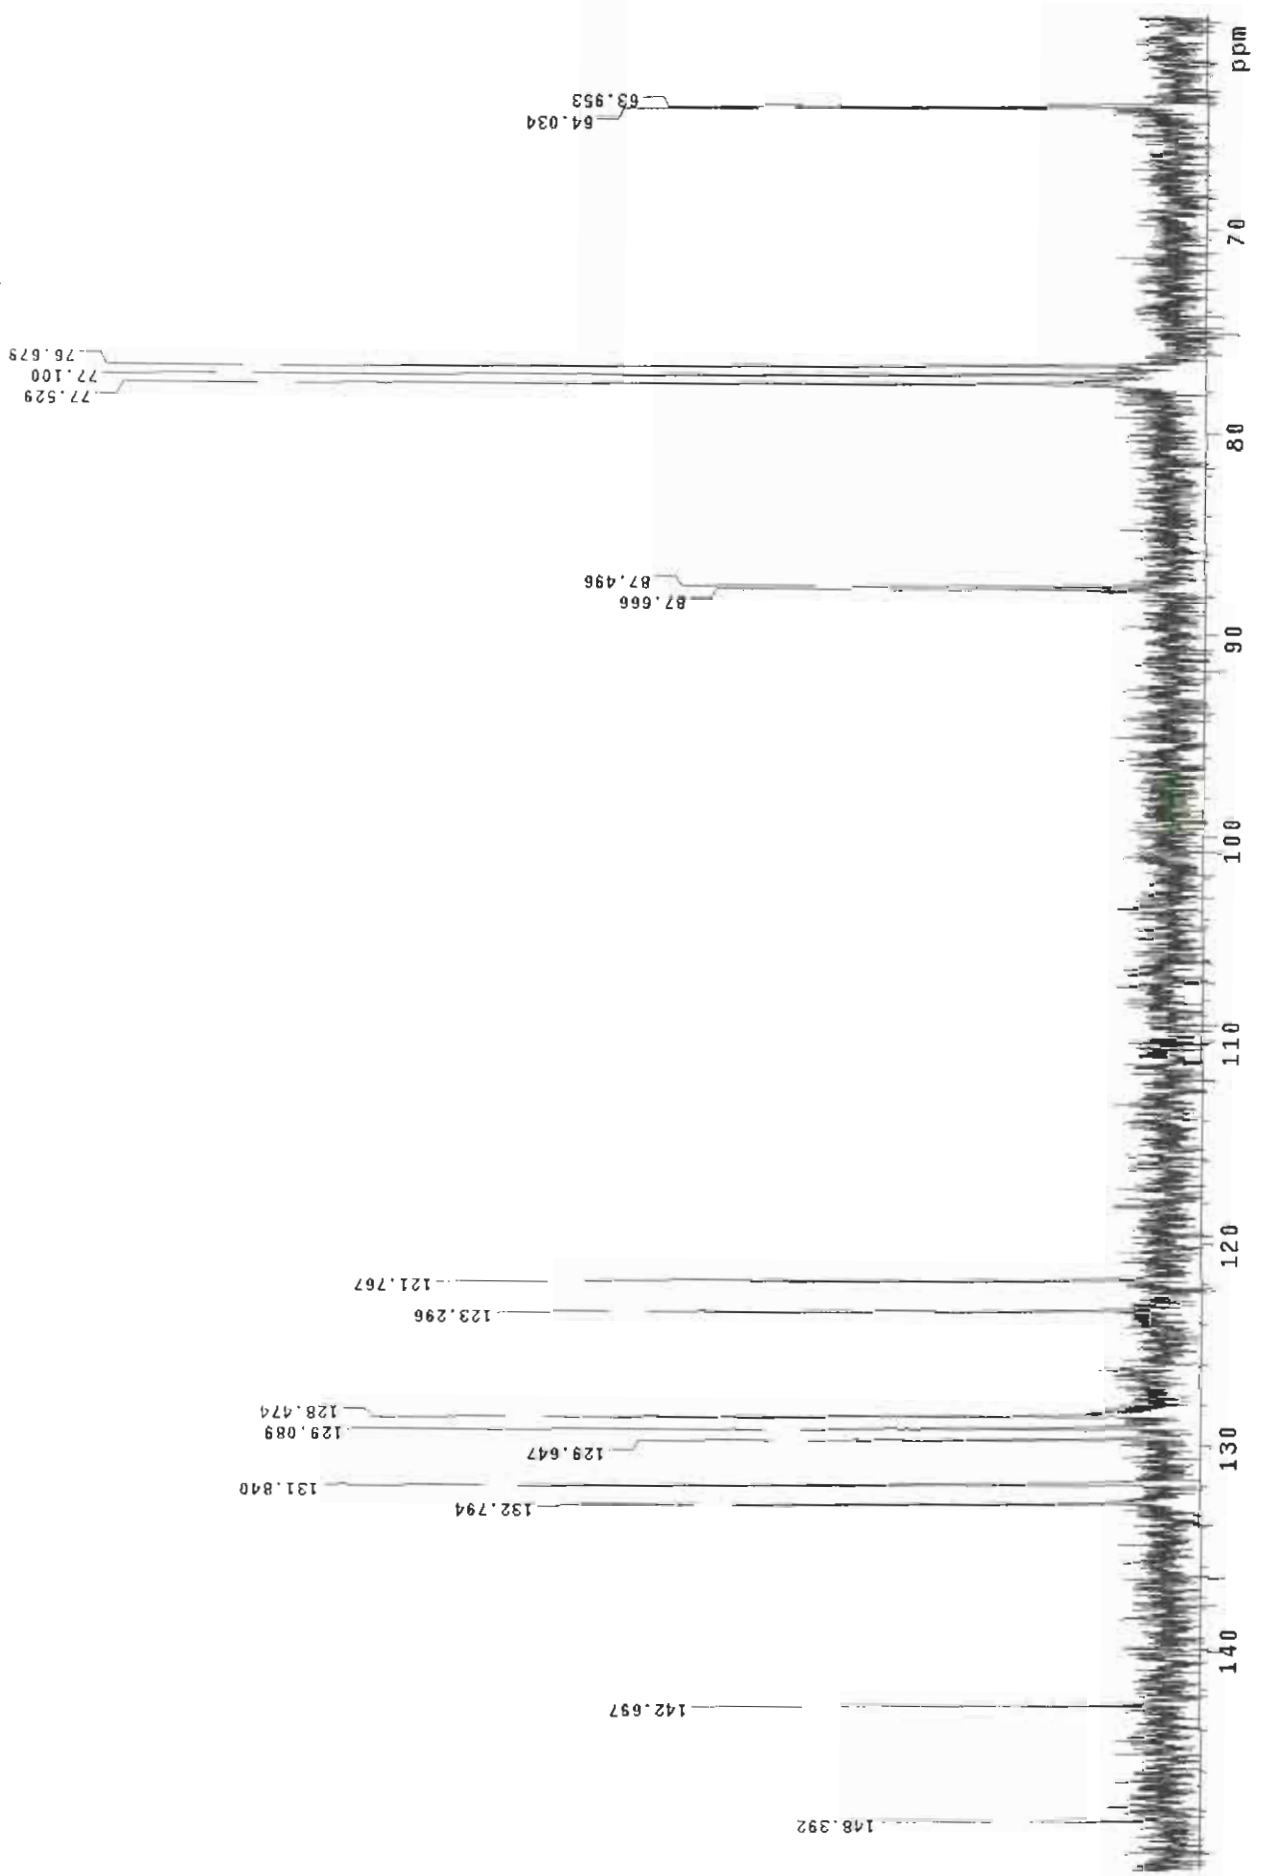

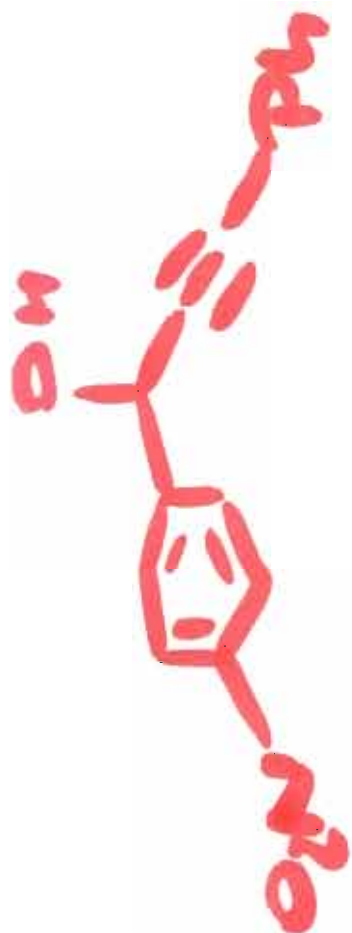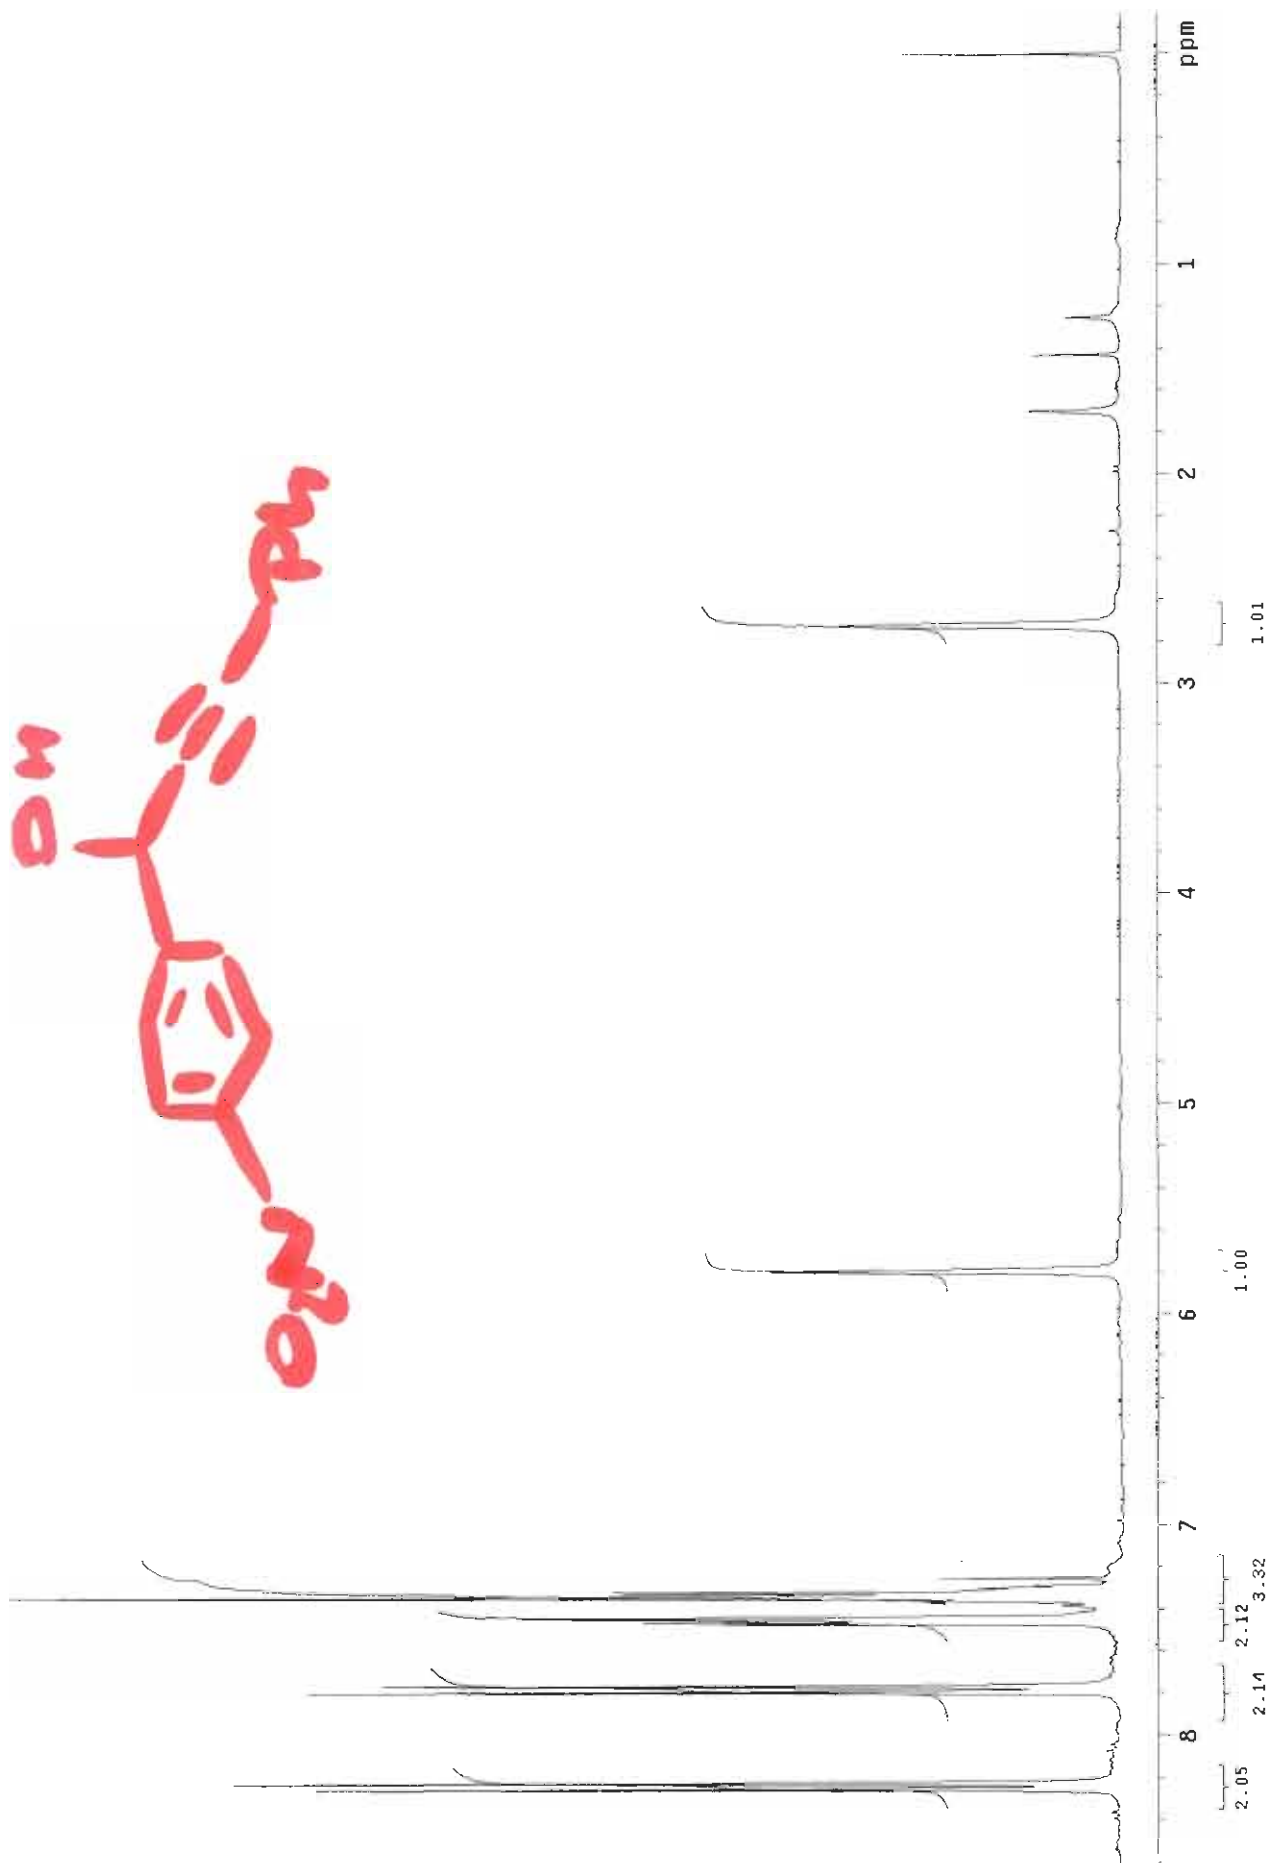



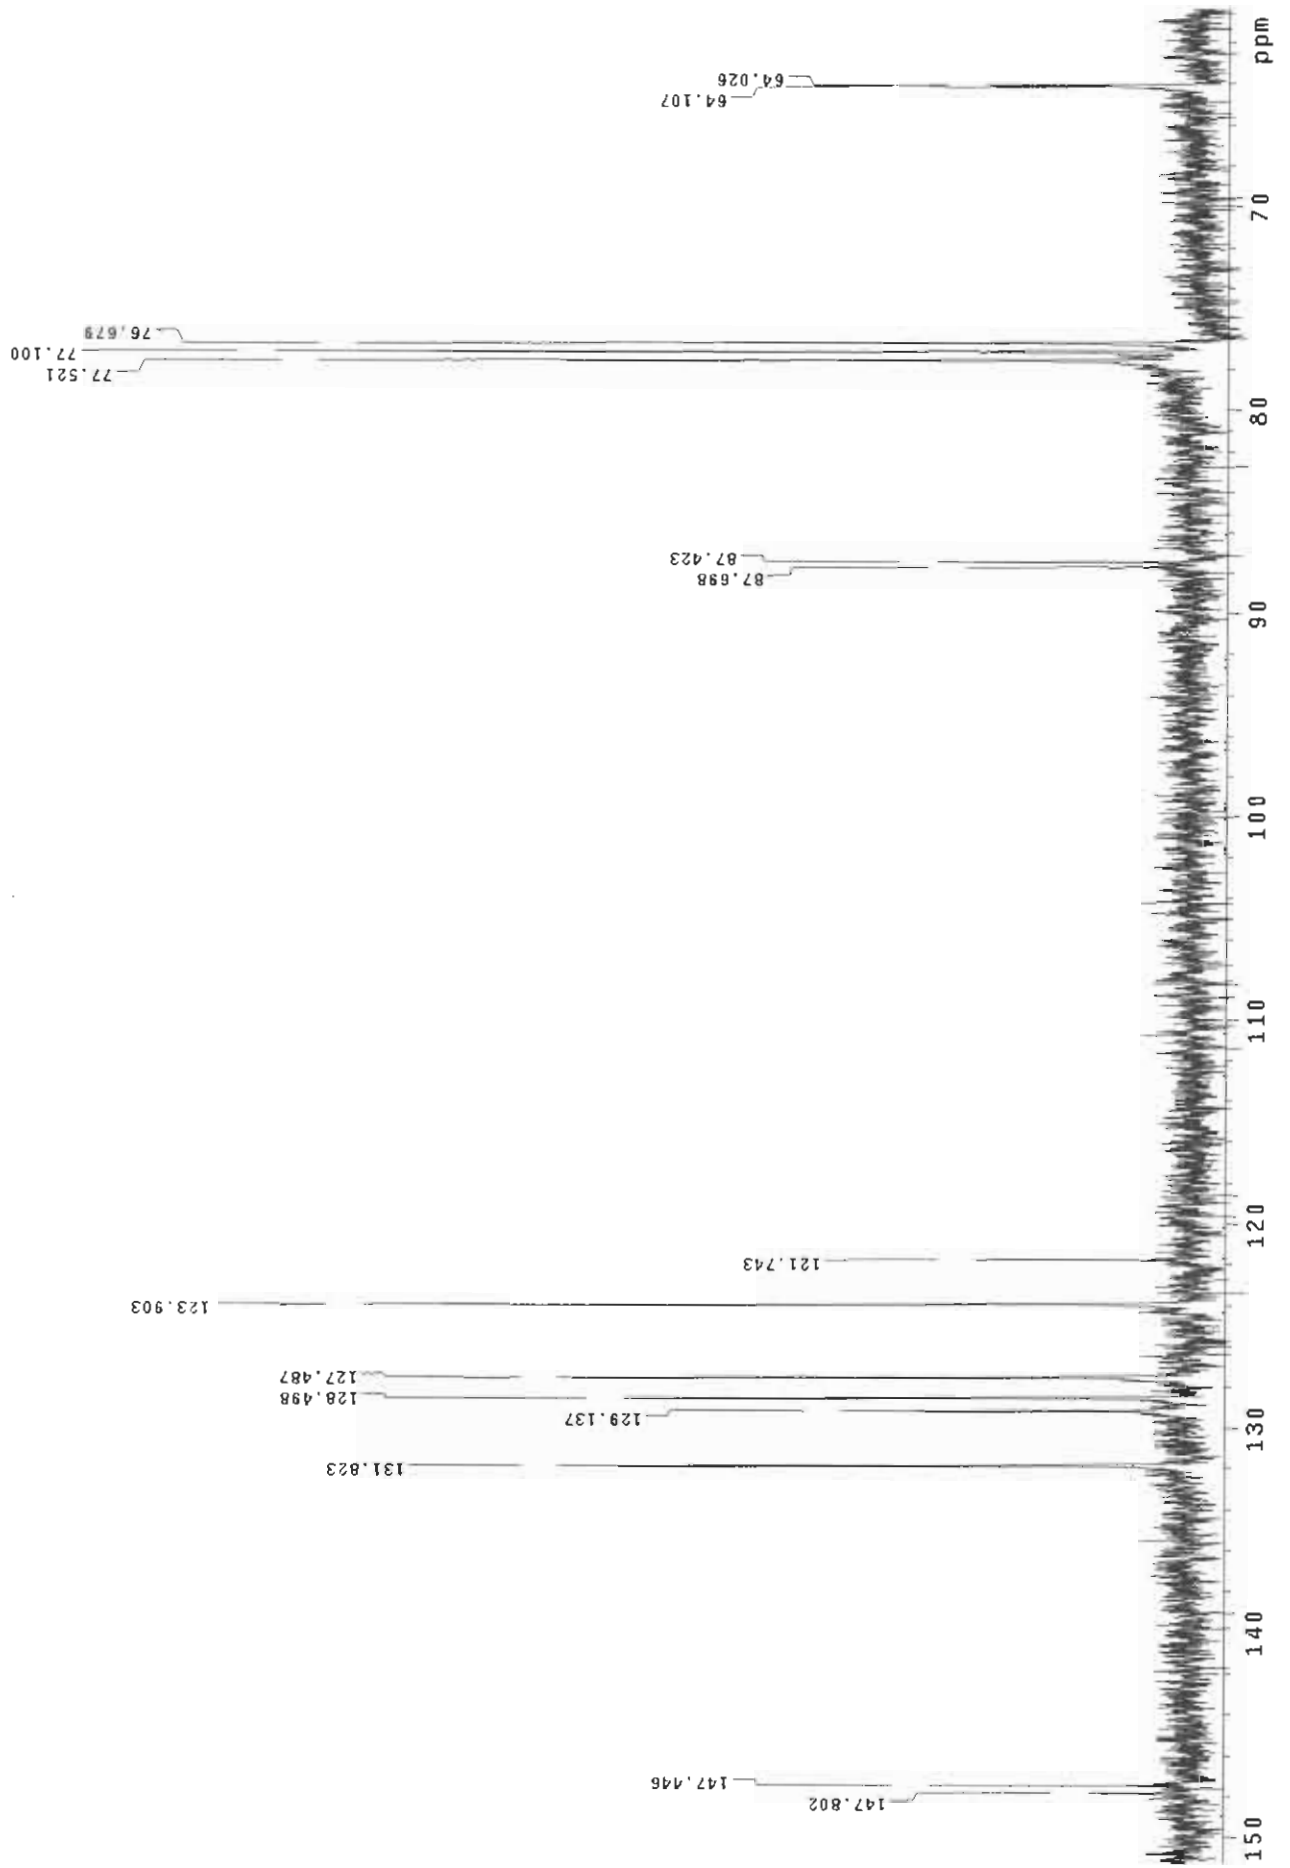

d3-162-1

Pulse Sequence: s2pul

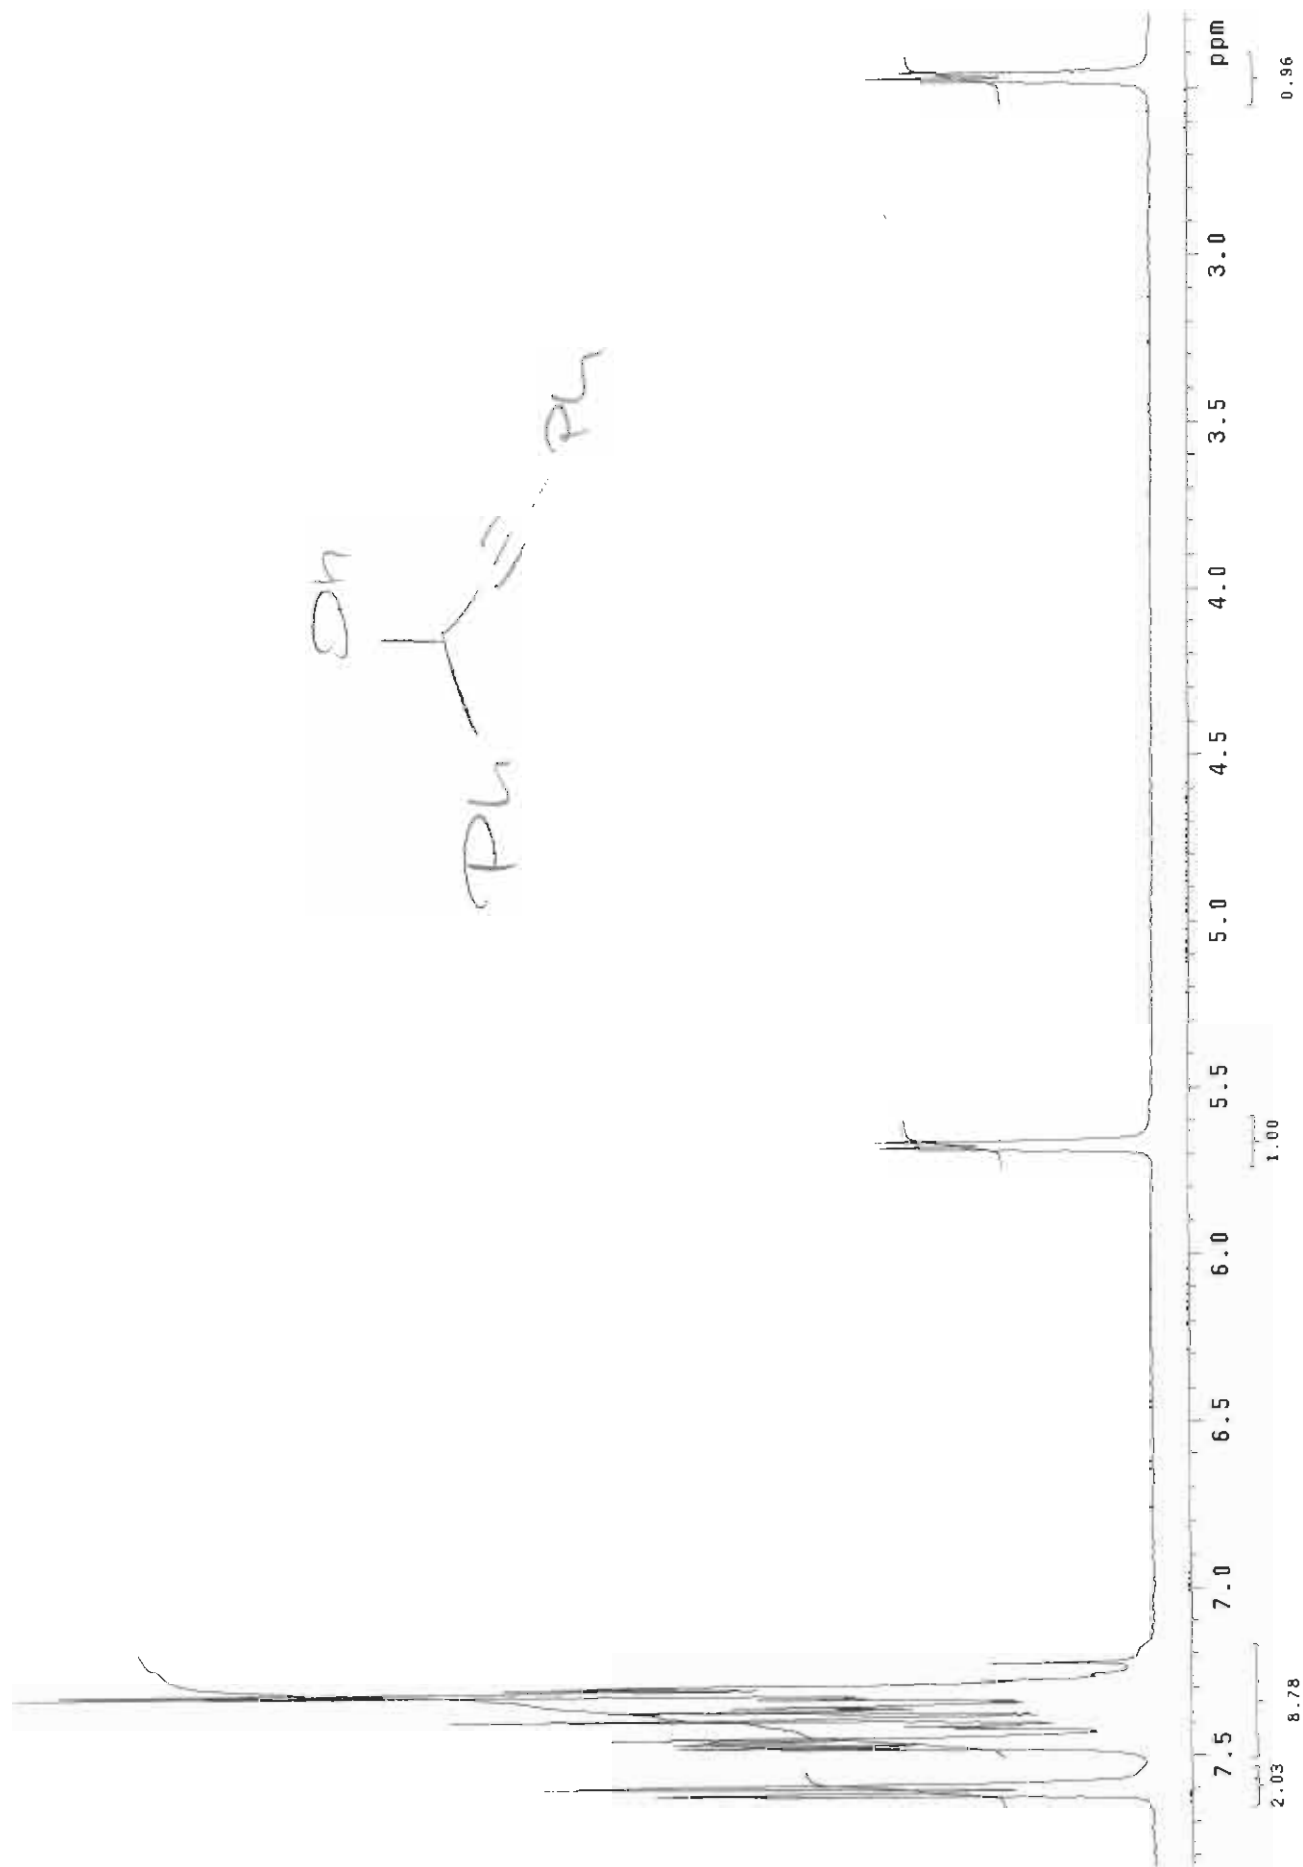

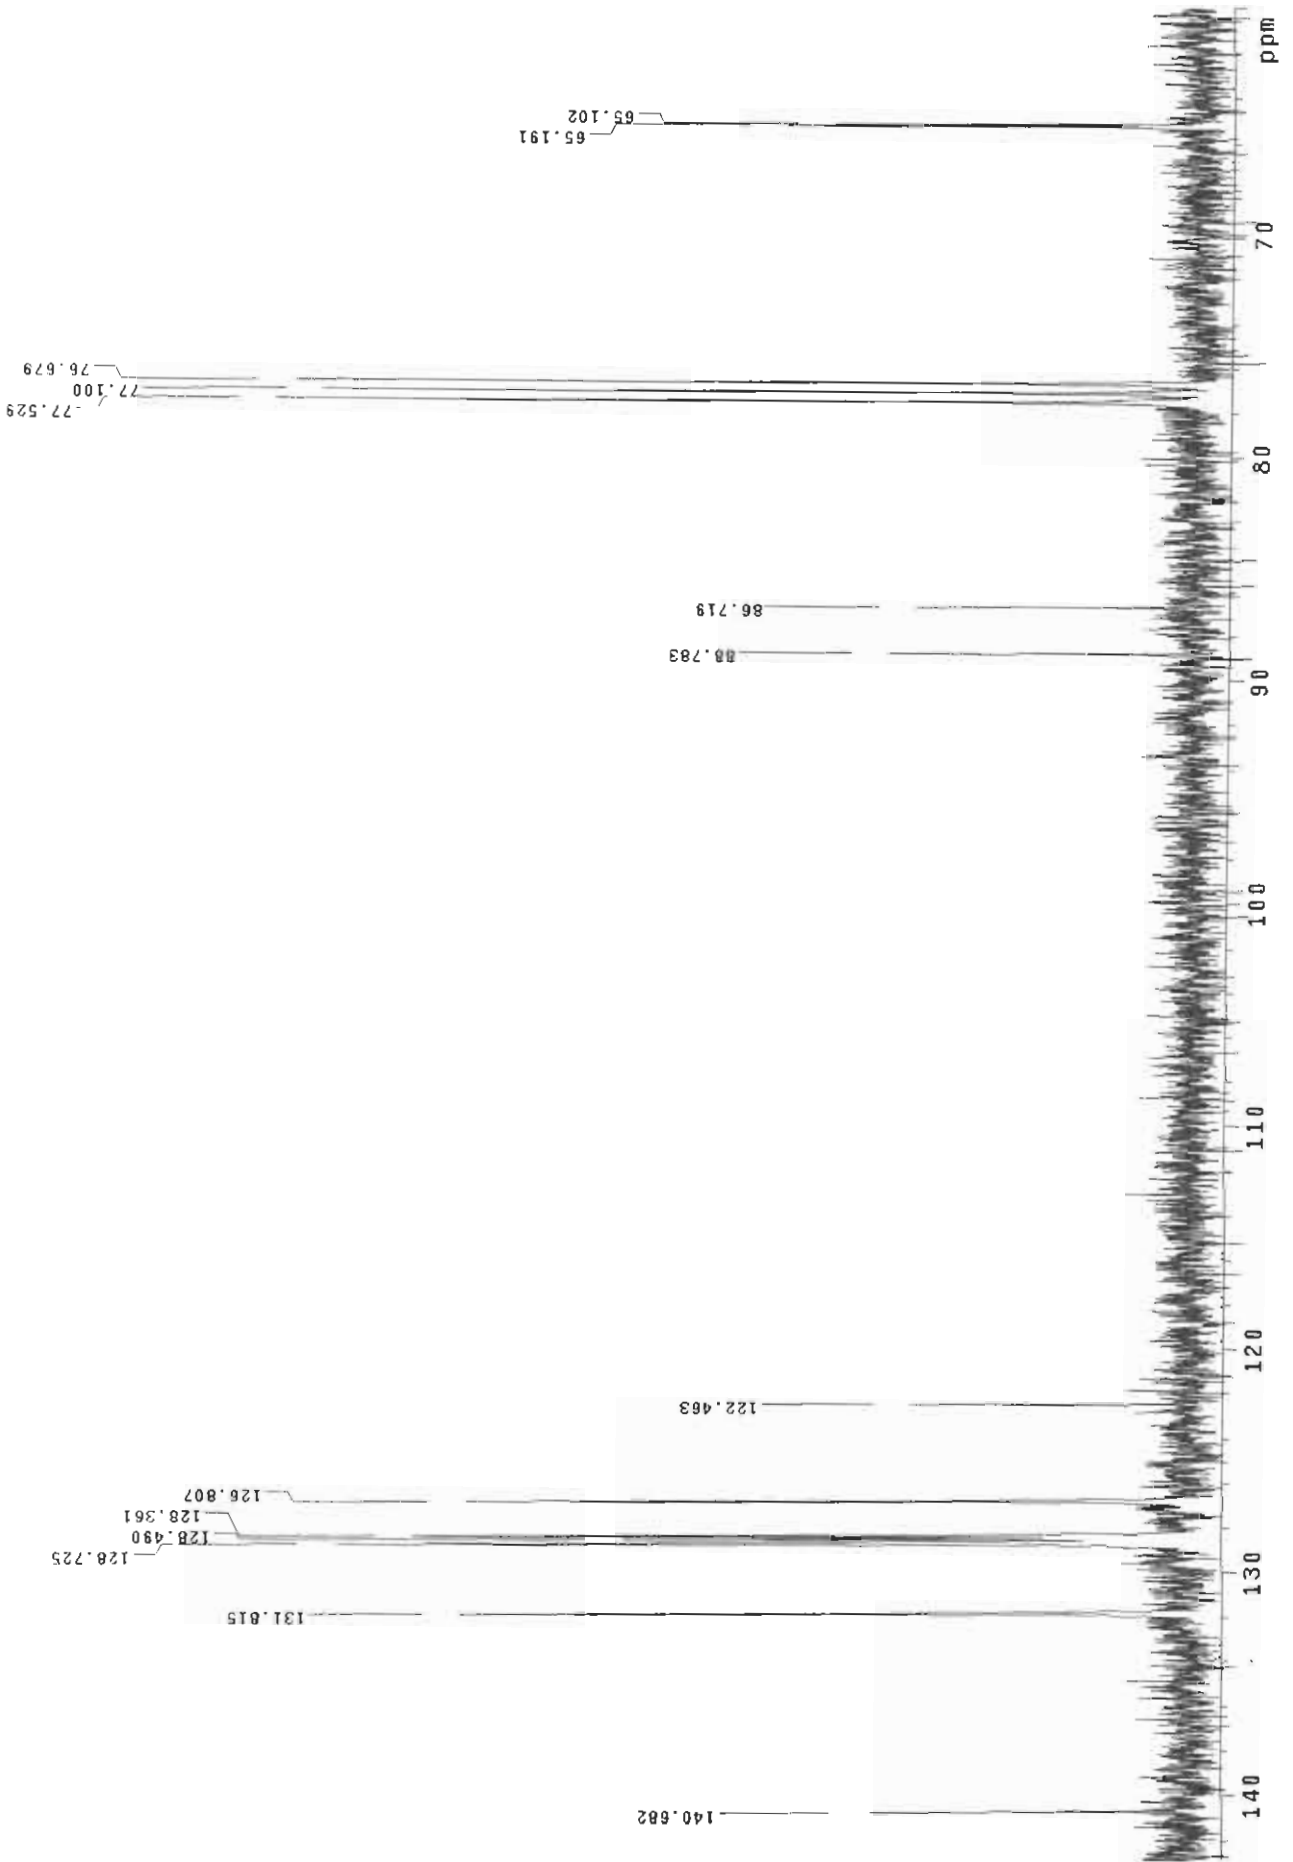

03-174-1

Pulse Sequence: s2pu1

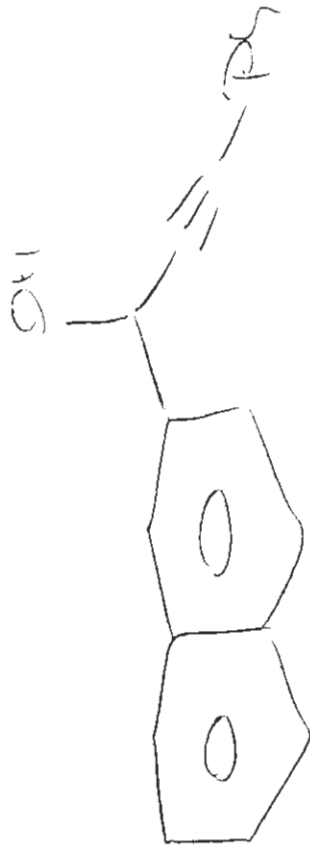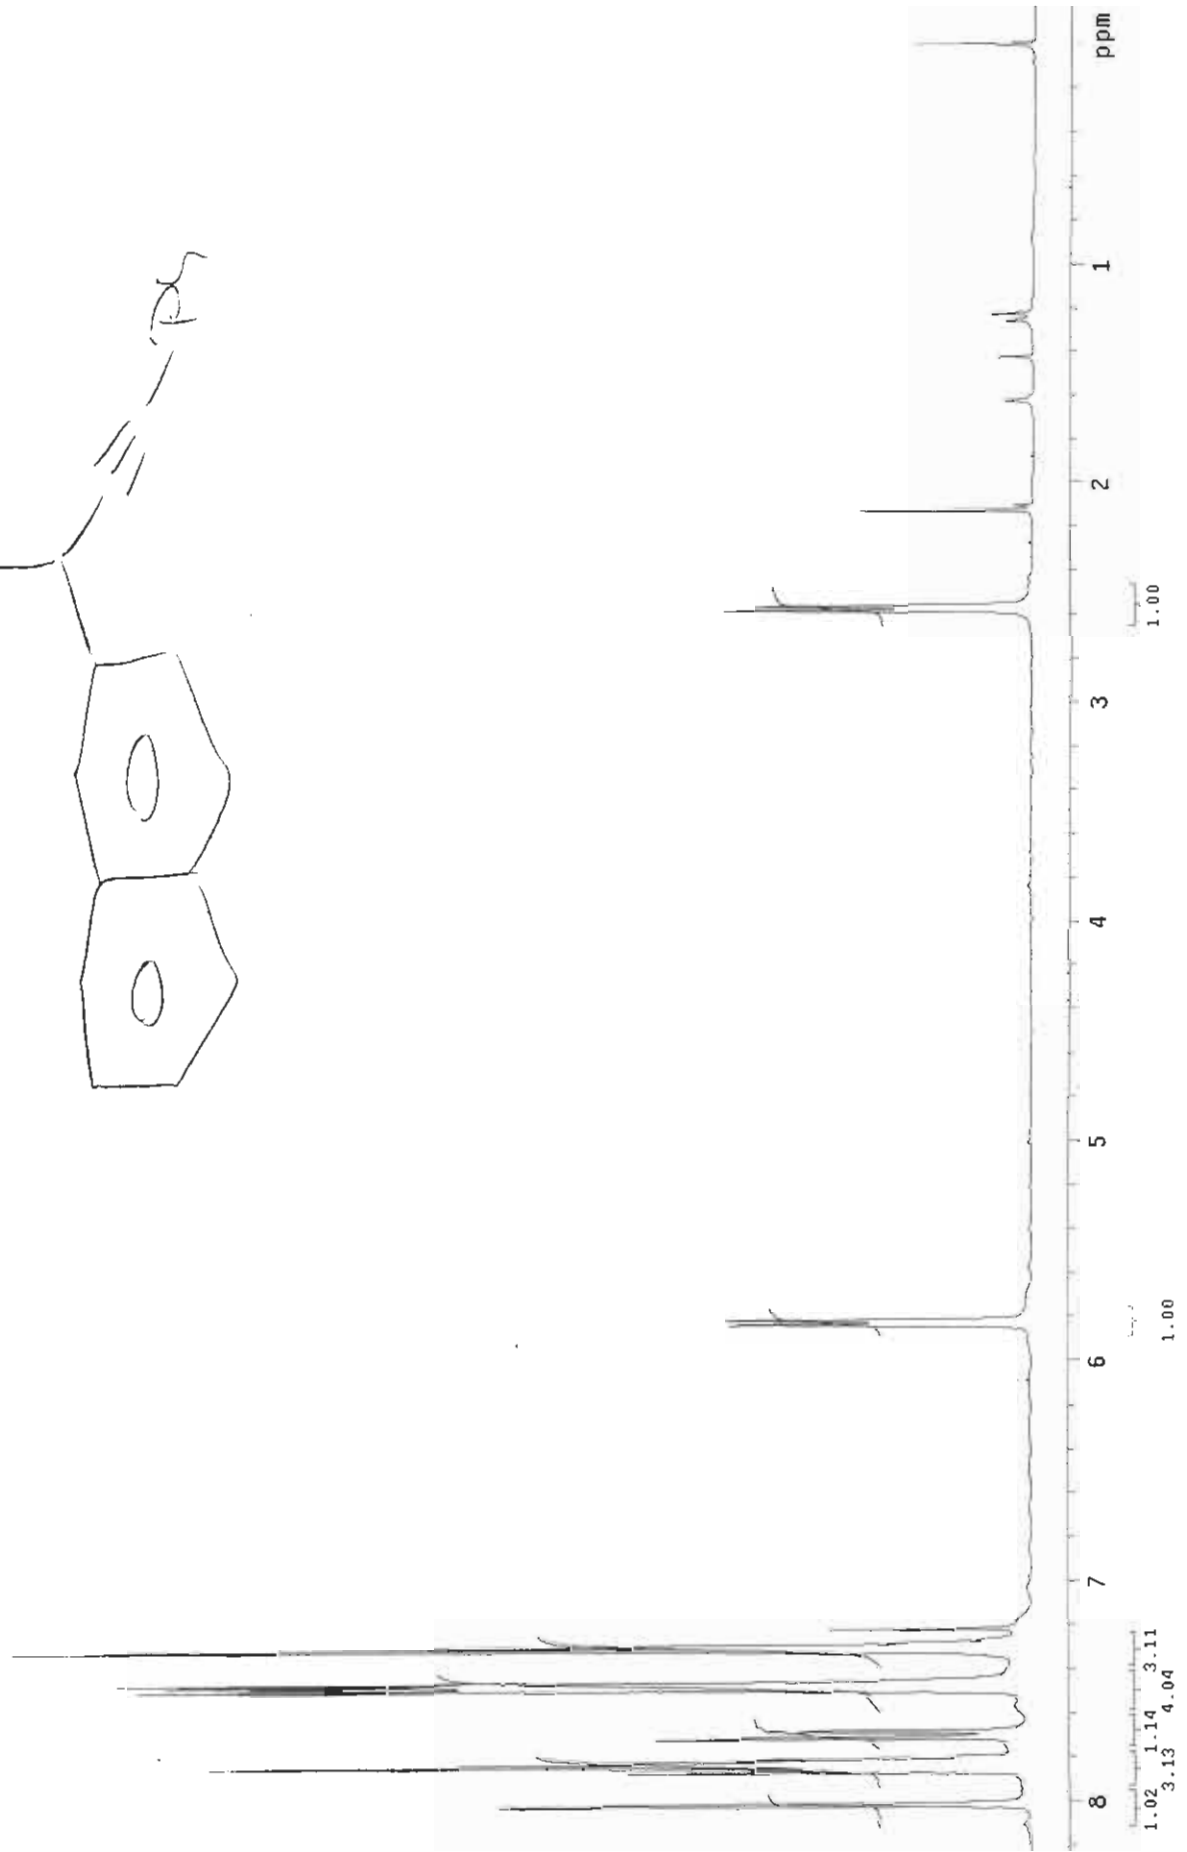

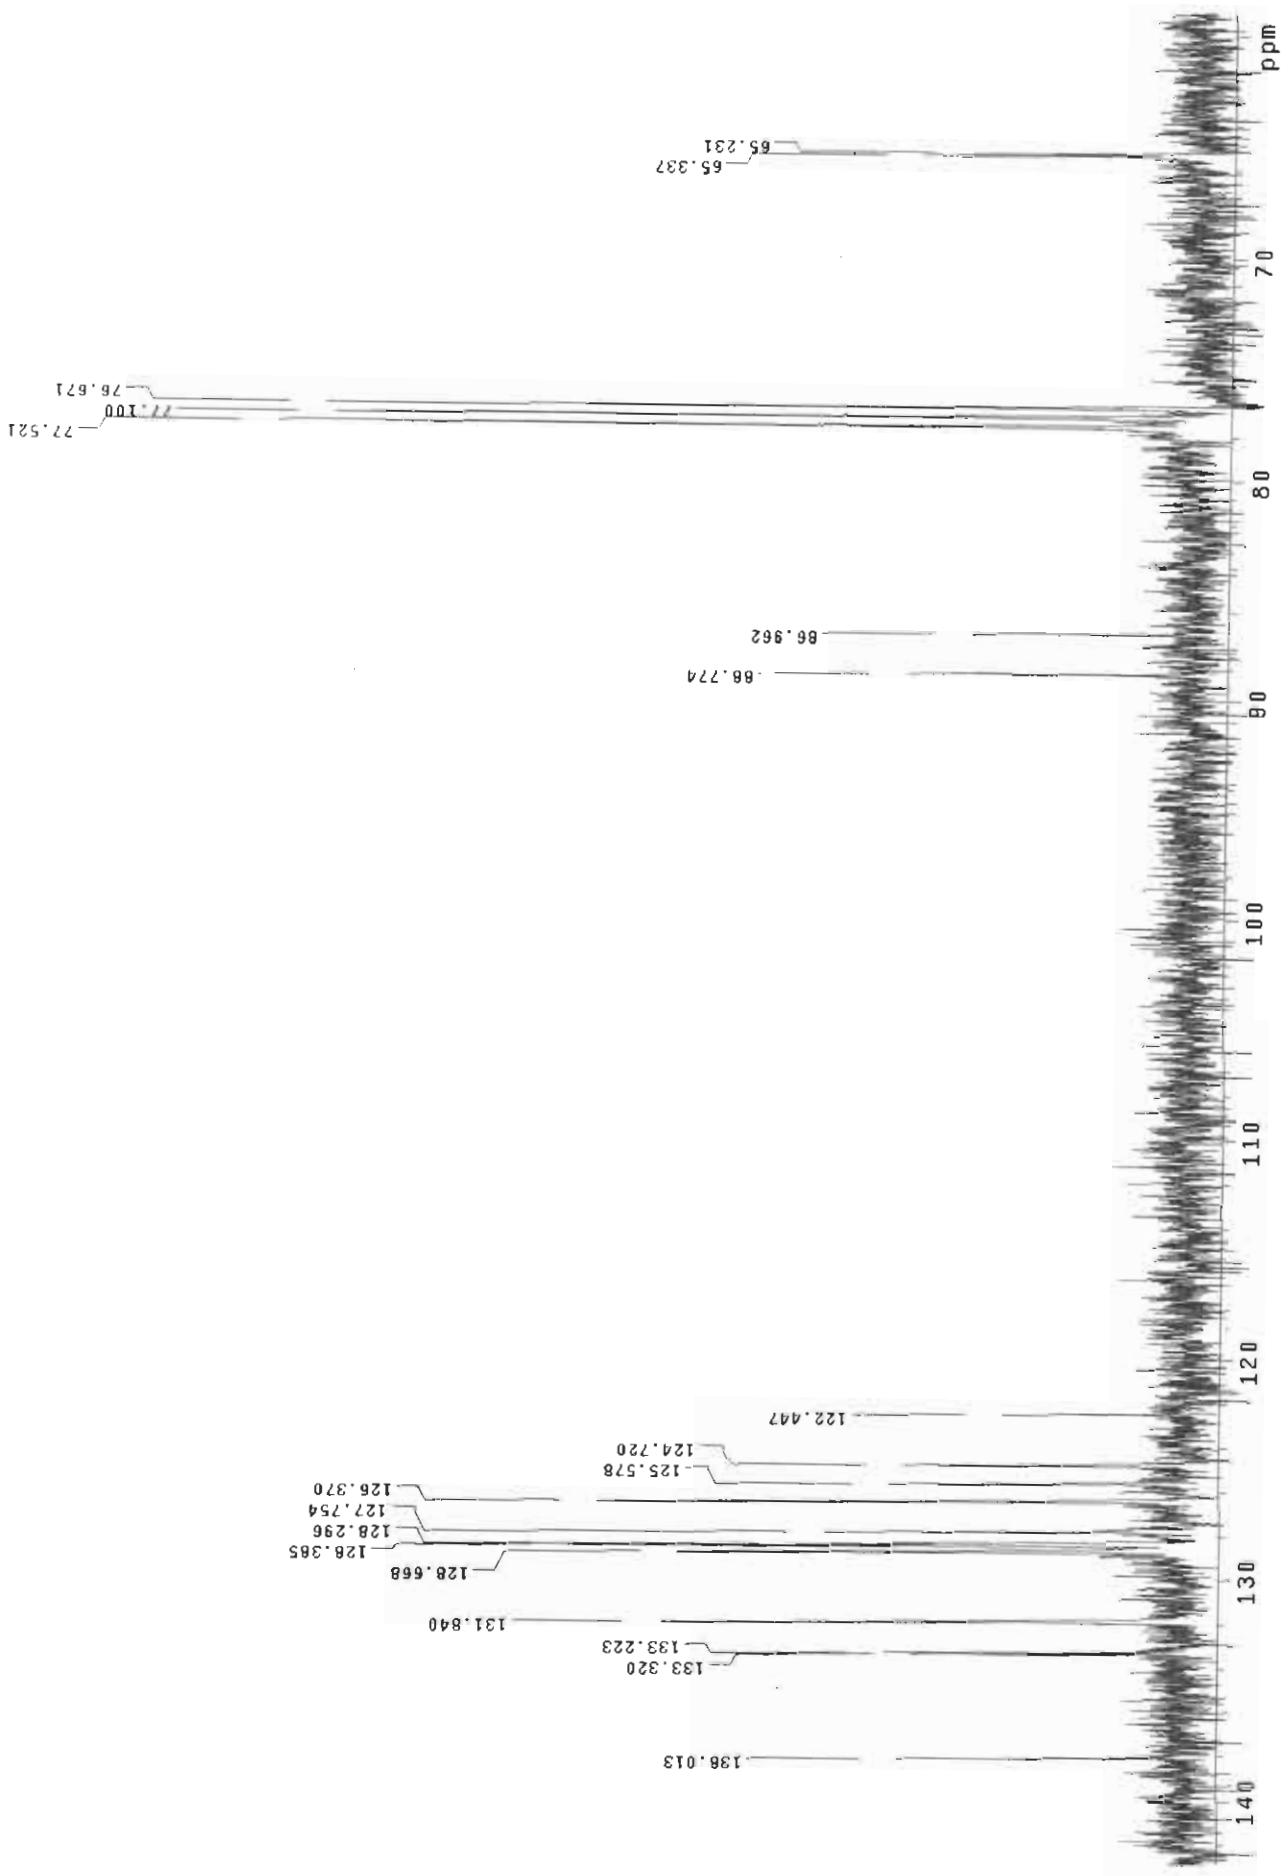

u3-157-2

Pulse Sequence: szpu1

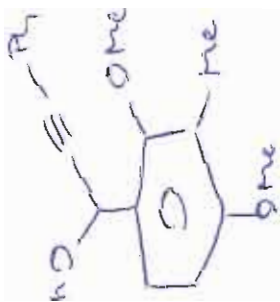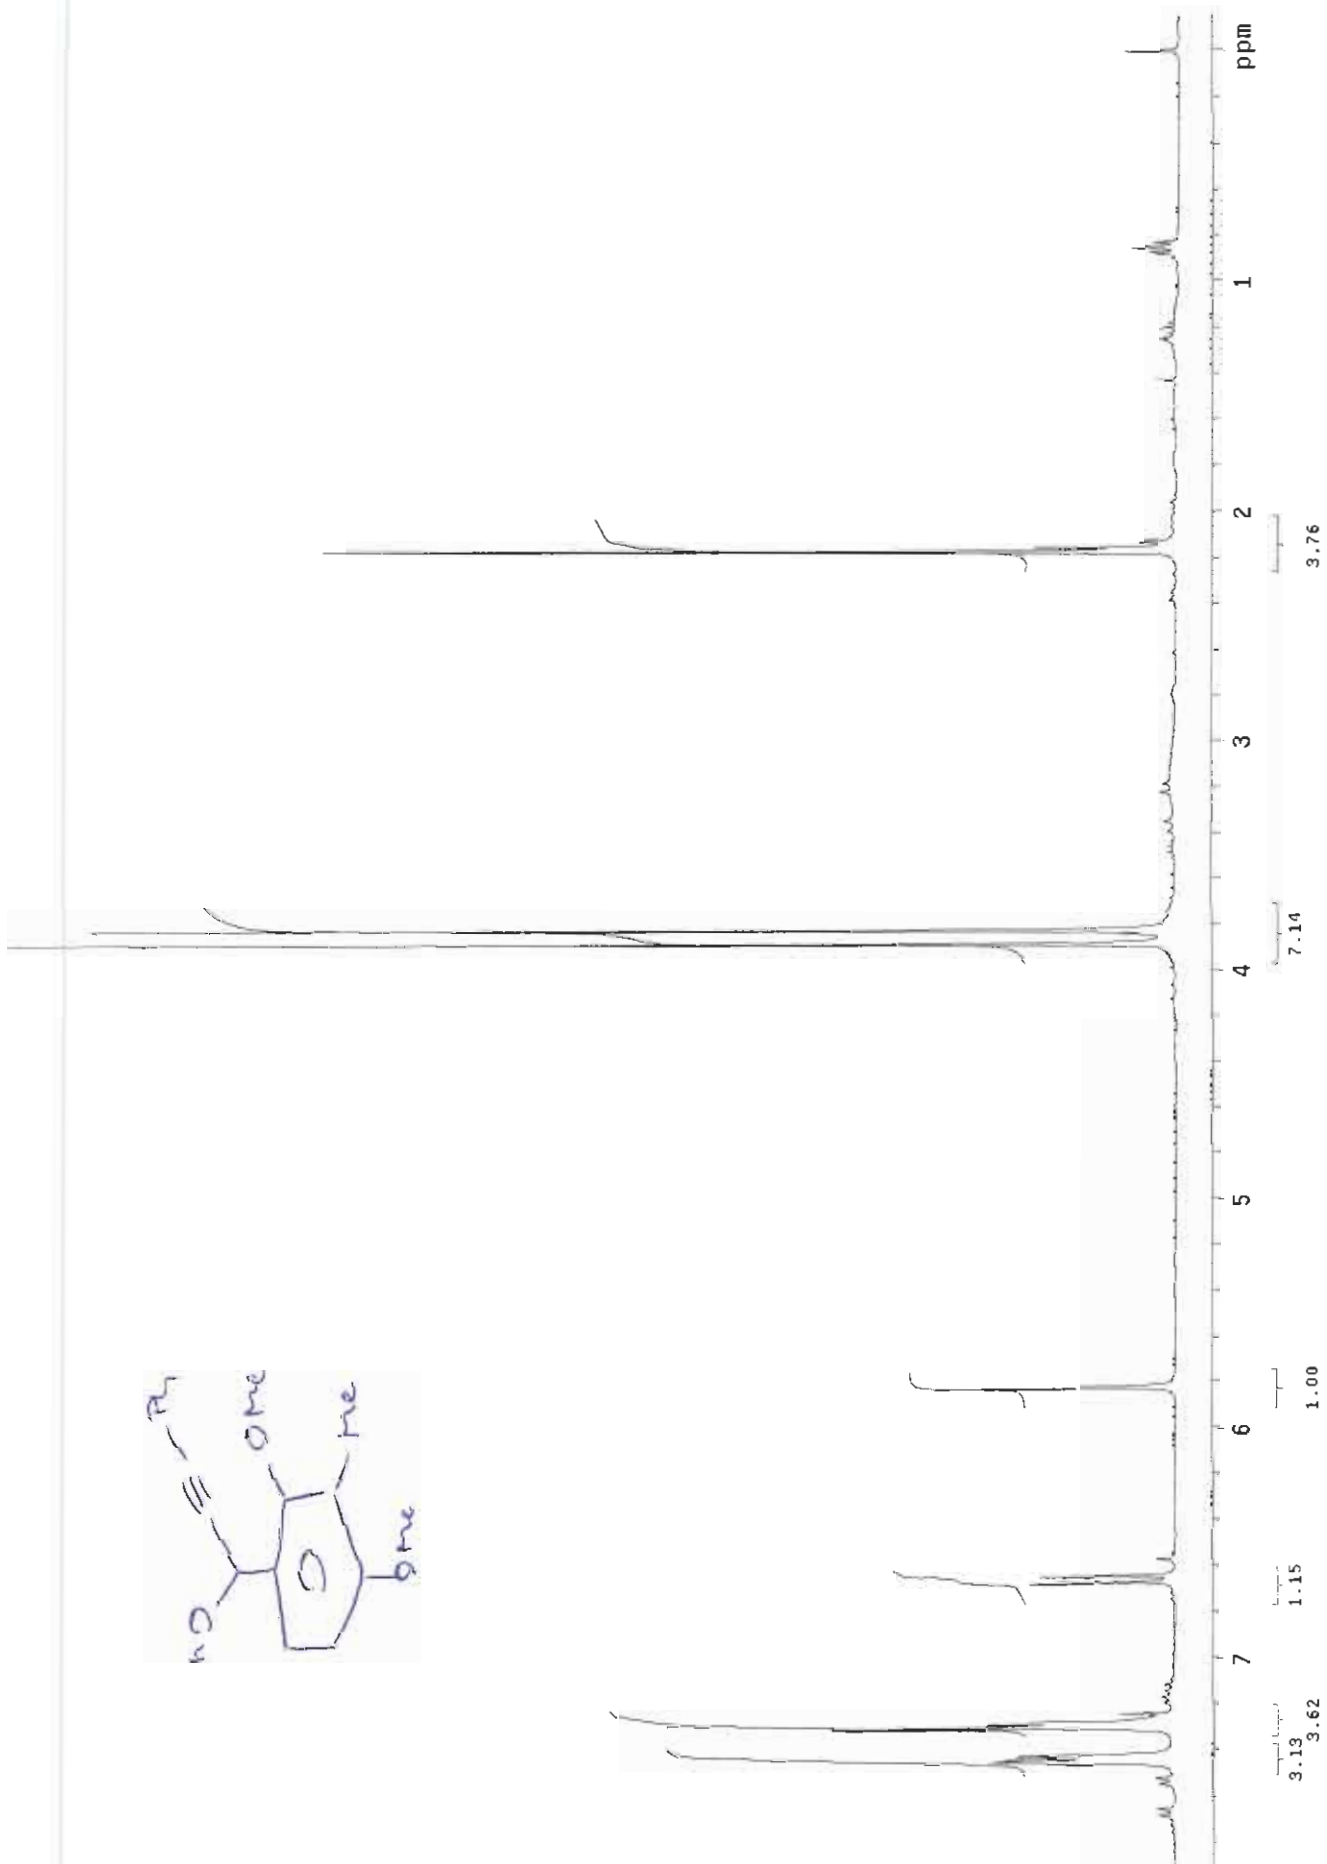

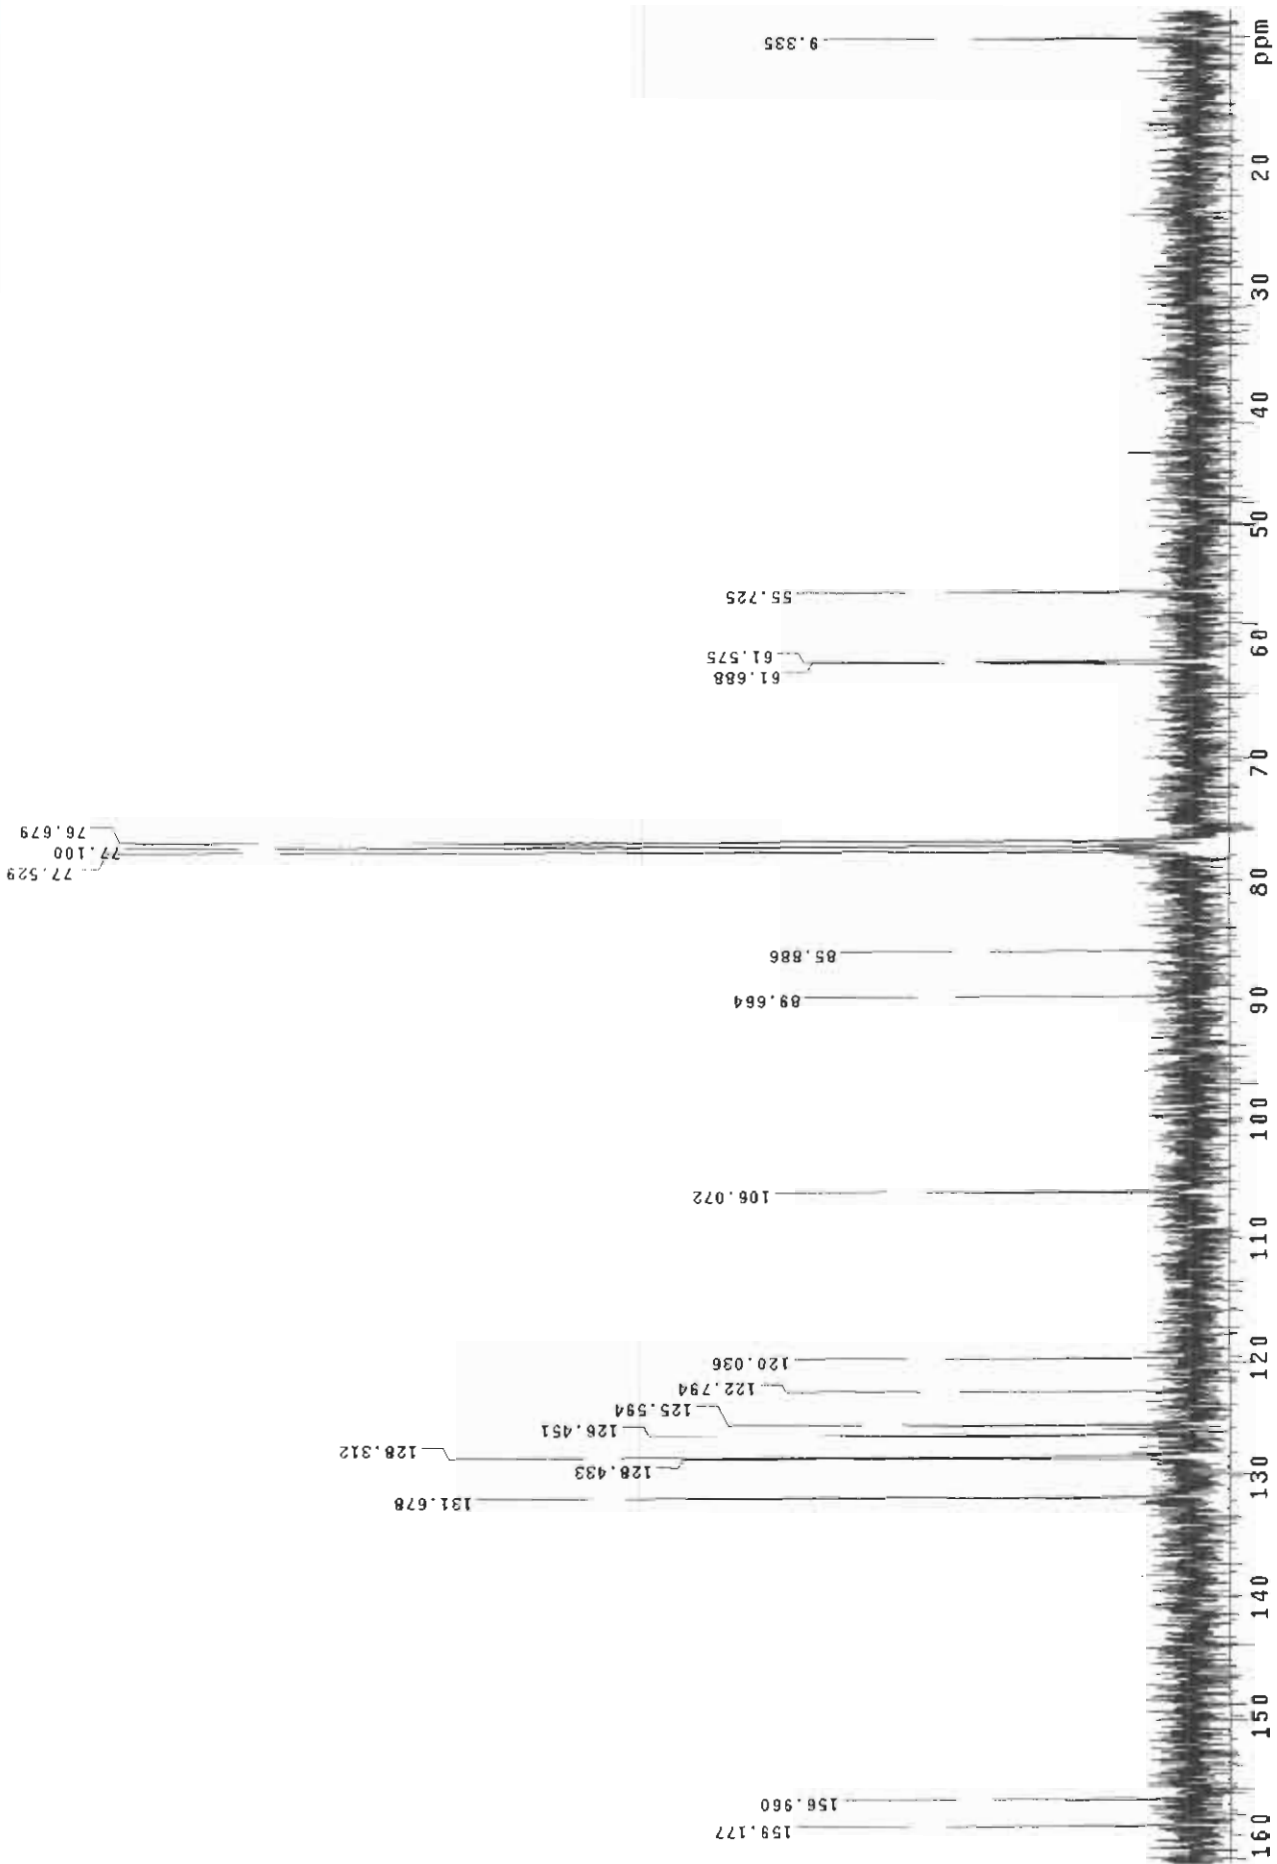

43-162-2

Pulse Sequence: szpu1

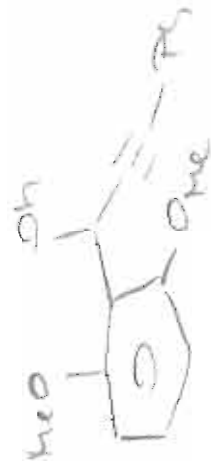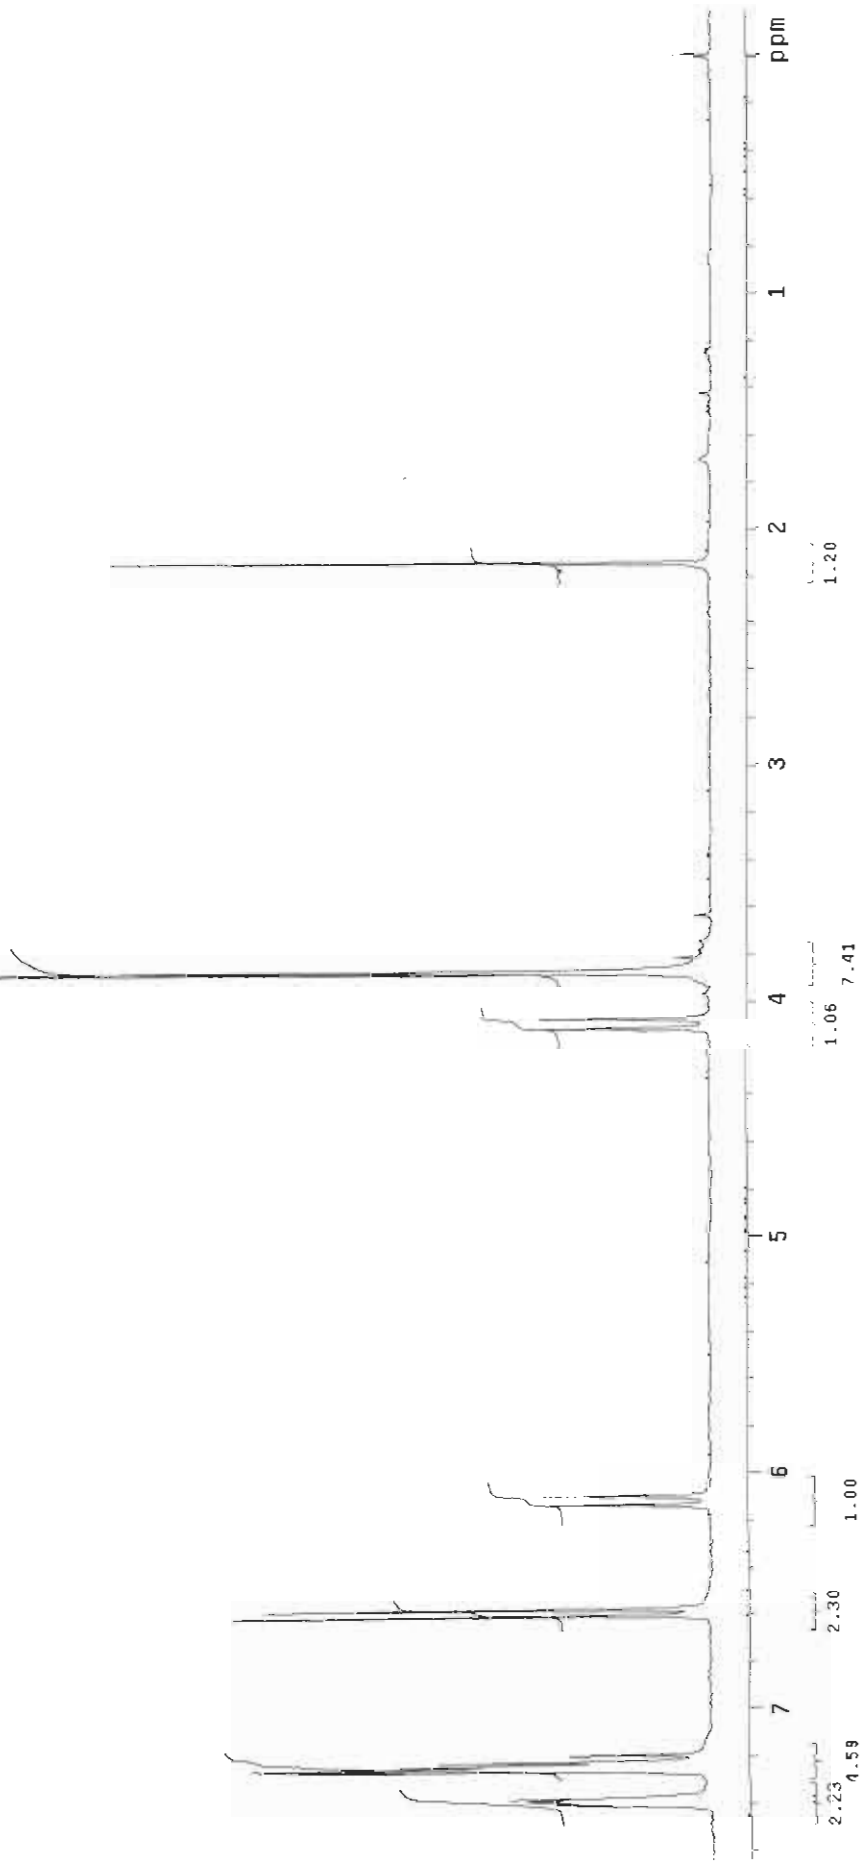



d3-162-2  
Pulse Sequence: s2pul

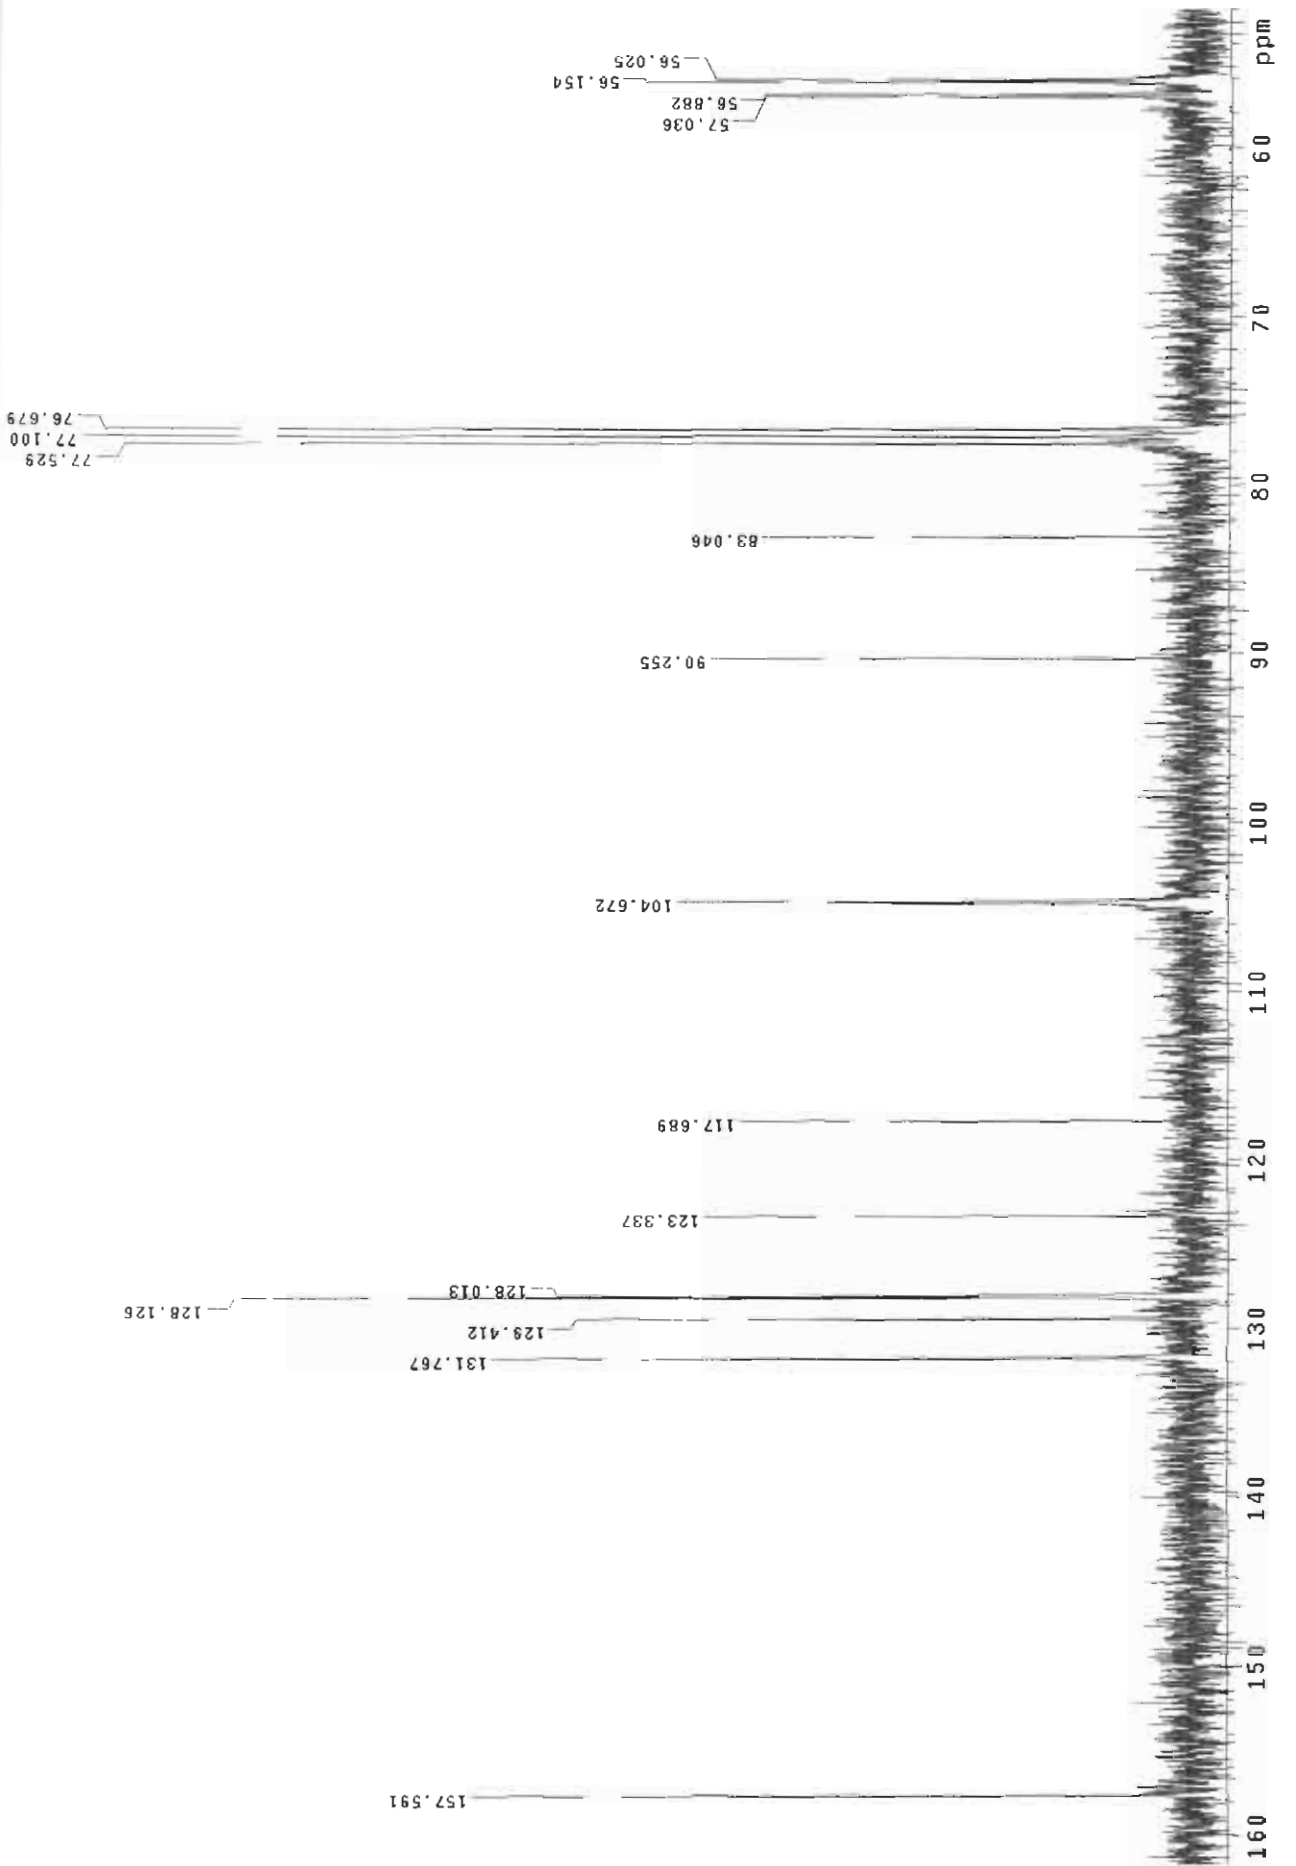

a3-181-

Pulse Sequence: s2pul  
Solvent: CDCl3  
Ambient Temperature  
GEMINI-300 "gem300"  
Relax. delay 1.000 sec  
Pulse 51.4 degrees  
Acq. time 2.000 sec  
Width 4000.0 Hz  
12 repetitions  
OBSERVE H1, 300.0354248 MHz  
DATA PROCESSING  
Line broadening 0.2 Hz  
FT size 32768  
Total time 0 min, 0 sec

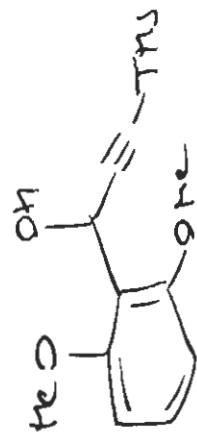

S 26

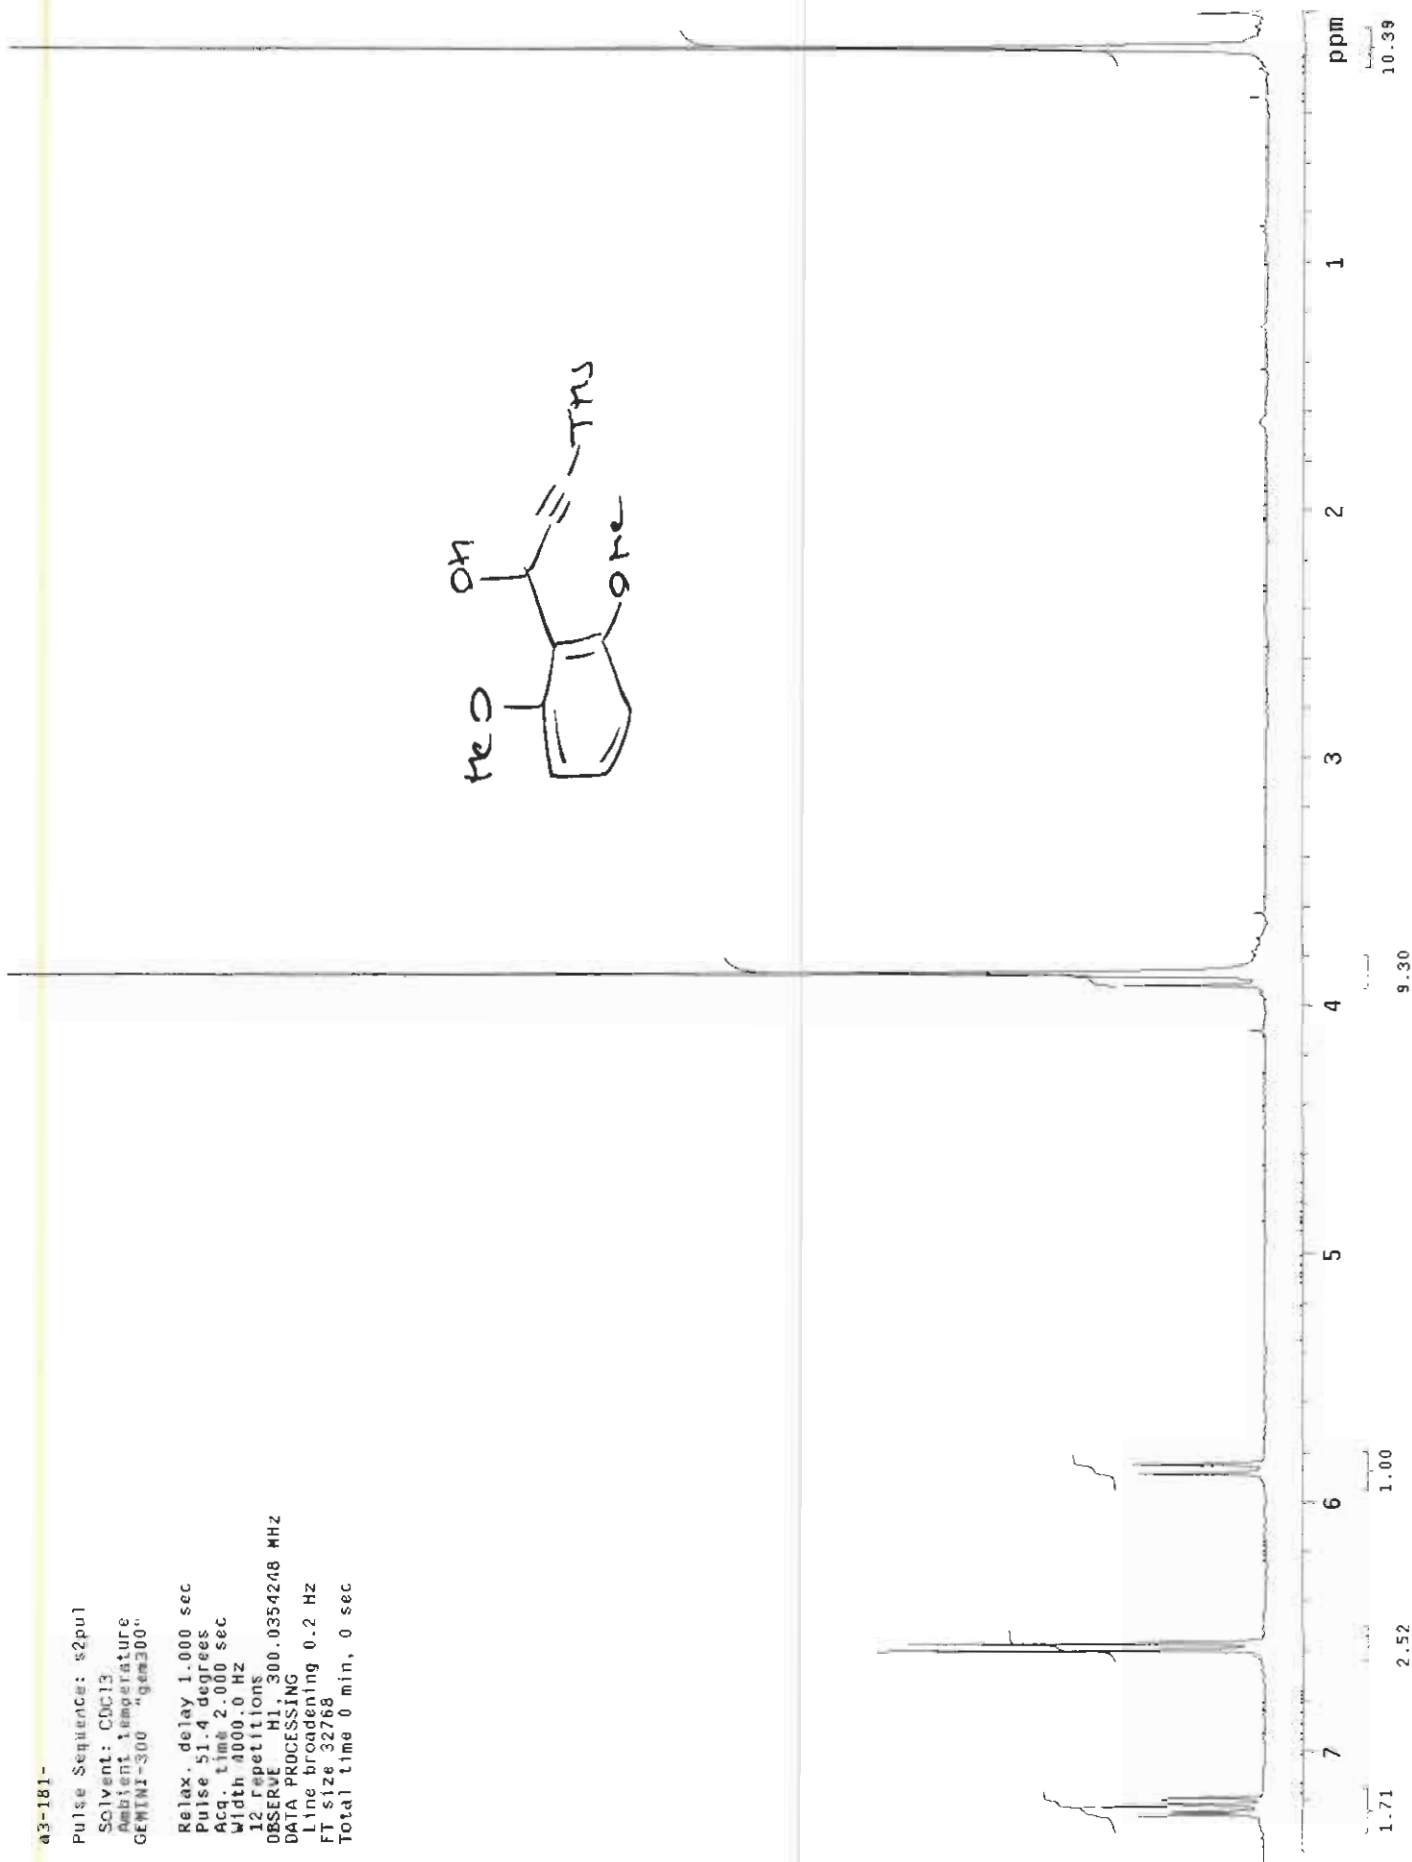

Pulse Sequence: s2pul  
Solvent: CDC13  
Ambient temperature  
GEMINI-300 "gem300"  
  
Relax. delay 2.000 sec  
Pulse 55.4 degrees  
Acq. time 1.600 sec  
Width 20000.0 Hz  
40 repetitions  
OBSERVE C13, 75.4438962 MHZ  
DECOUPLE H1, 300.0369250 MHZ  
Power 0 dB  
continuously on  
WALTZ-16 modulated  
DATA PROCESSING  
Line broadening 1.0 Hz  
FT size 65536  
Total time 19 min, 45 sec

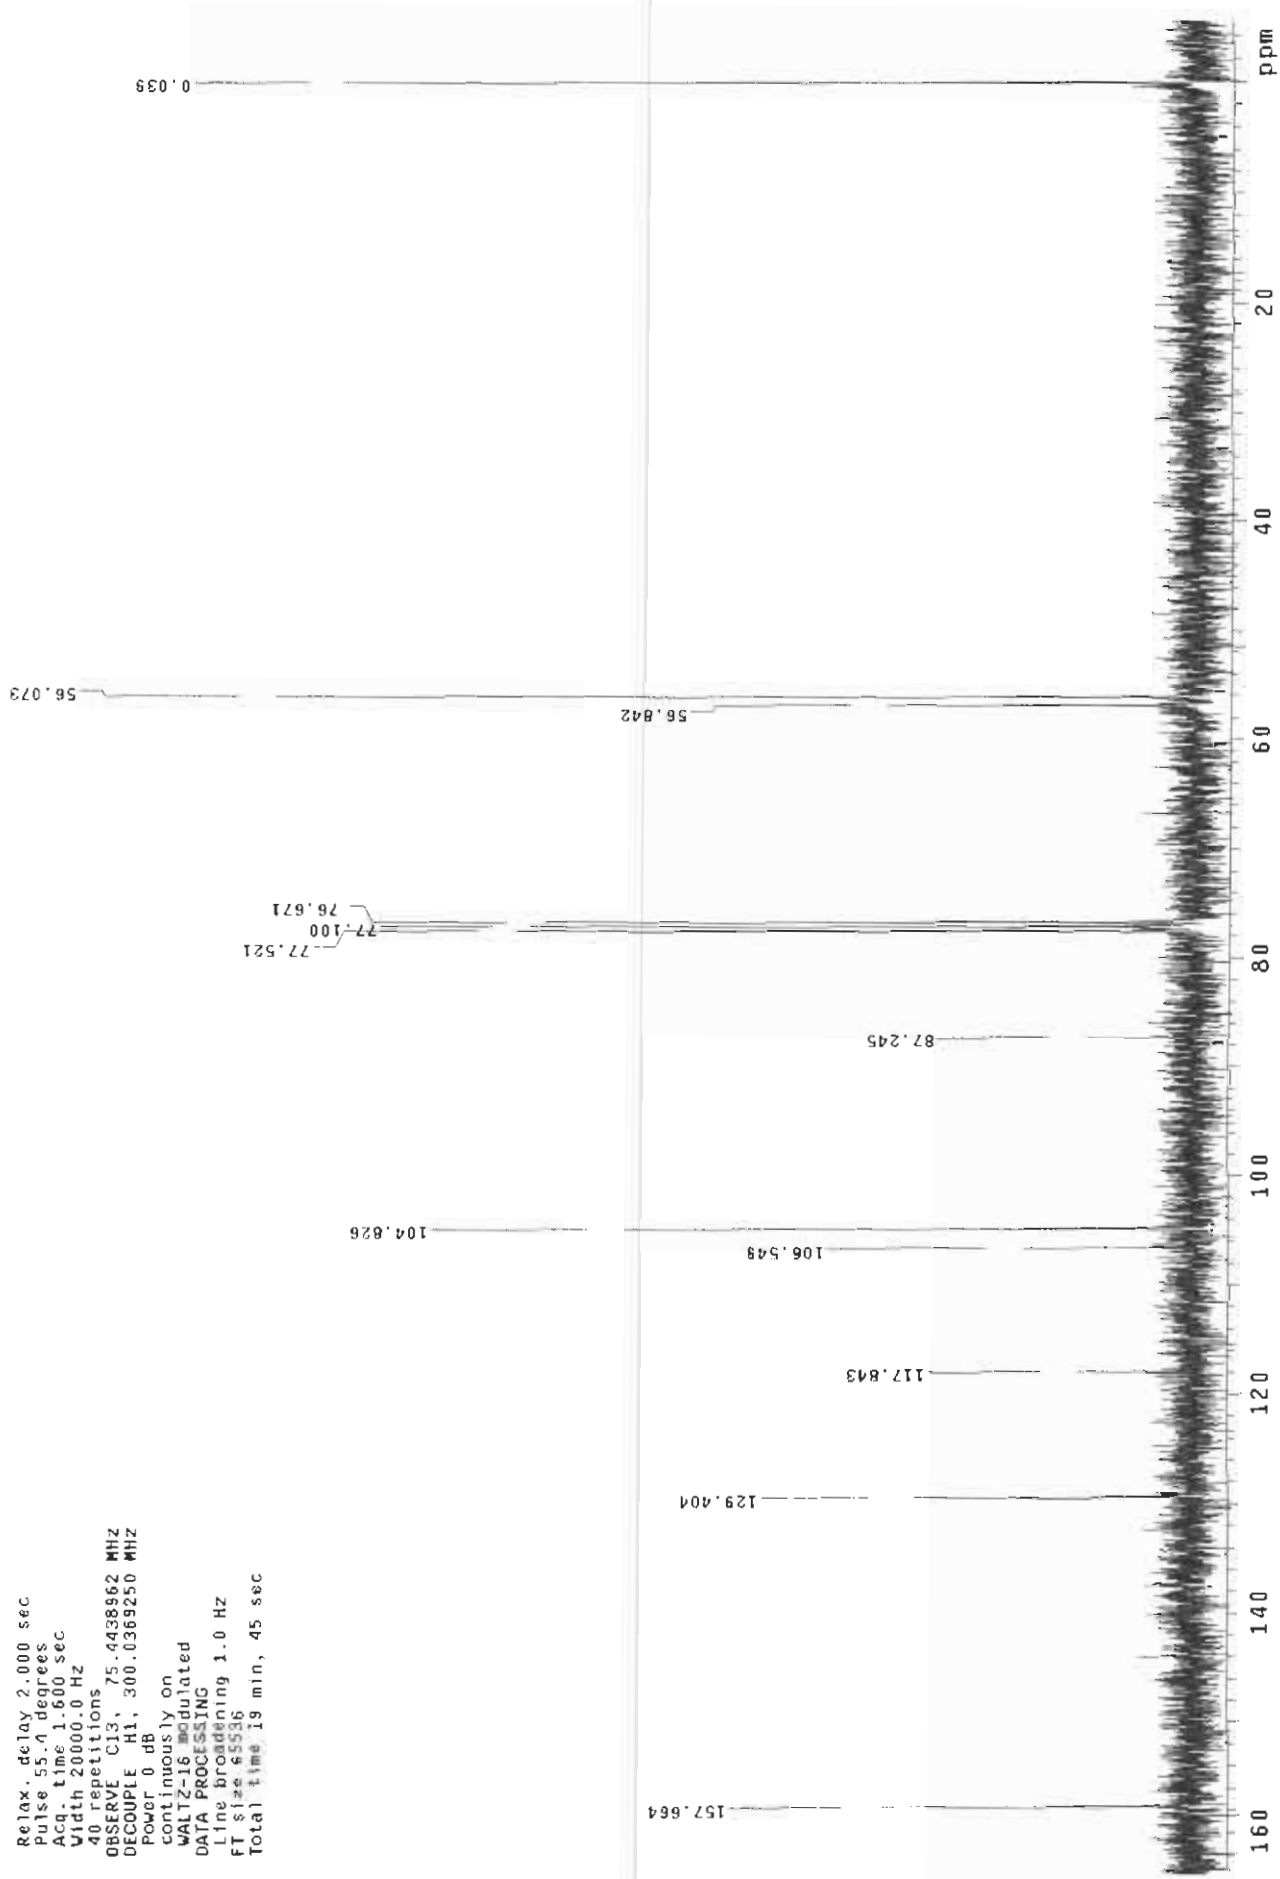

49-193-1

Pulse Sequence: #2pul1  
Solvent: CDCl3  
Ambient temperature  
of MNI-300 "5mm300"

Relax. delay 1.000 sec  
Pulse 51.4 degrees  
Acq. time 2.000 sec  
Width 4000.0 Hz  
20 repetitions  
OBSERVE H1, 300.0354231 MHz  
DATA PROCESSING  
Line broadening 0.2 Hz  
F1 size 32768  
Total time 1 min, 46 sec

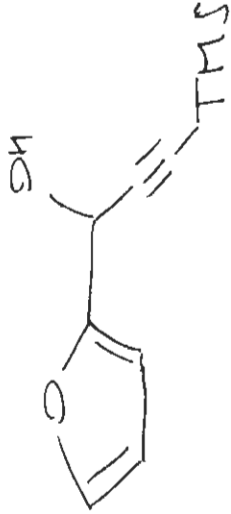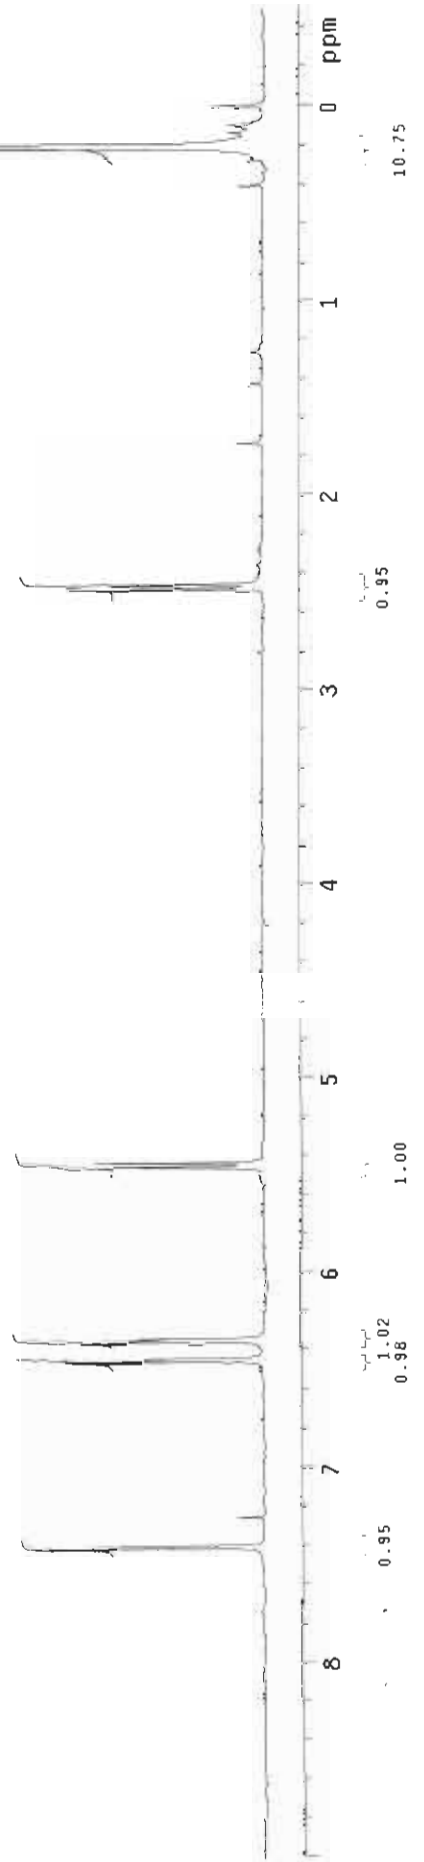

Pulse Sequence: s2pul  
 Solvent: dCl2  
 Ambient Temperature  
 GEMINI-500 "gem300"  
 Relax Delay 2.000 sec  
 Pulse 55.4 degrees  
 Acq. time 1.600 sec  
 Width 20000.0 Hz  
 20 repetitions  
 OBSERVE C13, 75.4438969 MHz  
 DECOUPLE H1, 300.0369250 MHz  
 Power 0 dB  
 continuously on  
 WALTZ-16 modulated  
 DATA PROCESSING  
 Line broadening 1.0 Hz  
 FT size 65536  
 Total time 19 min, 45 sec

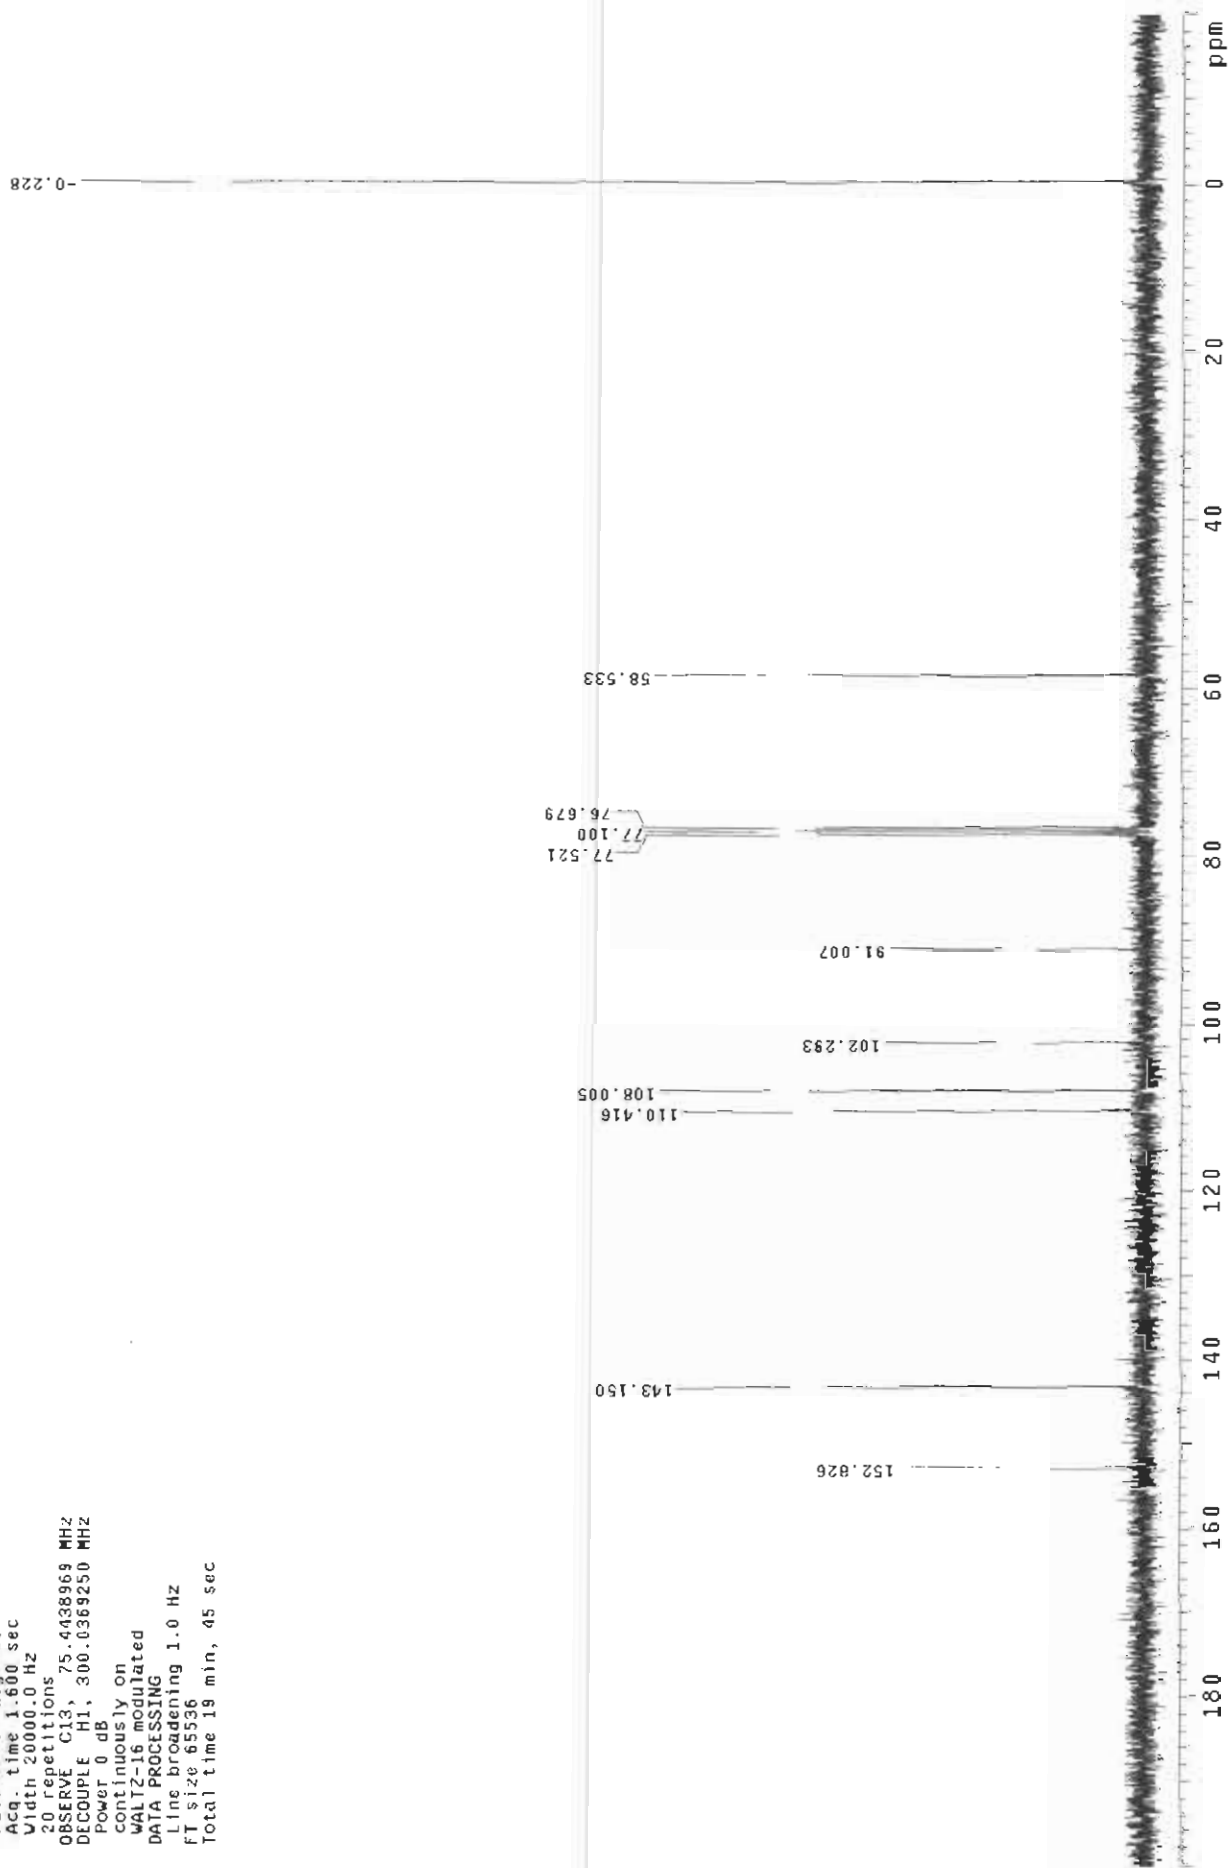

43-188-1

Pulse Sequence: S2pul  
Solvent: CDC13  
Ambient temperature  
GEMINI-300 "gem300"

Relax. delay 1.000 sec  
Pulse 51.4 degrees  
Acq. time 2.000 sec  
Width 4000.0 Hz  
8 repetitions  
OBSERVE H1, 300.0354245 MHz  
DATA PROCESSING  
Line broadening 0.2 Hz  
FT size 32768  
Total time 0 min, 0 sec

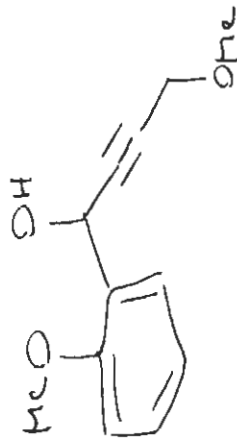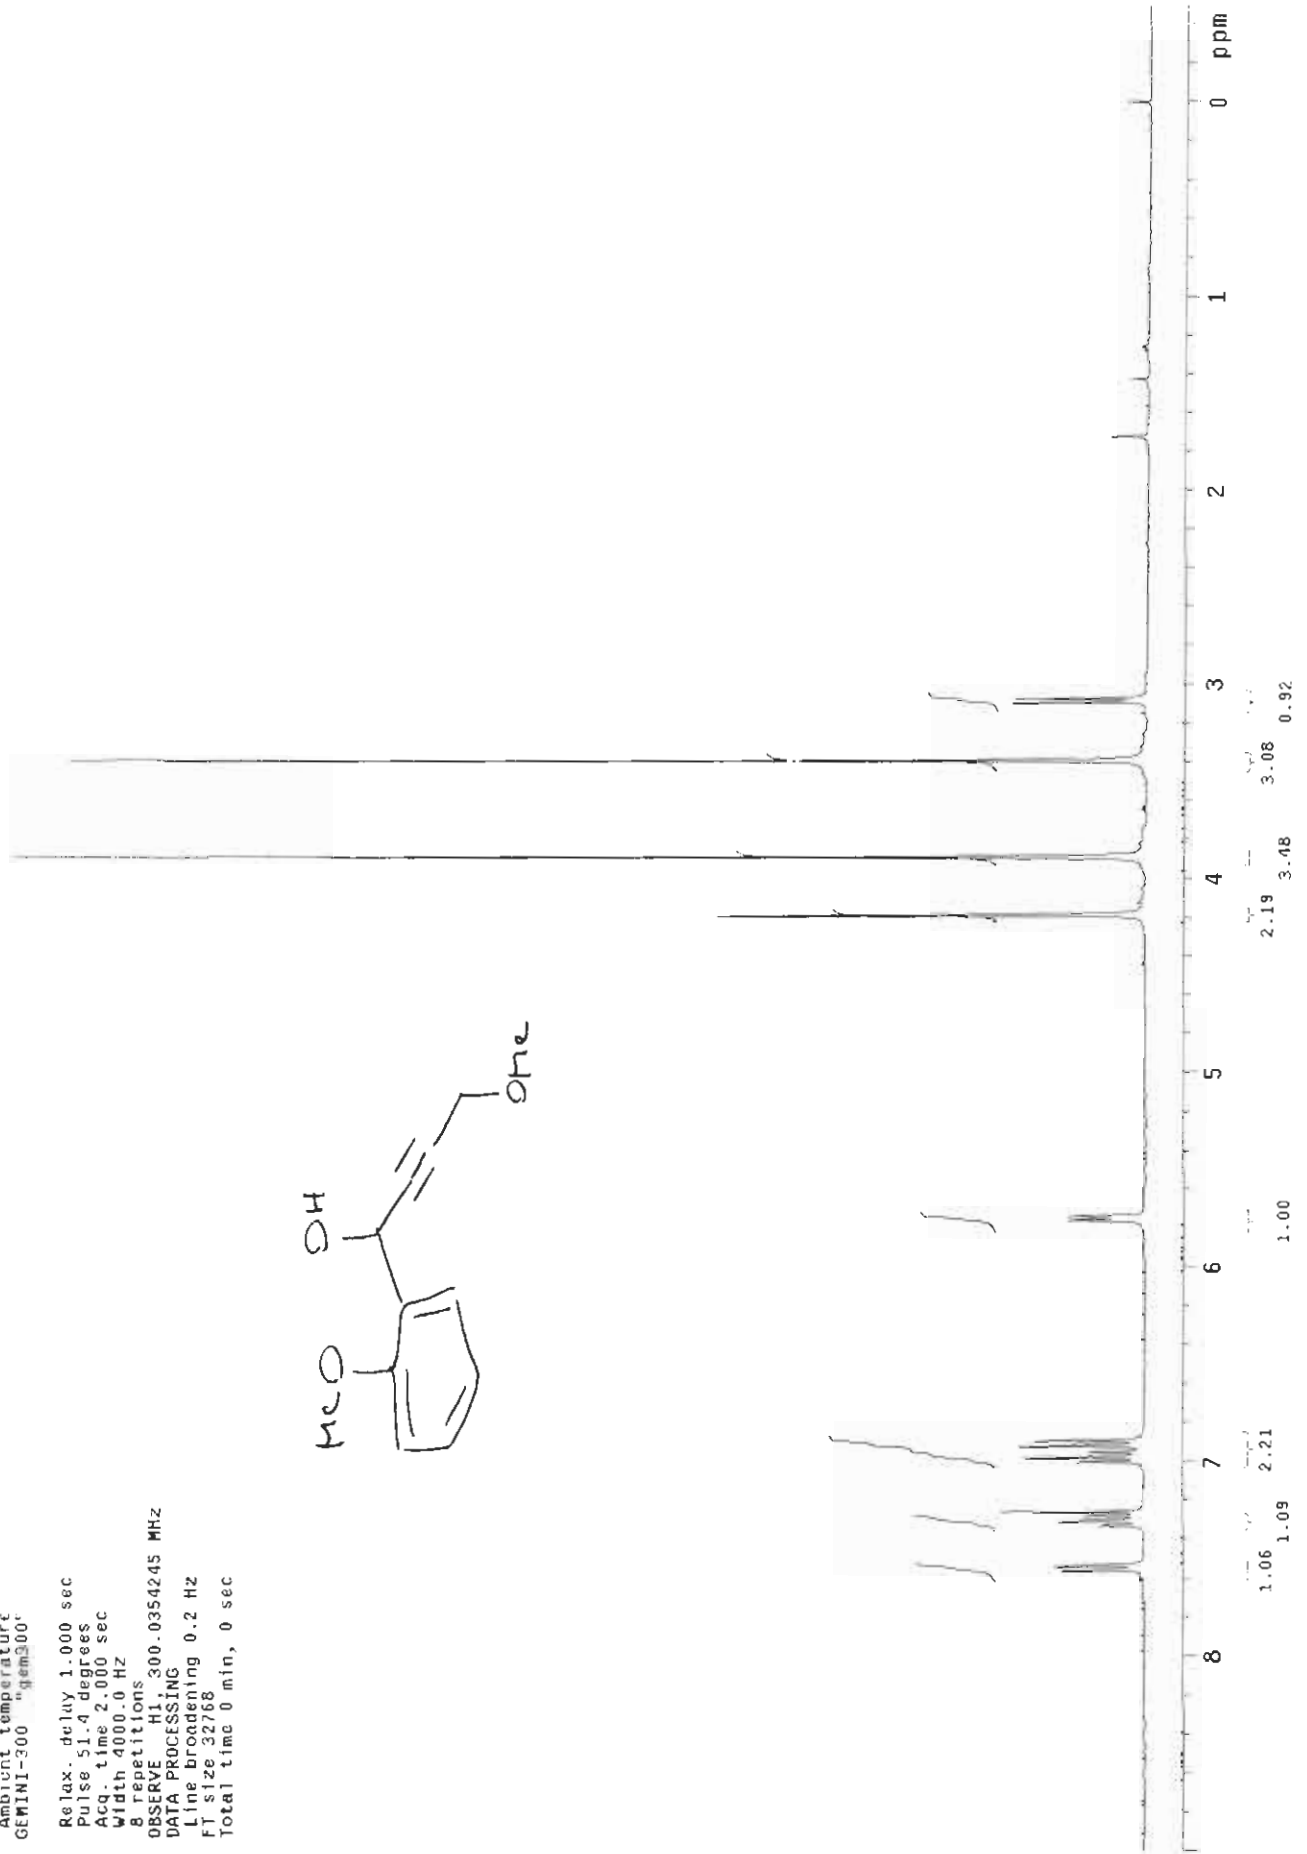

43-187-1  
Pulse Sequence: s2pul

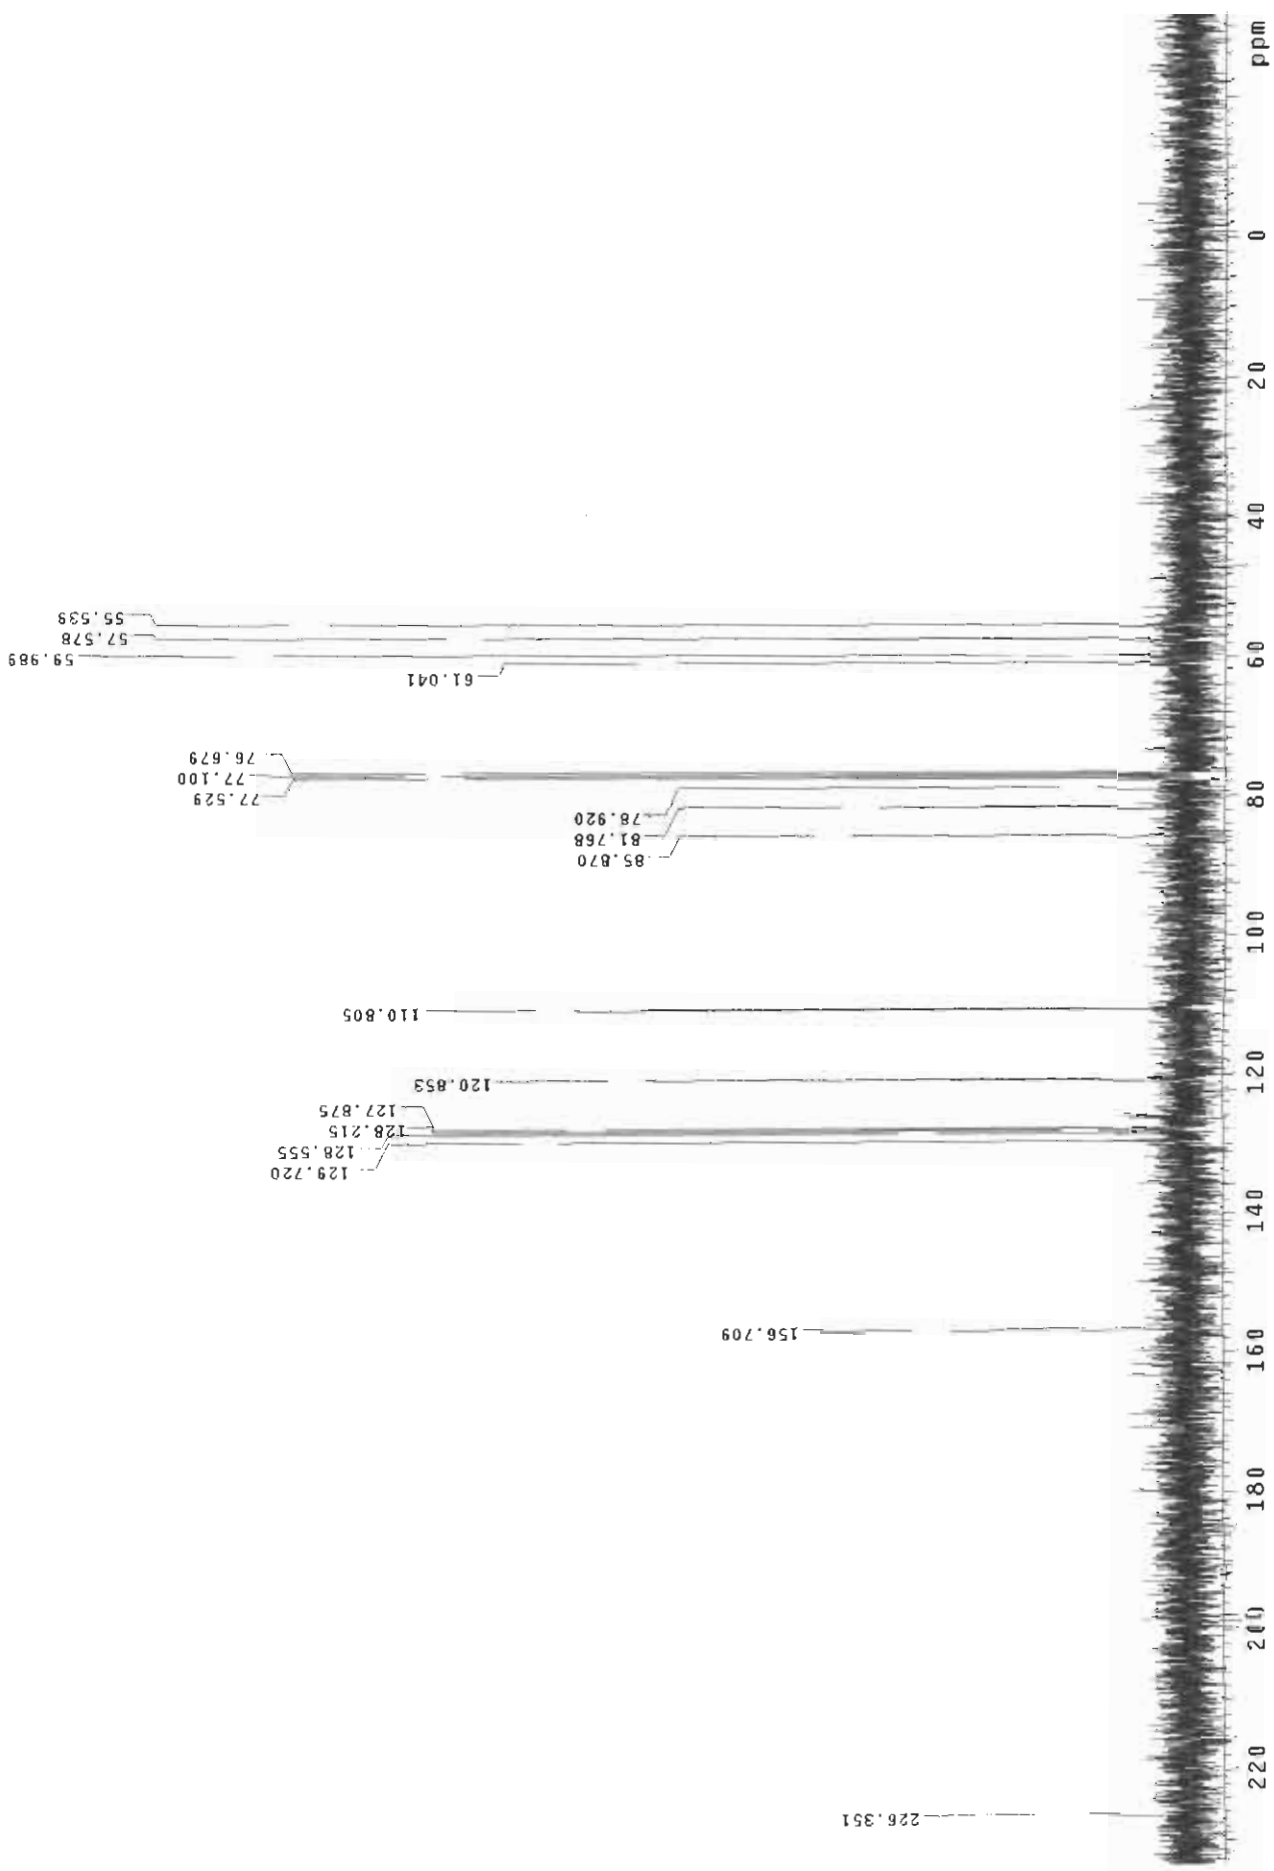

d3-184

Pulse Sequence: s2pu1

Solvent: CDCl3

Ambient Temperature

QEMINI-300 'qem300"

Relax. delay 1.000 sec

Pulse 51.4 degrees

Acq. time 2.000 sec

Width 4000.0 Hz

16 Repetitions

OBSERVE H1, 300.0354238 MHz

DATA PROCESSING

Line broadening 0.2 Hz

FI size 32768

Total time 0 min, 0 sec

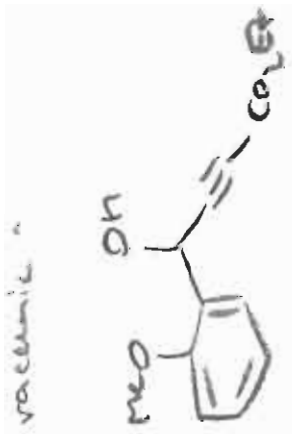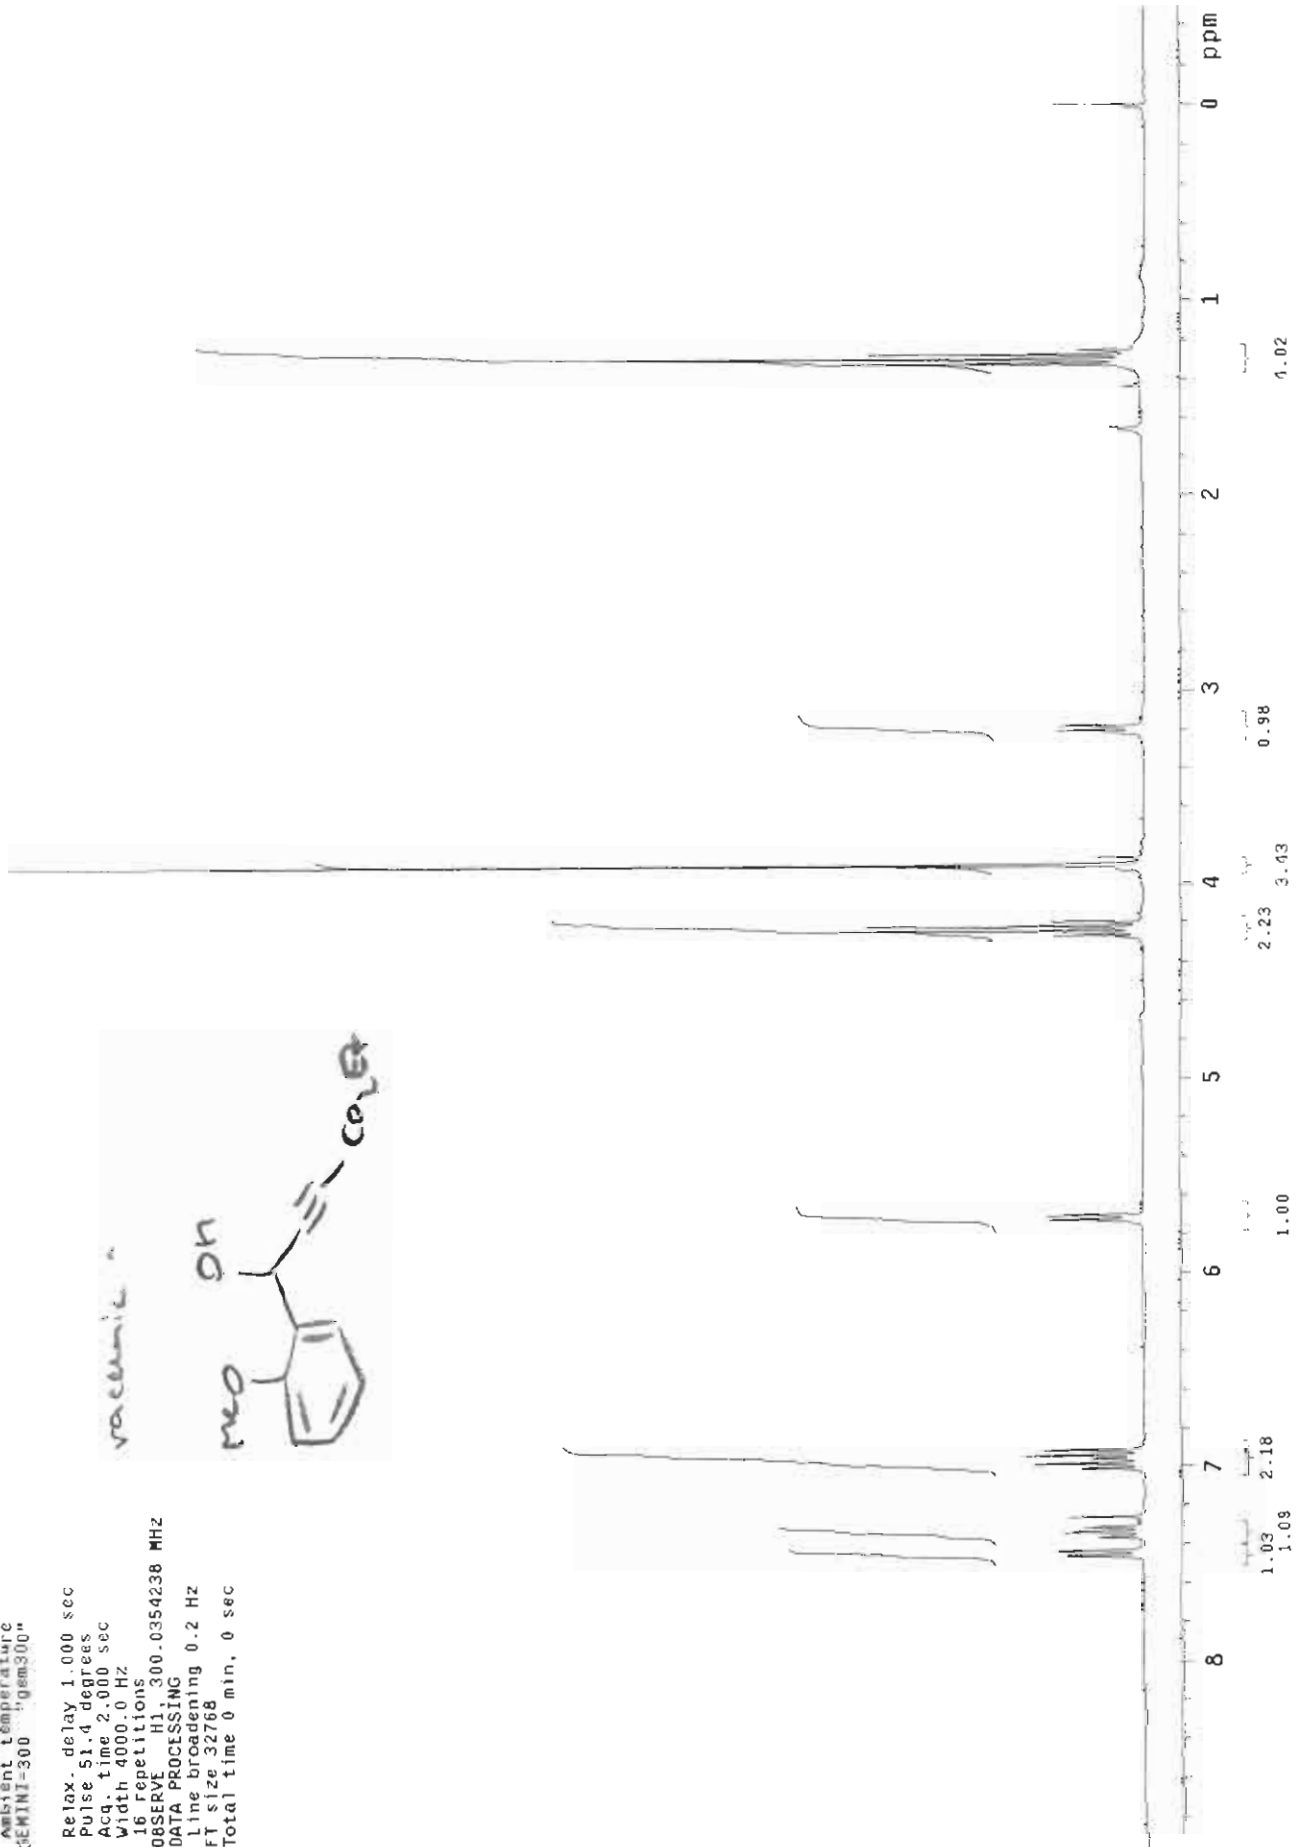



u3-194

Pulse Sequence: s2pul  
Solvent: CDCl3  
Ambient temperature  
GEMINI-300 "gdm300"

Relax. delay 2.000 sec  
Pulse 55.4 degrees  
Acq time 1.600 sec  
Width 20000.0 Hz  
64 repetitions  
OBSERVE C13, 75.4436956 MHz  
DECOUPLE H1, 300.0369250 MHz  
Power 0 dB  
continuously on  
WALTZ-16 modulated  
DATA PROCESSING  
Line broadening 1.0 Hz  
FT size 65536  
Total time 19 min, 45 sec

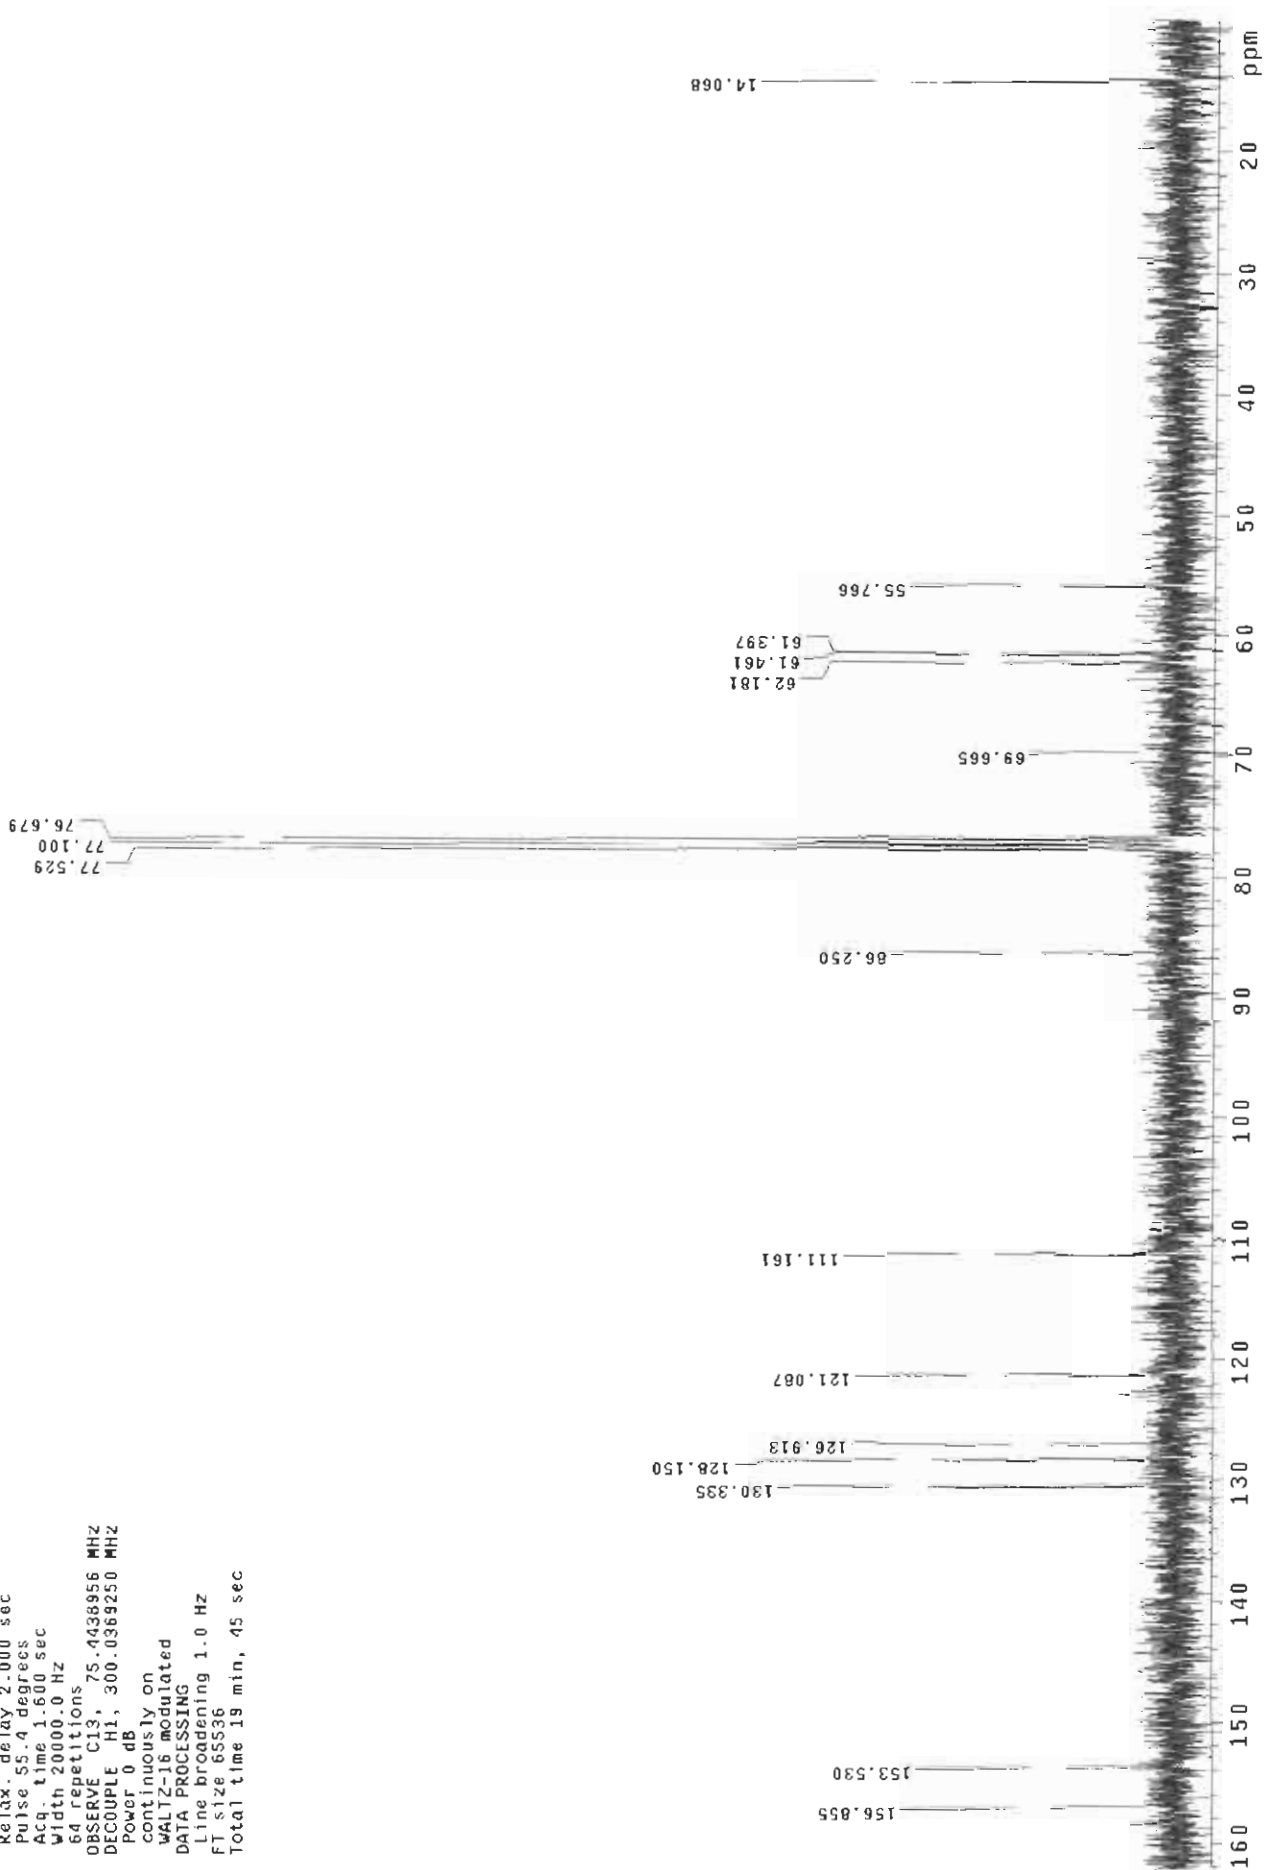

$^1\text{H}$  NMR, 400 MHz,  $\text{CDCl}_3$

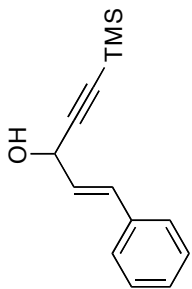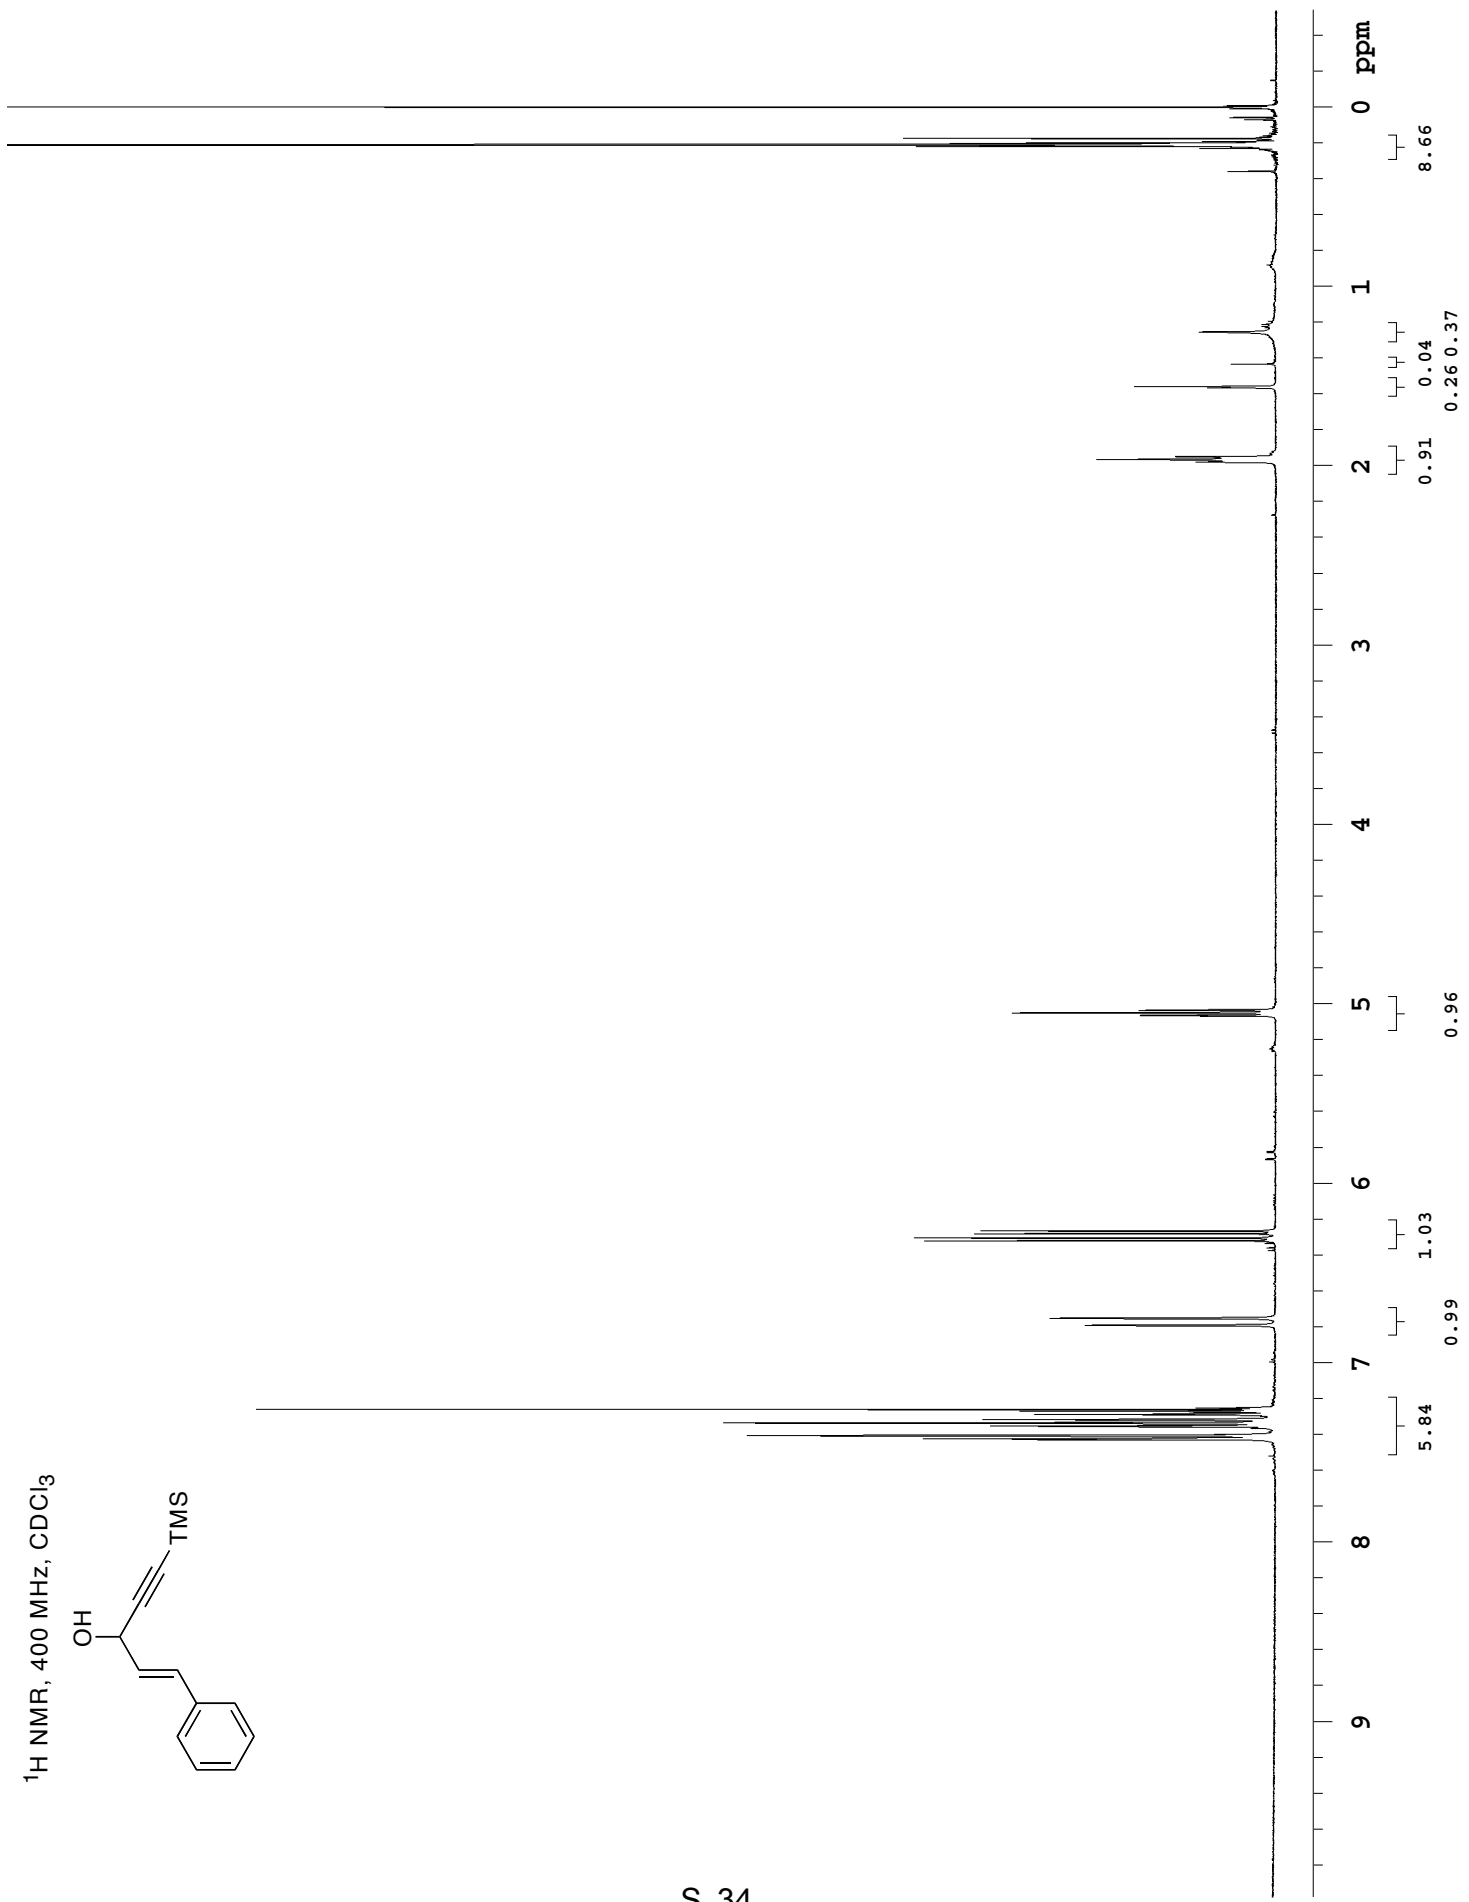

<sup>13</sup>C NMR, 101 MHz, CDCl<sub>3</sub>

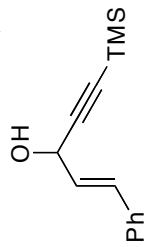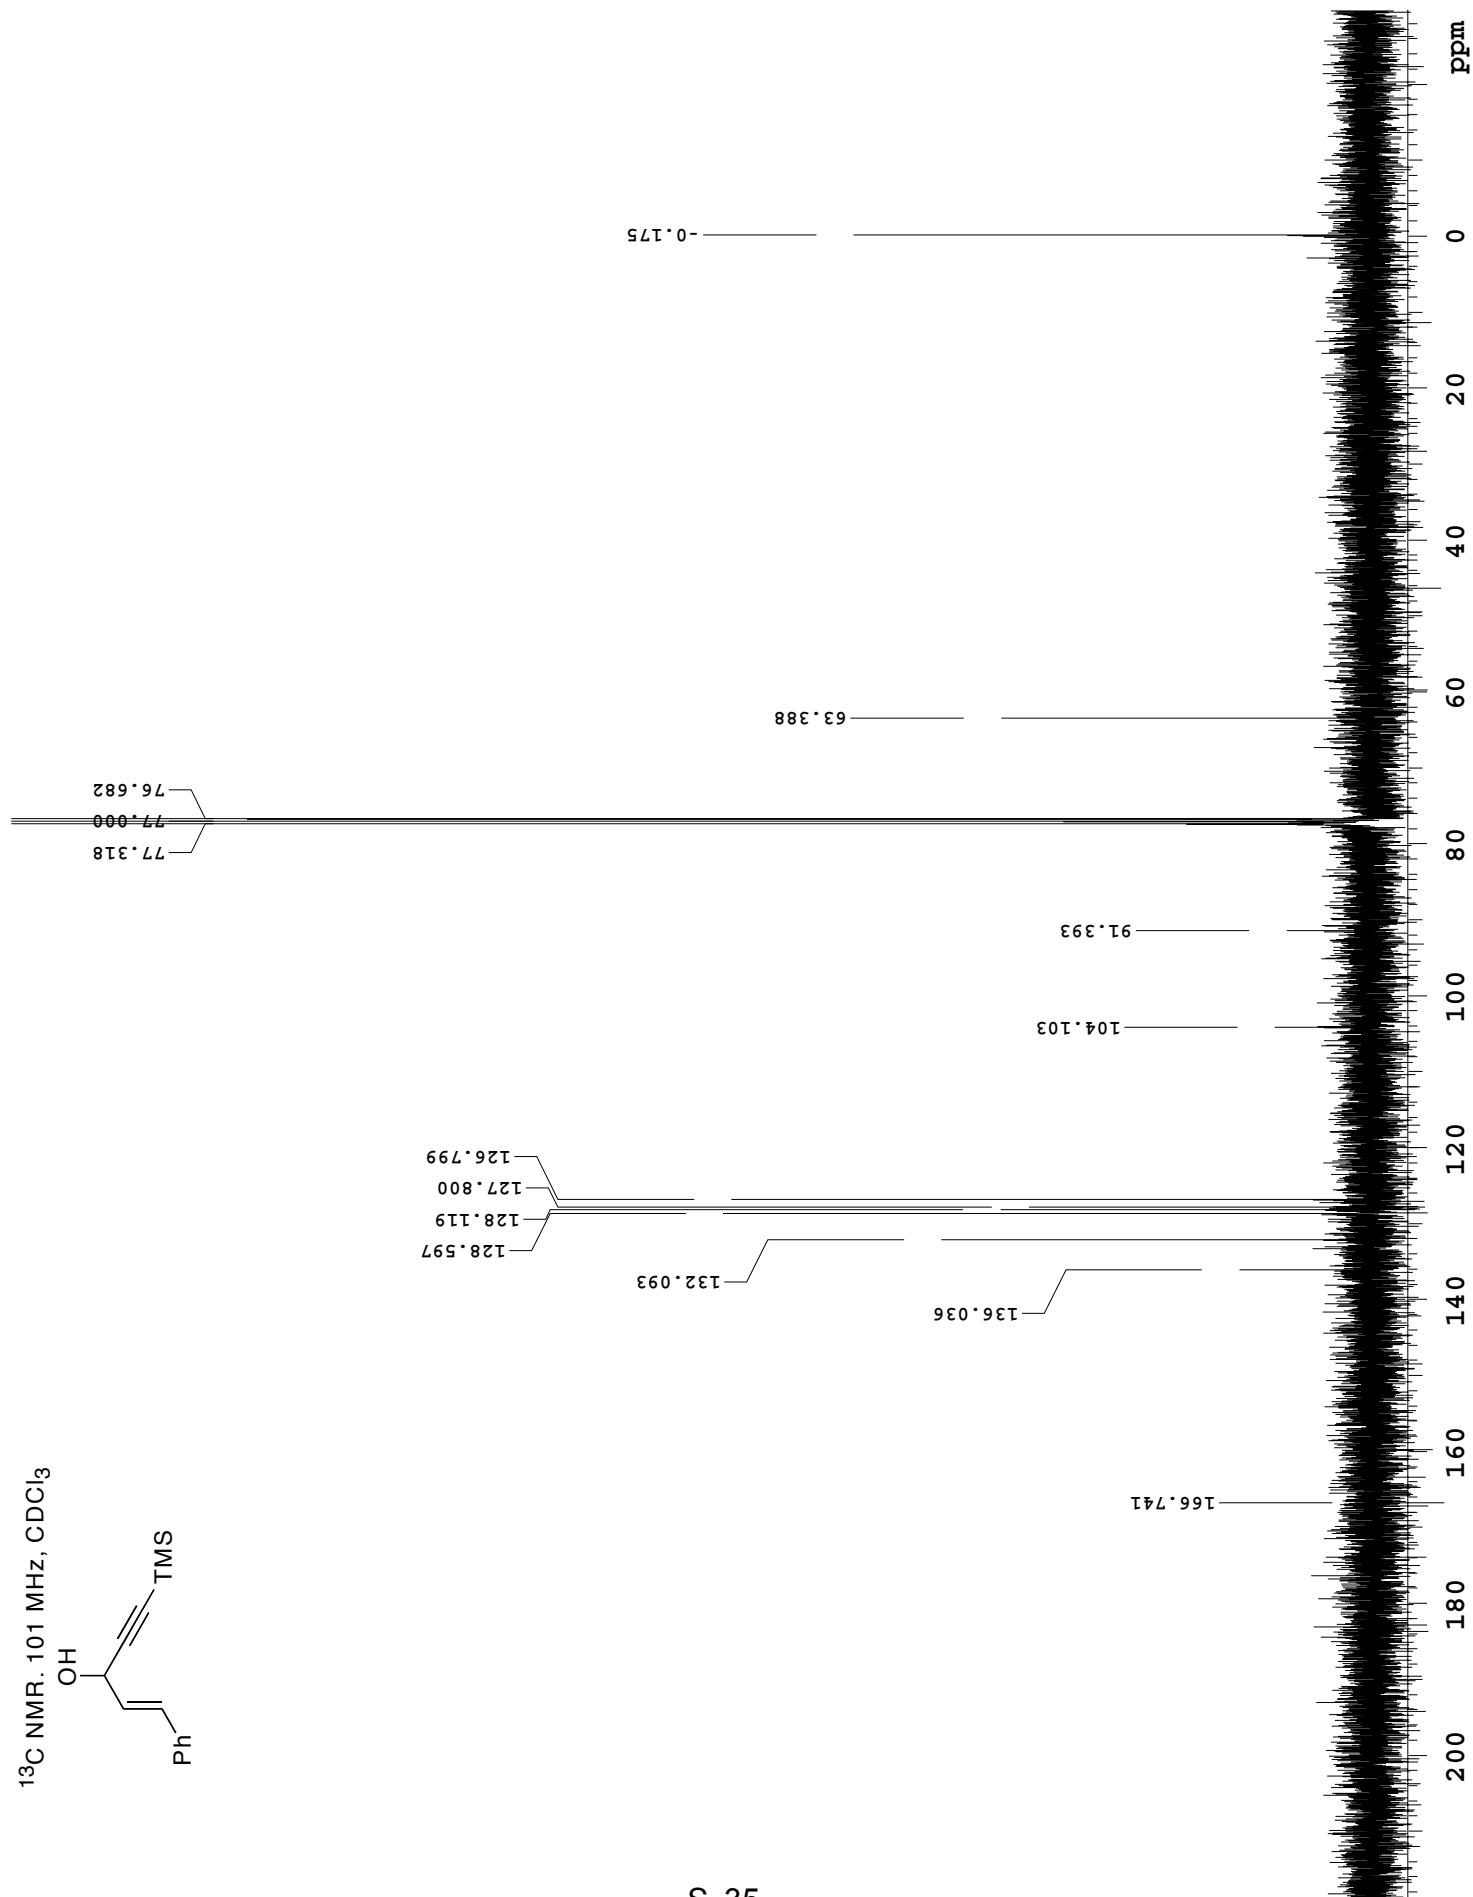

$^1\text{H}$  NMR, 400 MHz,  $\text{CDCl}_3$

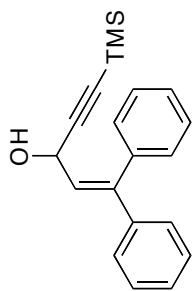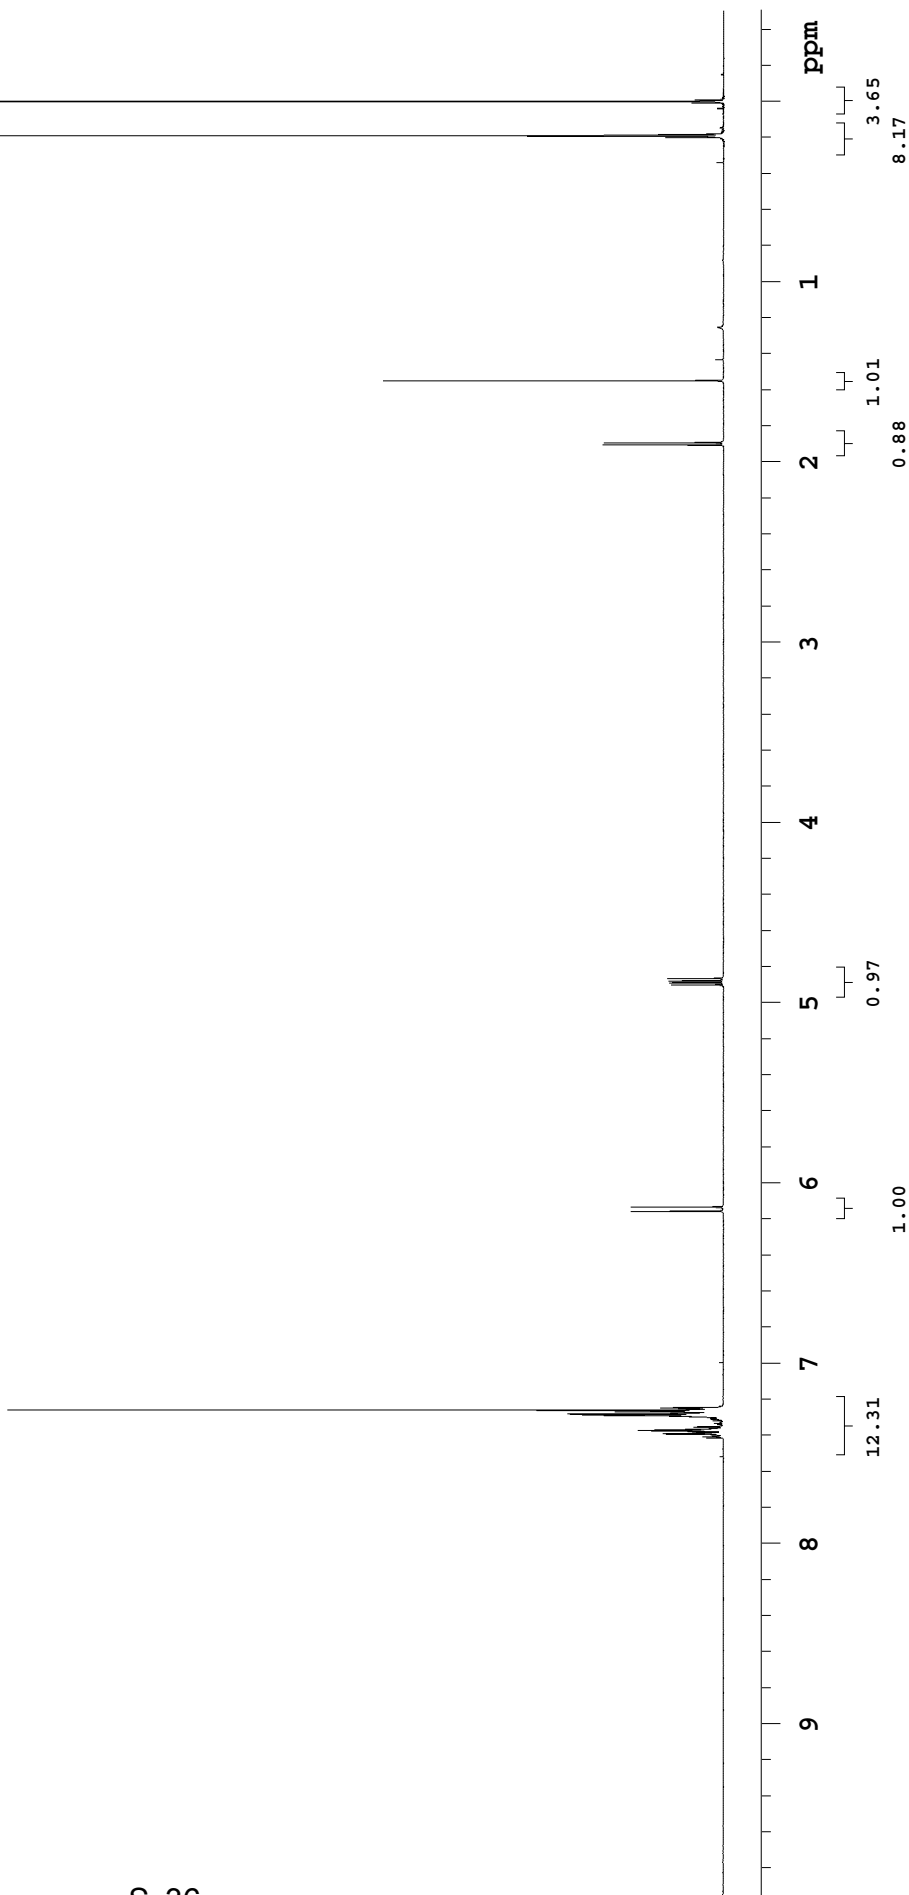

<sup>13</sup>C NMR, 101 MHz, CDCl<sub>3</sub>

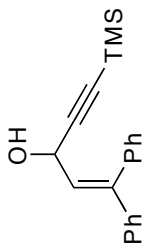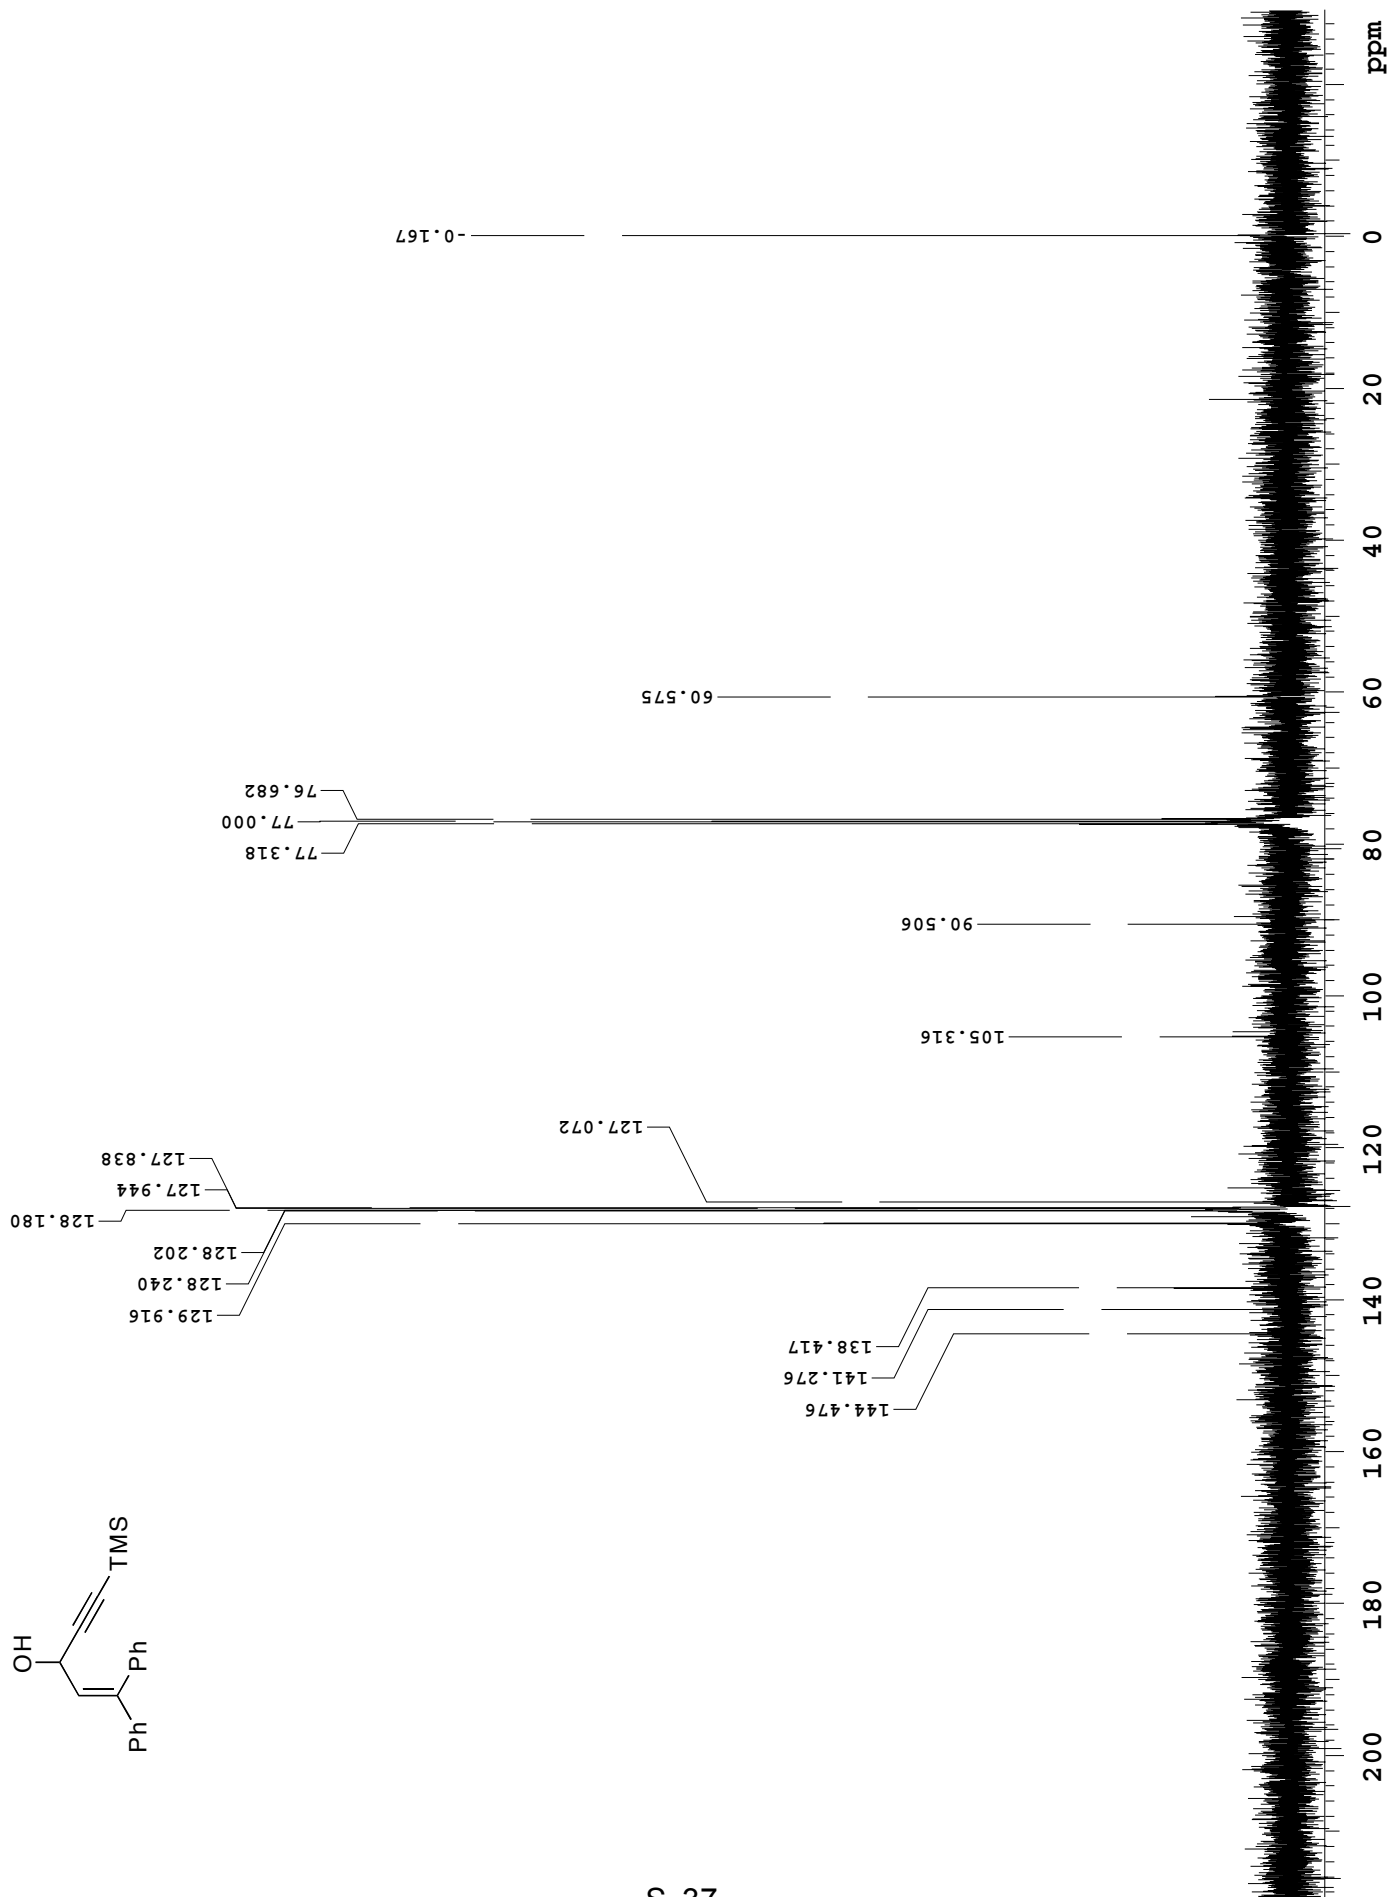

43-201-j

Pulse Sequence: sfpul

Solvent: CDCl3

Ambient temperature

NOVA-500 -ui500+

Relax. delay: 1.000 sec

Pulse: 90.0 degrees

Acq. time: 4.000 sec

Width: 8000.0 Hz

28 repetitions

OBSERVE: H1, 499.7485672 MHz

DATA PROCESSING

FT size 131072

Total time 5 min, 20 sec

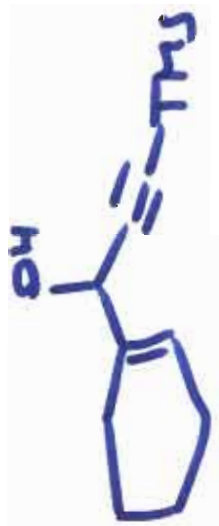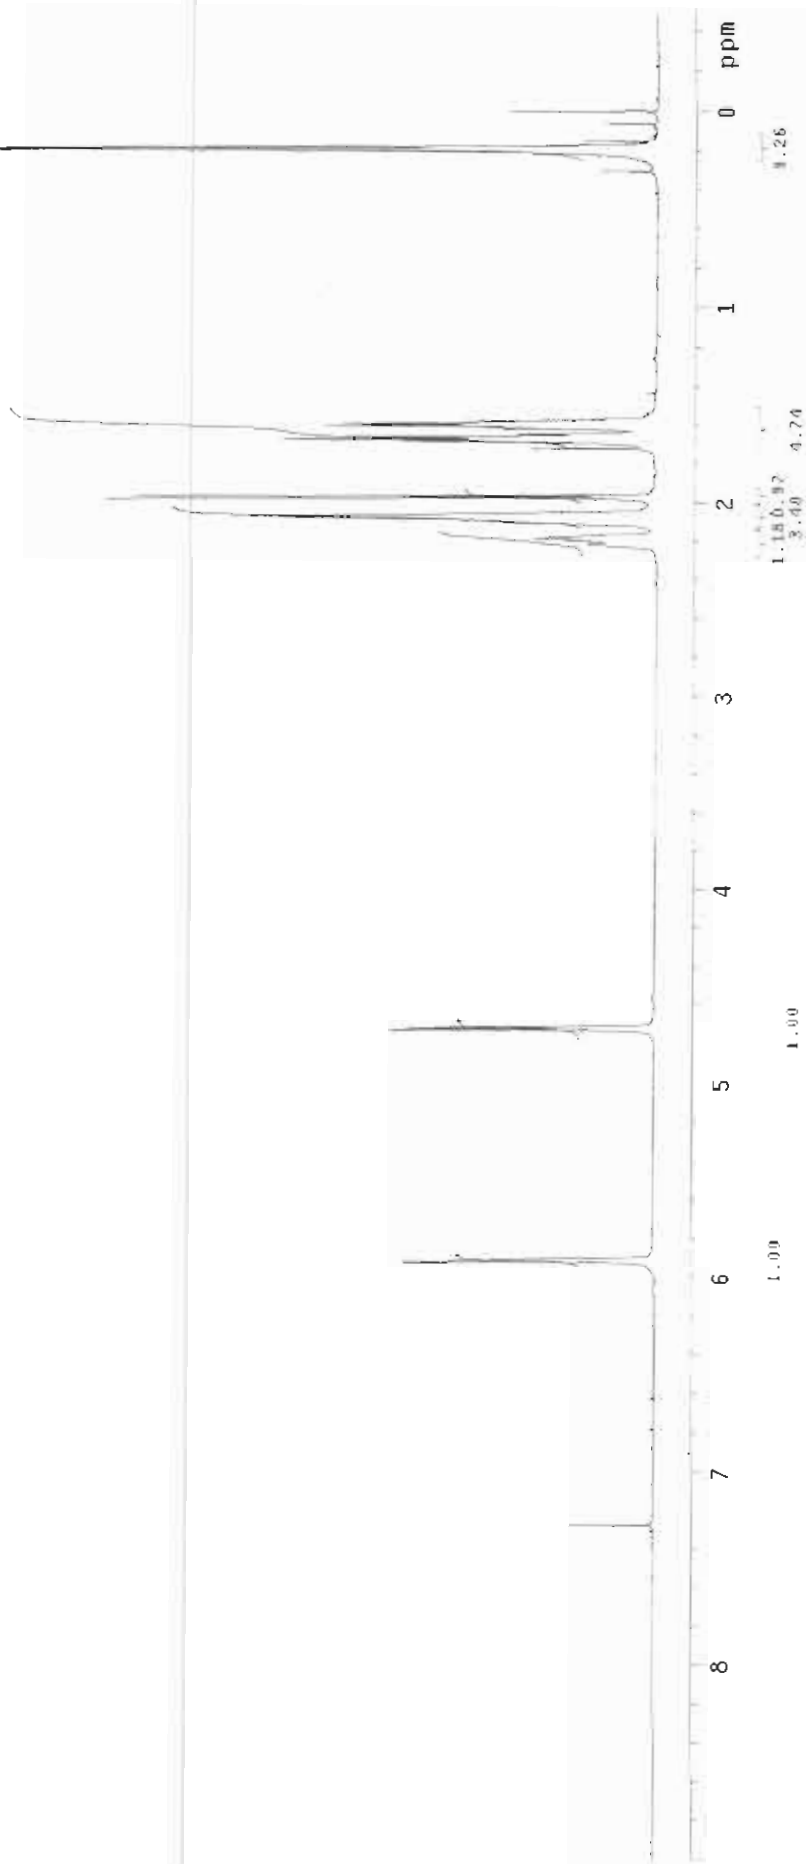

03-201-3

Puise Sequencé: #2put  
Solvant: C0C13  
Ambient température  
User: 1-15-87  
JMGVA-500 "01500"

Relax. delay 2.000 sec  
Pulse 33.3 degrees  
Acq. time 1.500 sec  
Width 33005.3 Hz  
20 repetitions  
OBSERVE C13 125.6518703 MHz  
DECOUPLE H1 499.7505605 MHz  
Power 42 dB  
continuously on  
WALTZ-16 modulated  
DATA PROCESSING  
Line broadening 2.0 Hz  
FT size 131072  
Total time 14 min, 58 sec

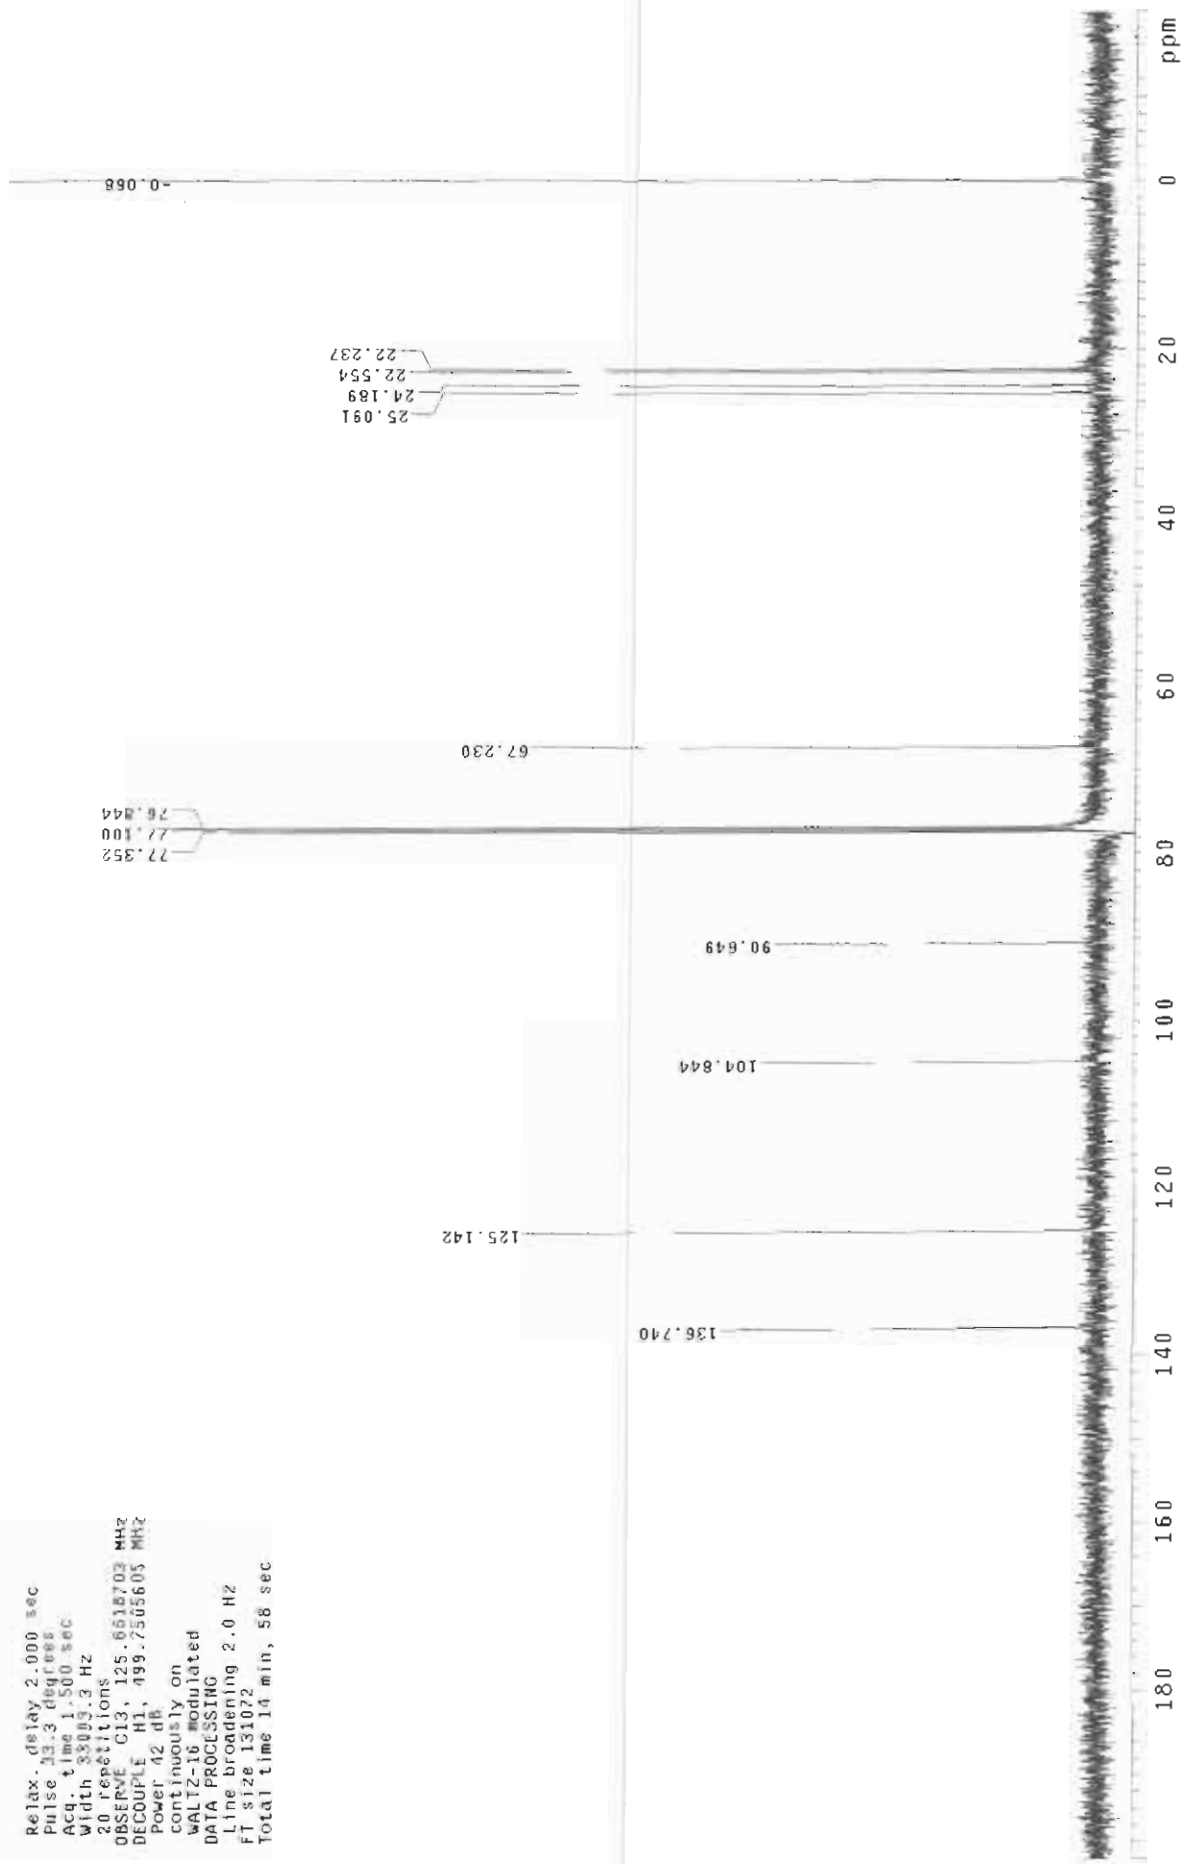

$^1\text{H}$  NMR. 400 MHz,  $\text{CDCl}_3$

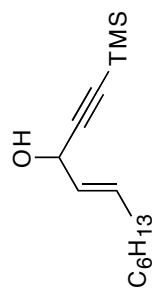

S 40

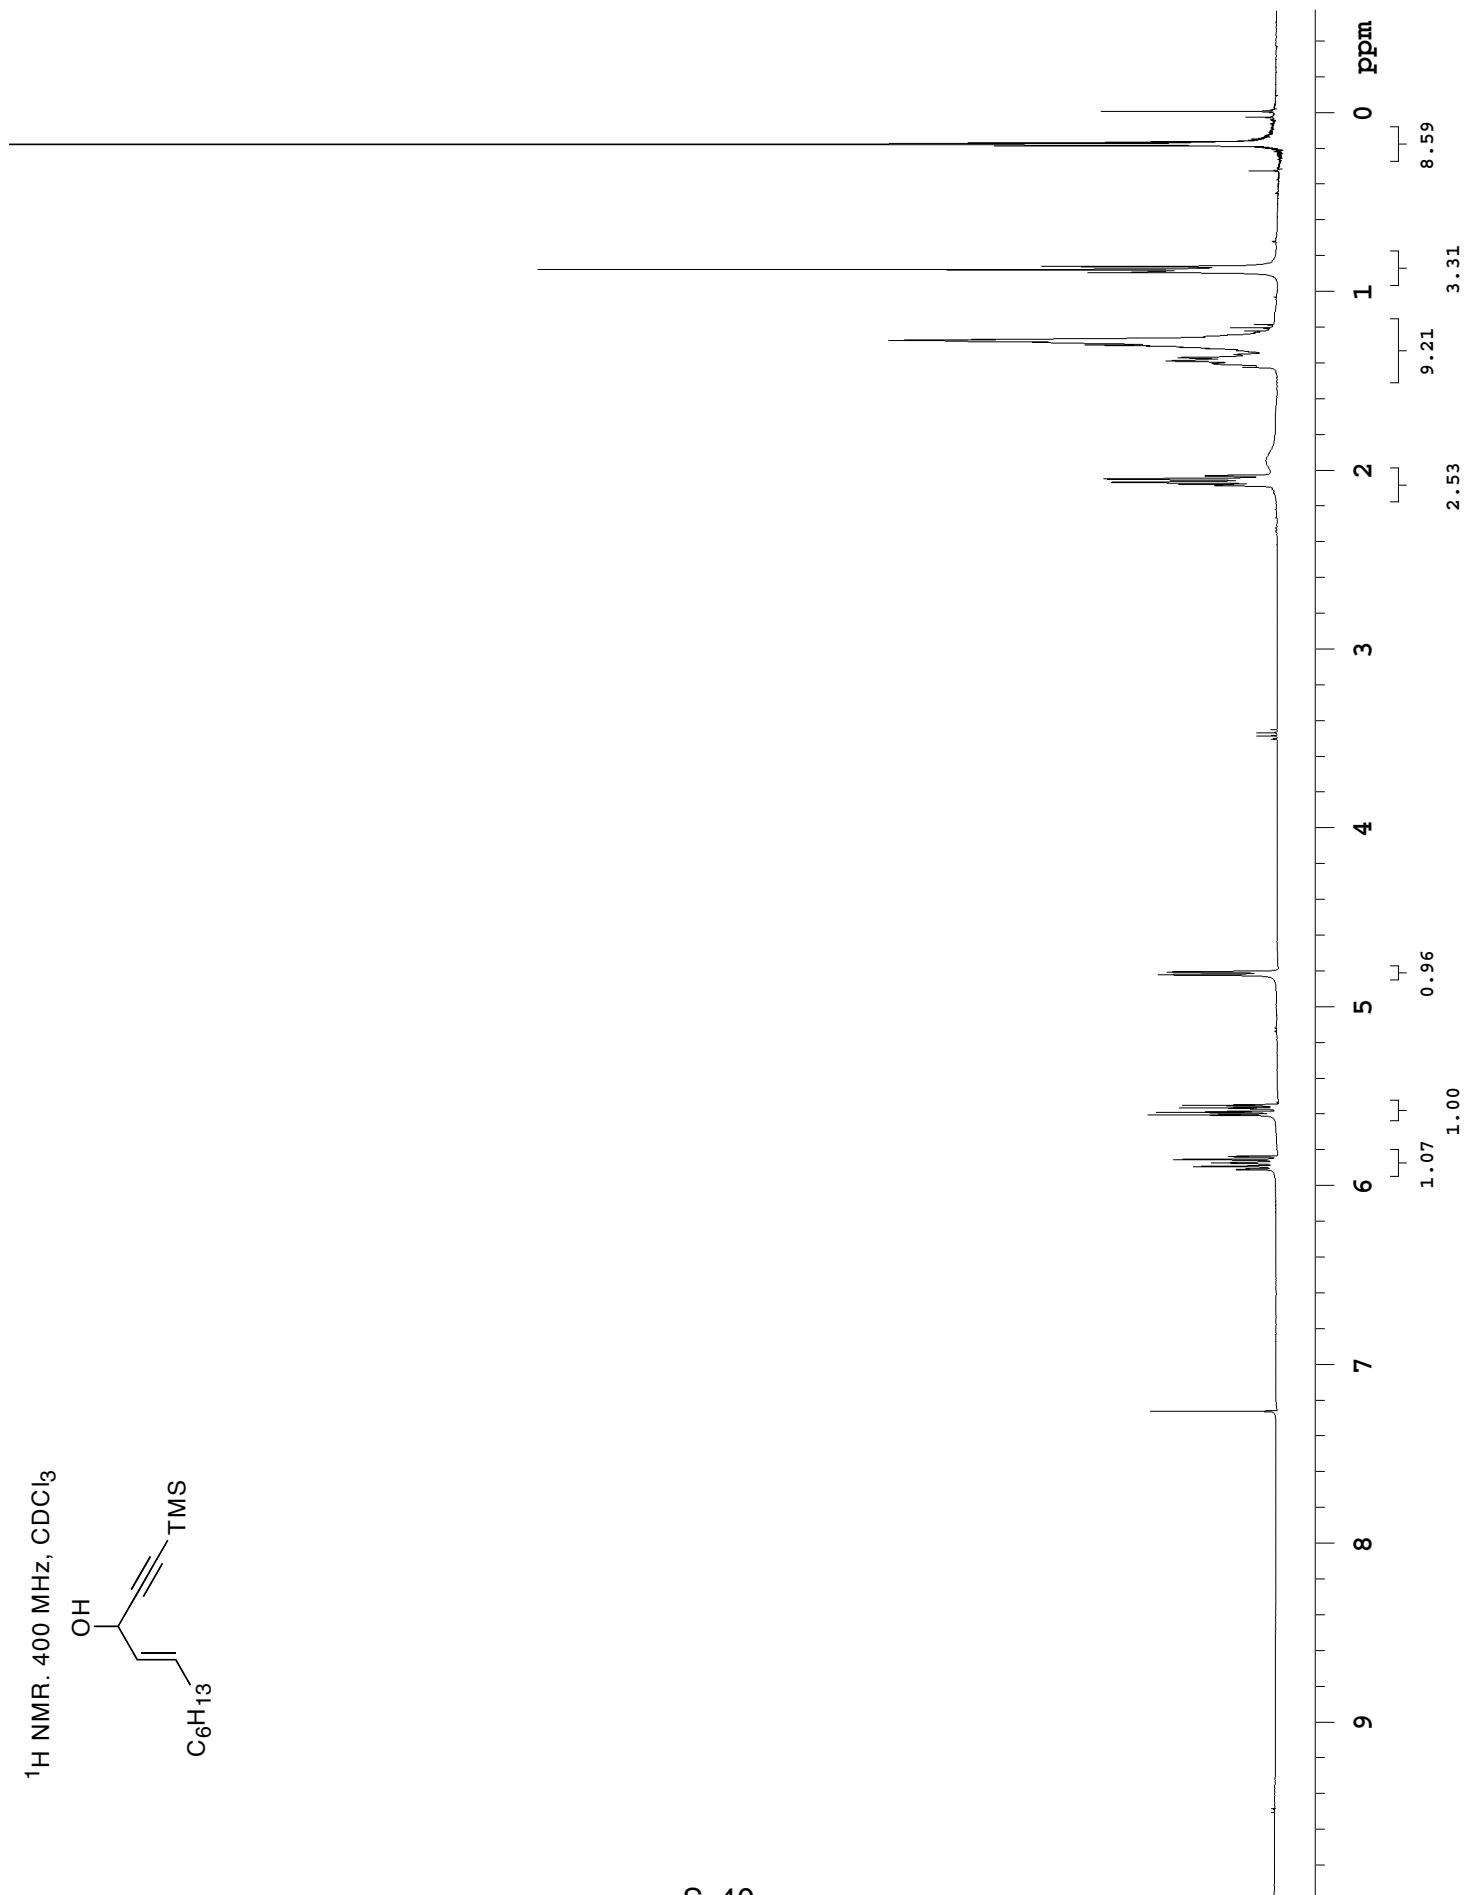



<sup>13</sup>C NMR, 101 MHz, CDCl<sub>3</sub>

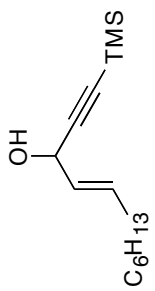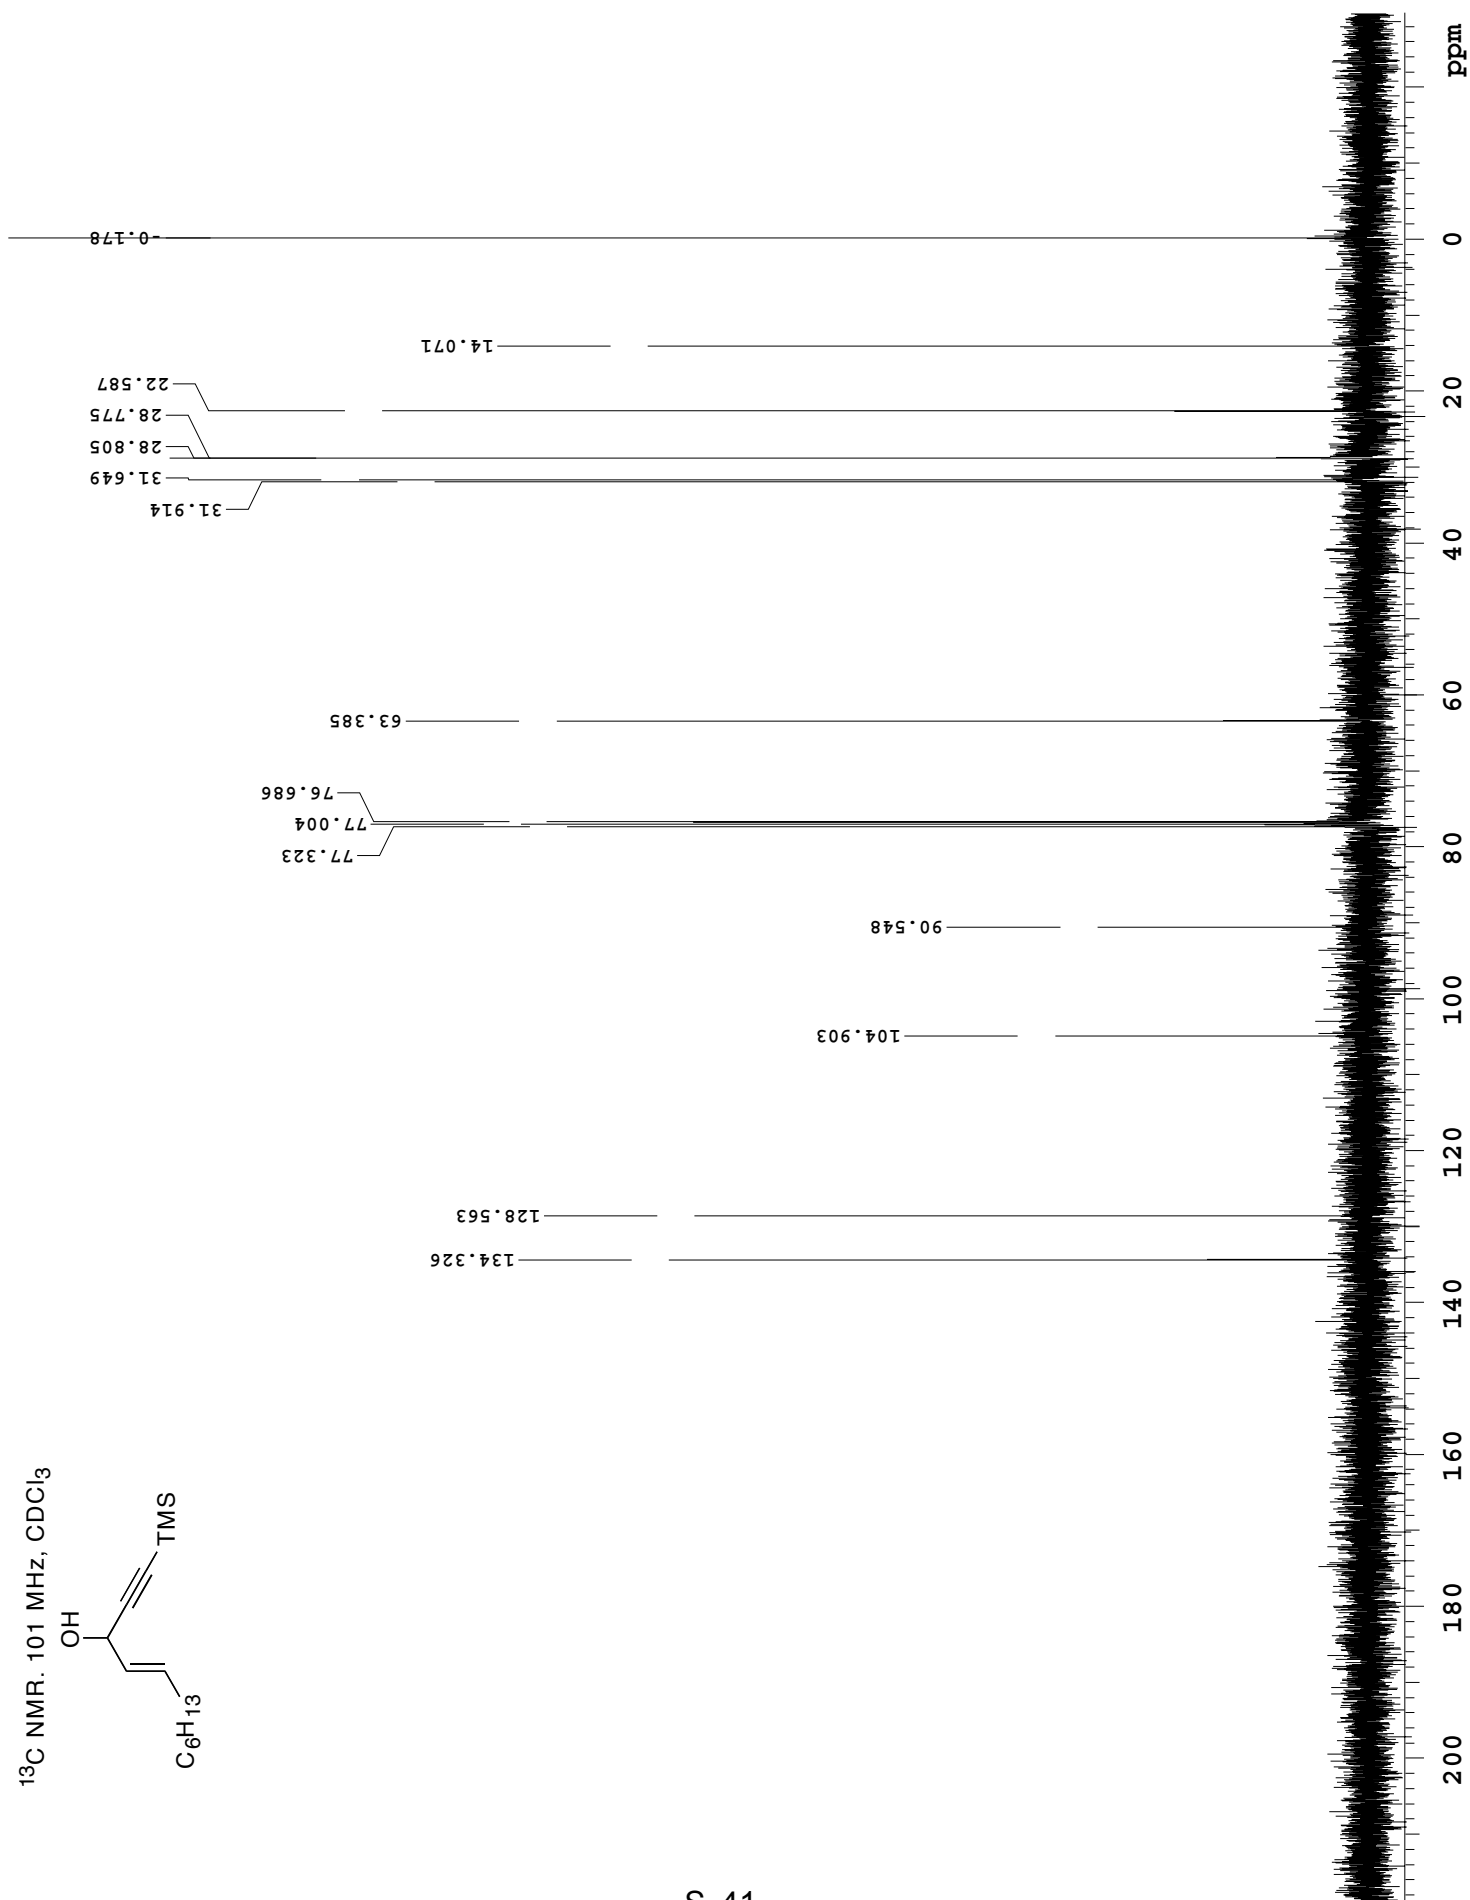

$^1\text{H}$  NMR. 400 MHz,  $\text{CDCl}_3$

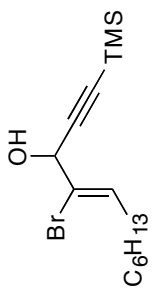

S 42

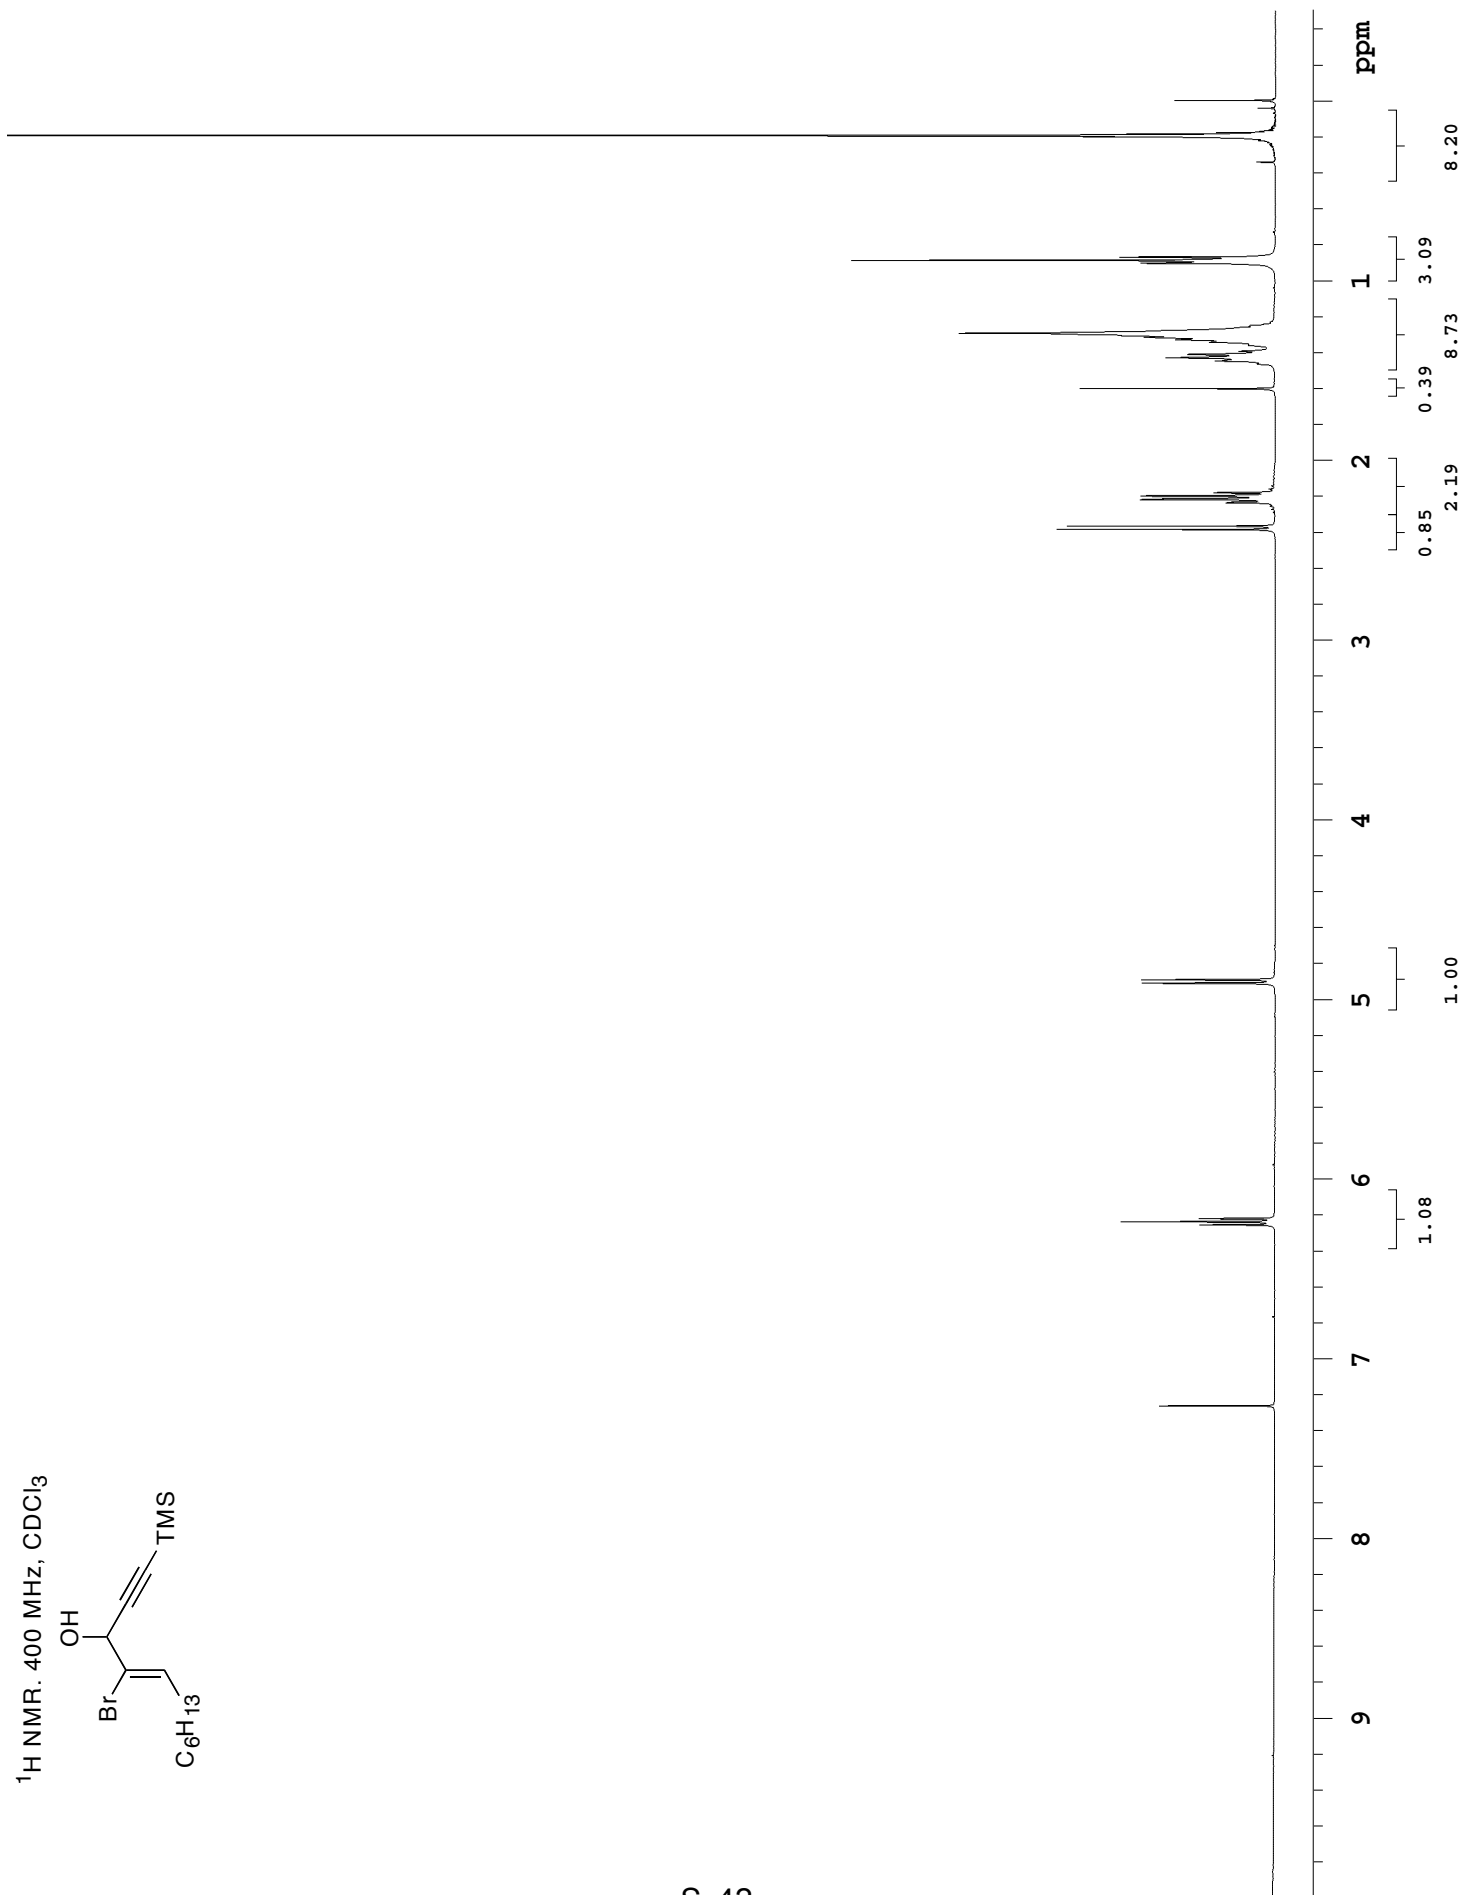

<sup>13</sup>C NMR. 101 MHz, CDCl<sub>3</sub>

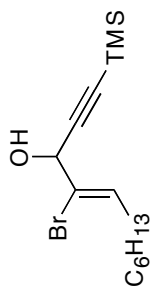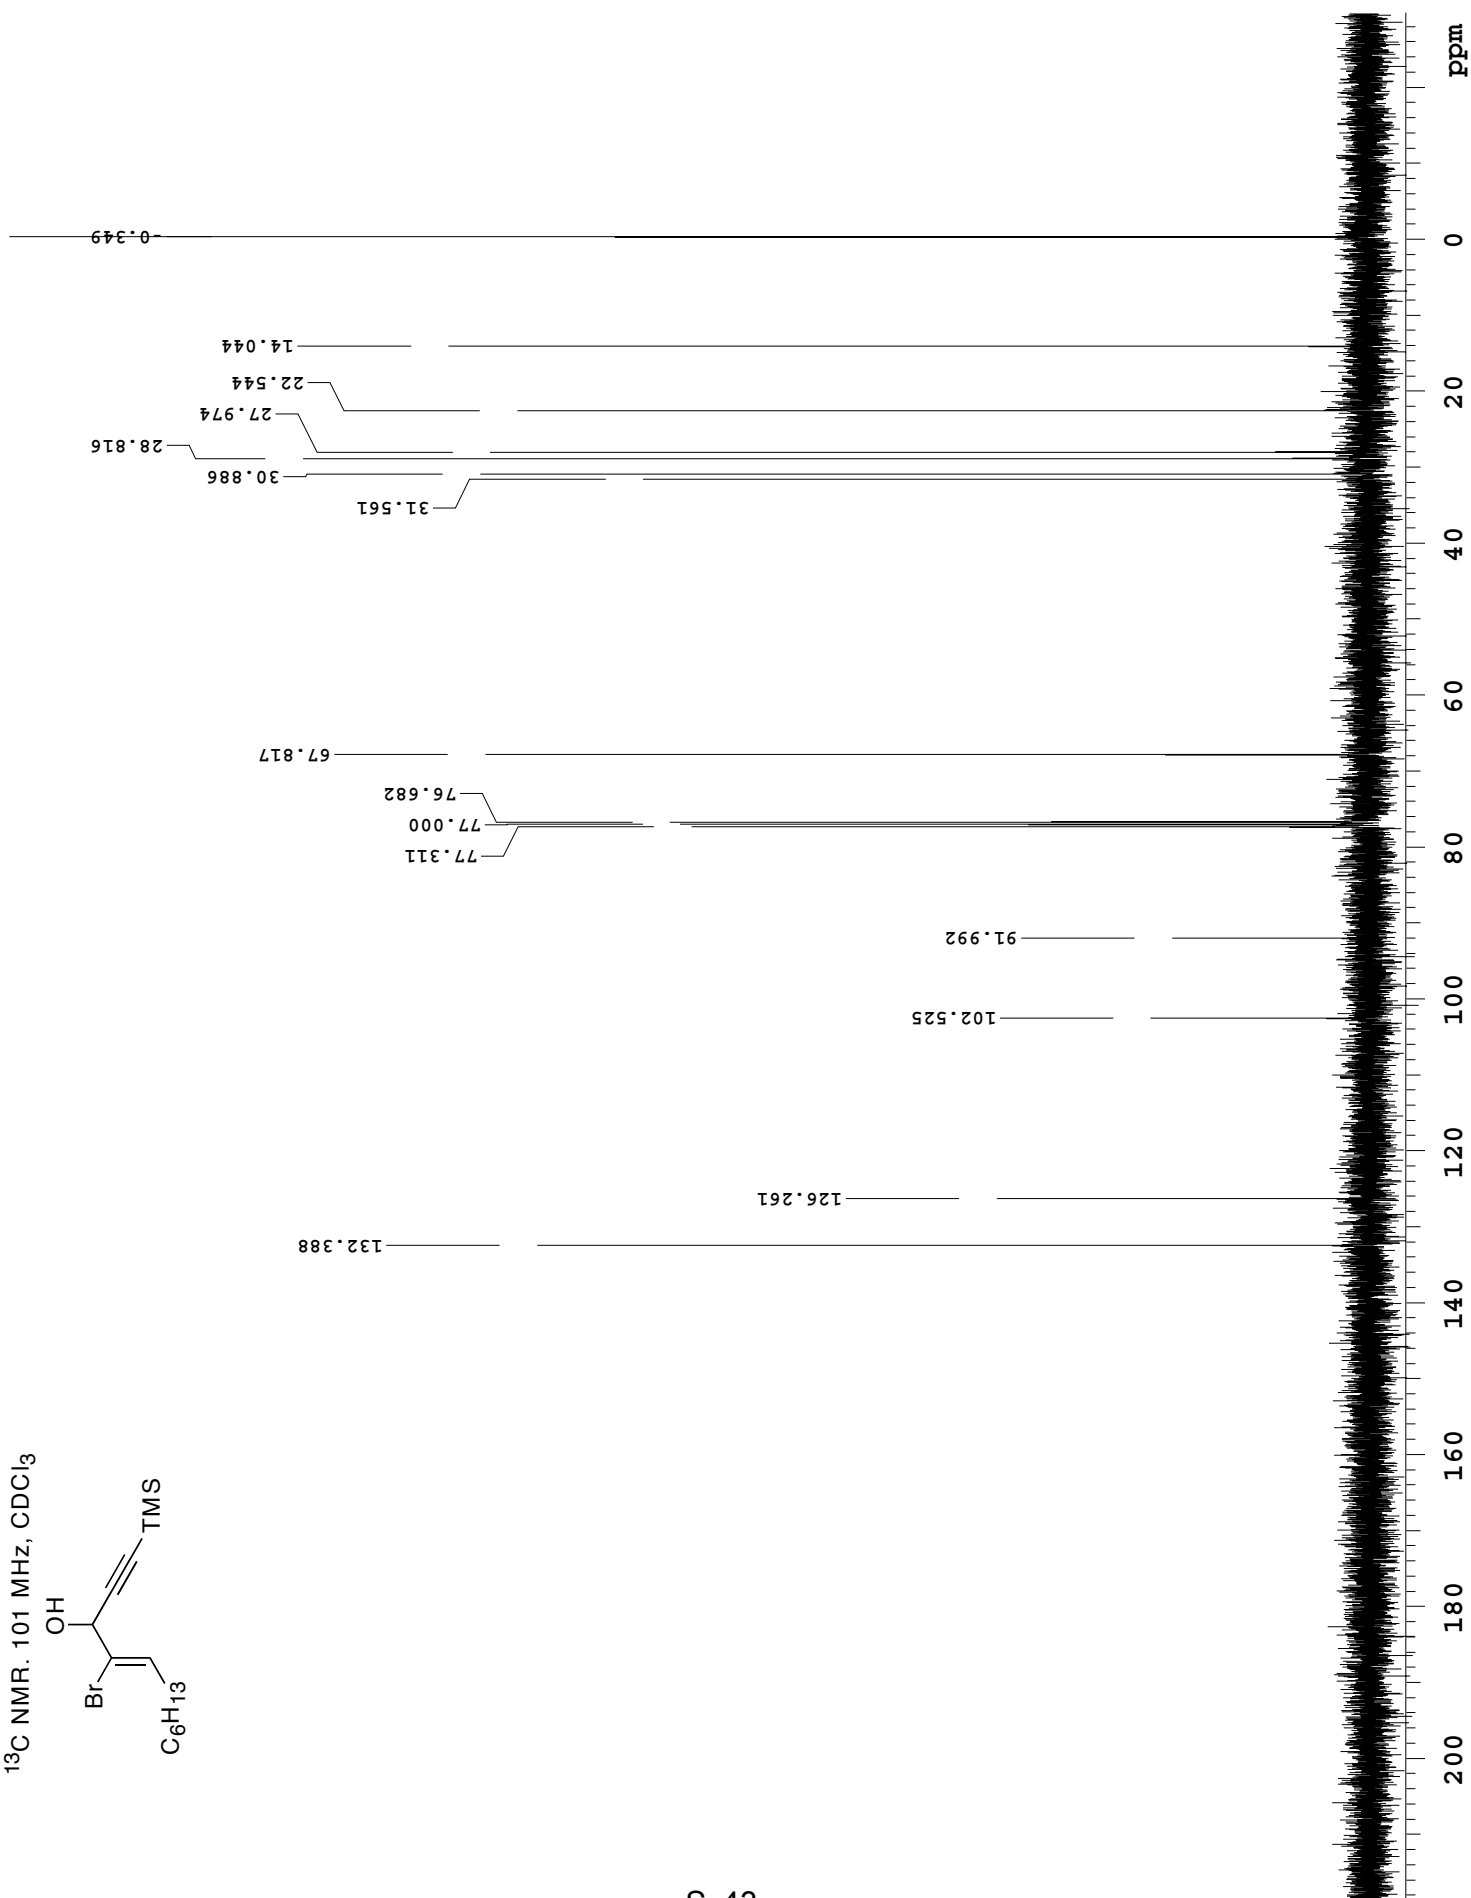

a3-198-2-1

Pulse Sequence: s2pu1

Solvent: CDCl3

Ambient temperature

NOVA-500 "u1500"

Relax. delay 1.000 sec

Pulse 60.0 degrees

Acq. time 4.000 sec

Width 8000.0 Hz

16 repetitions

observe H1: 499.7485737 MHz

DATA PROCESSING

FT size 131072

Total time 2 min, 40 sec

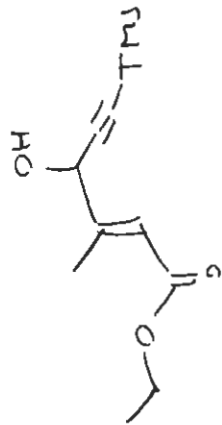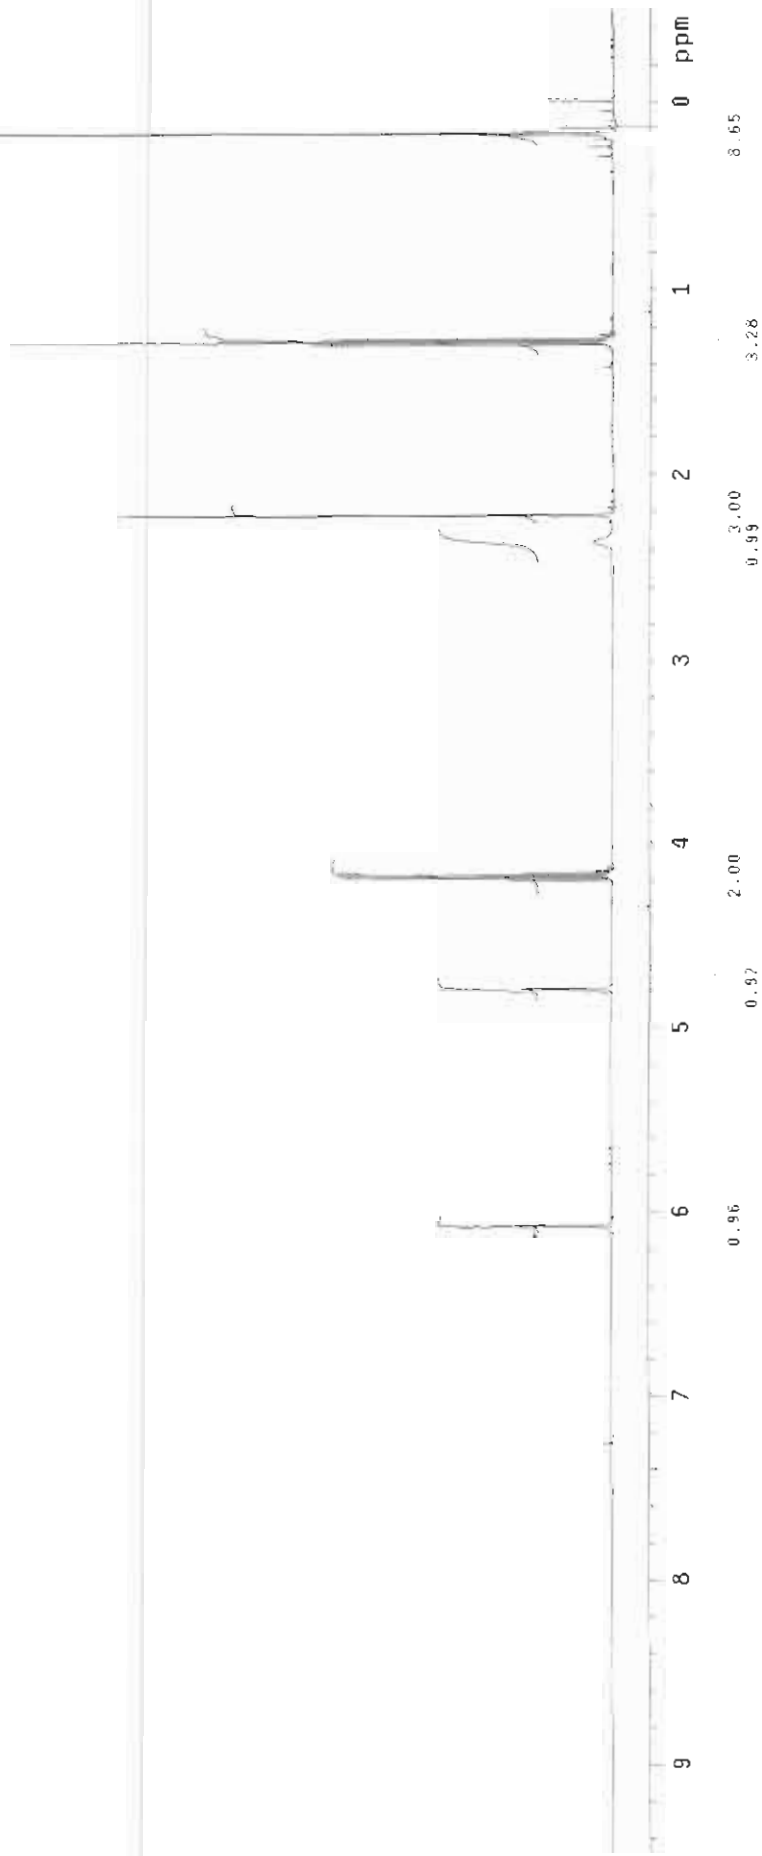

<sup>13</sup>C NMR. 101 MHz, CDCl<sub>3</sub>

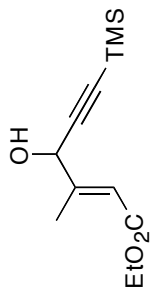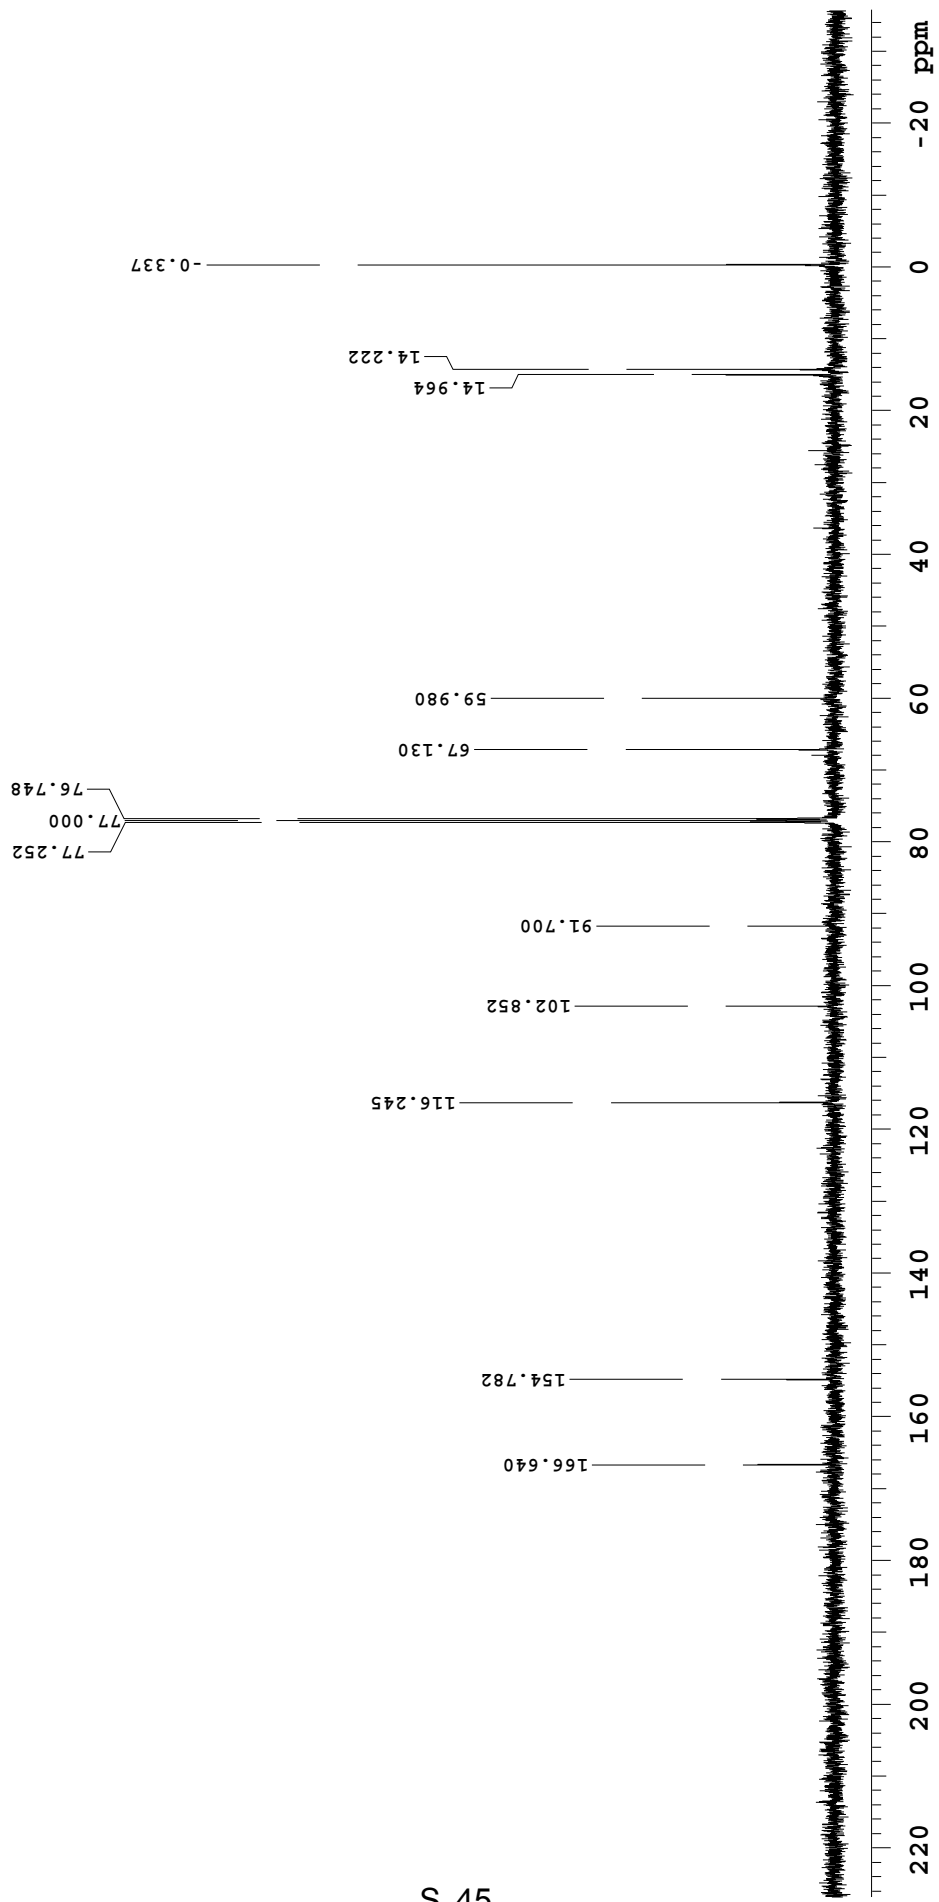

<sup>1</sup>H NMR, 400 MHz, CDCl<sub>3</sub>

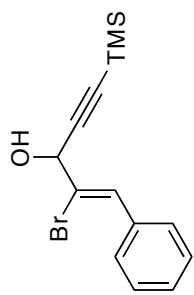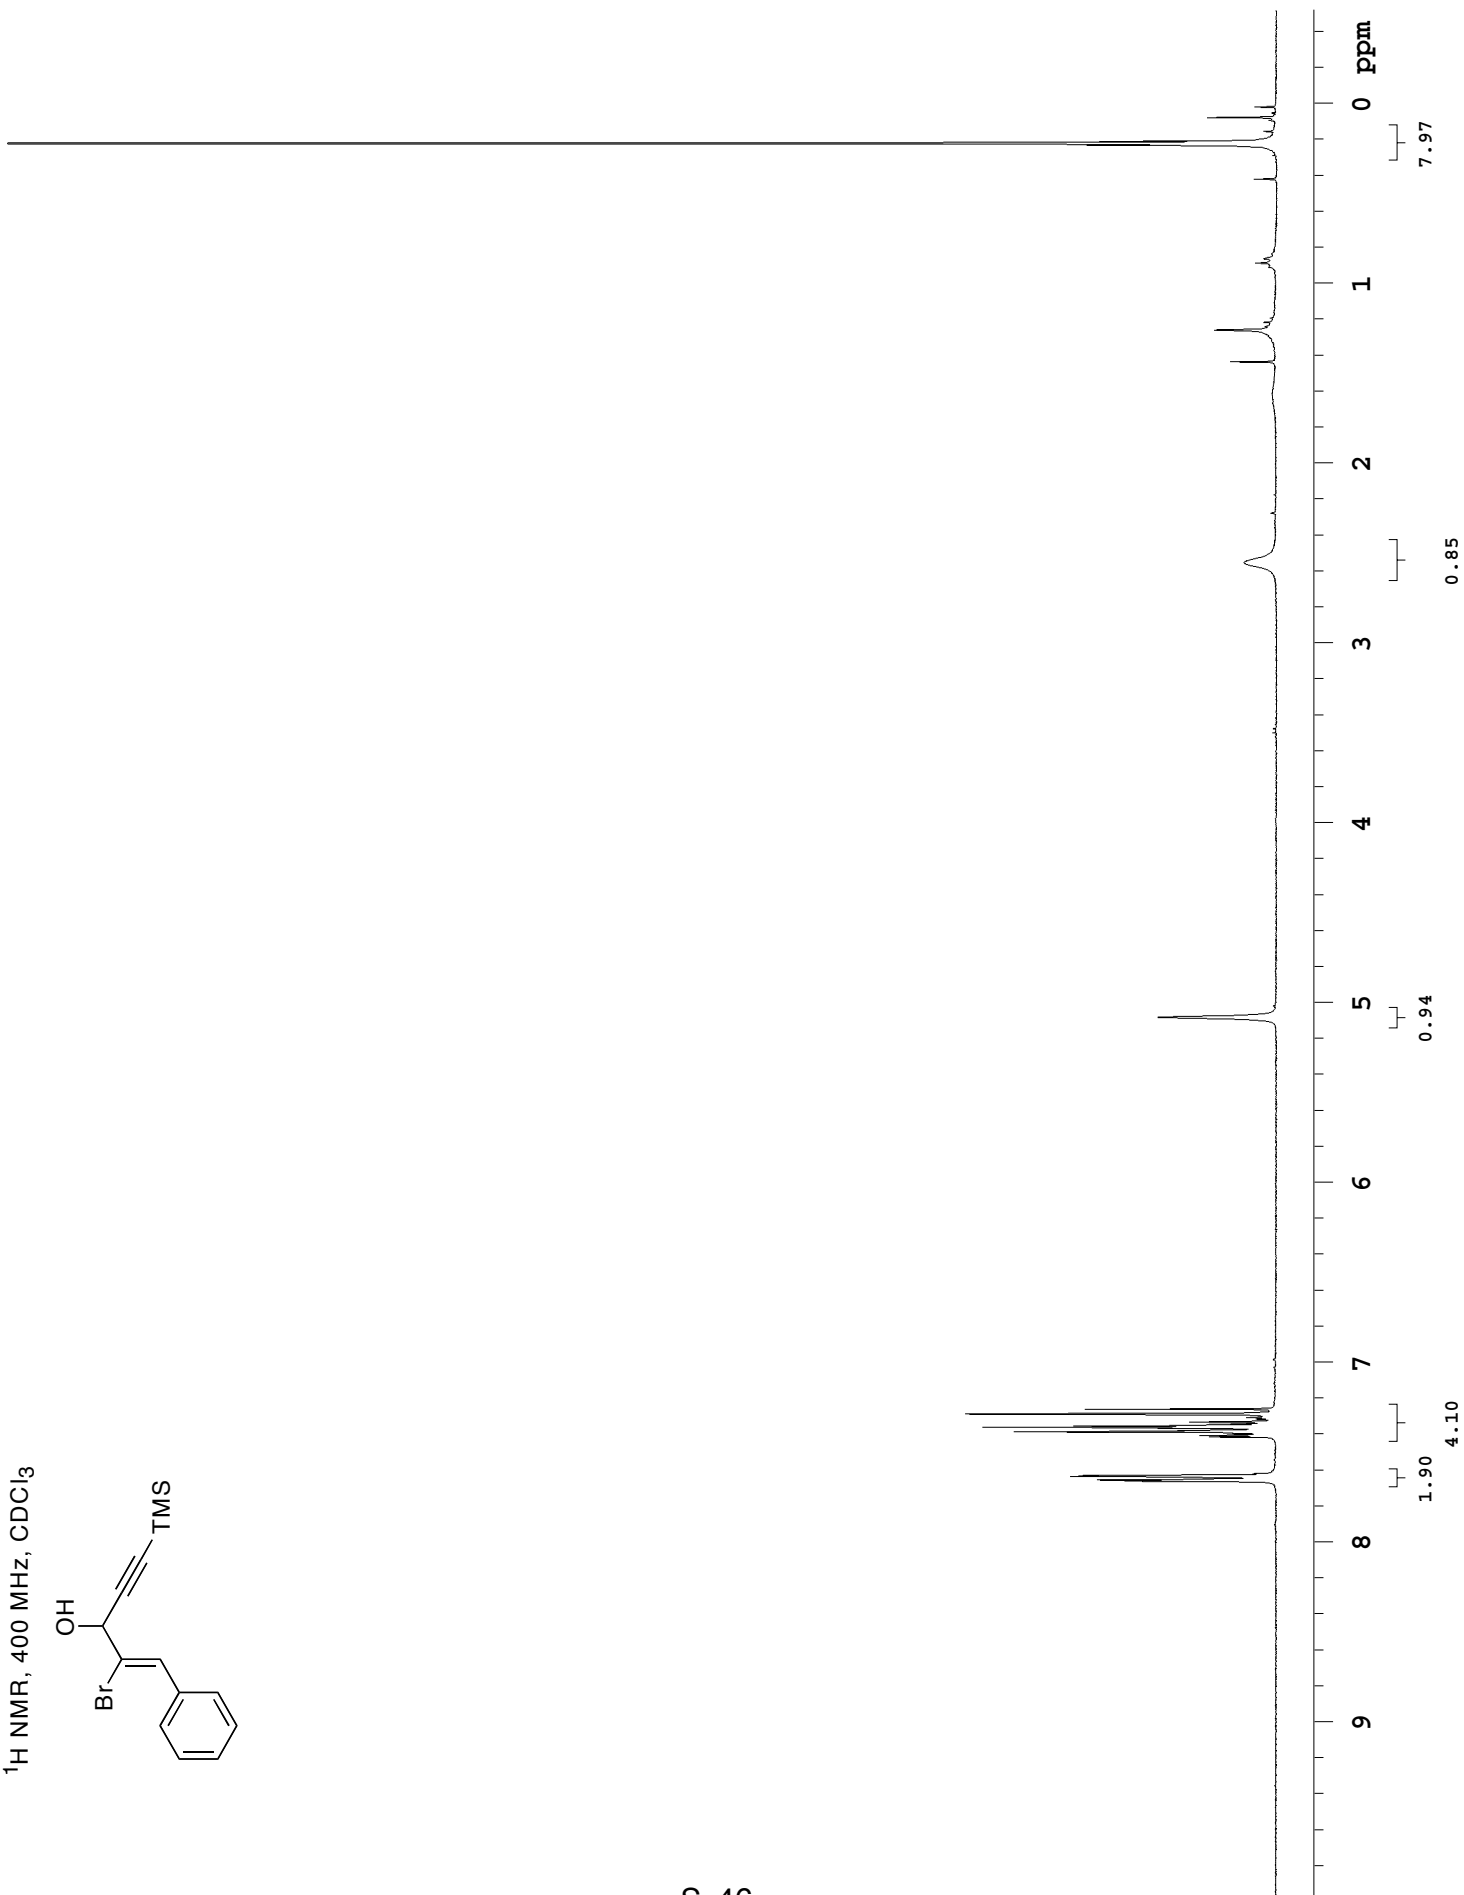

<sup>13</sup>C NMR. 101 MHz, CDCl<sub>3</sub>

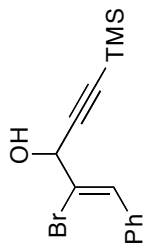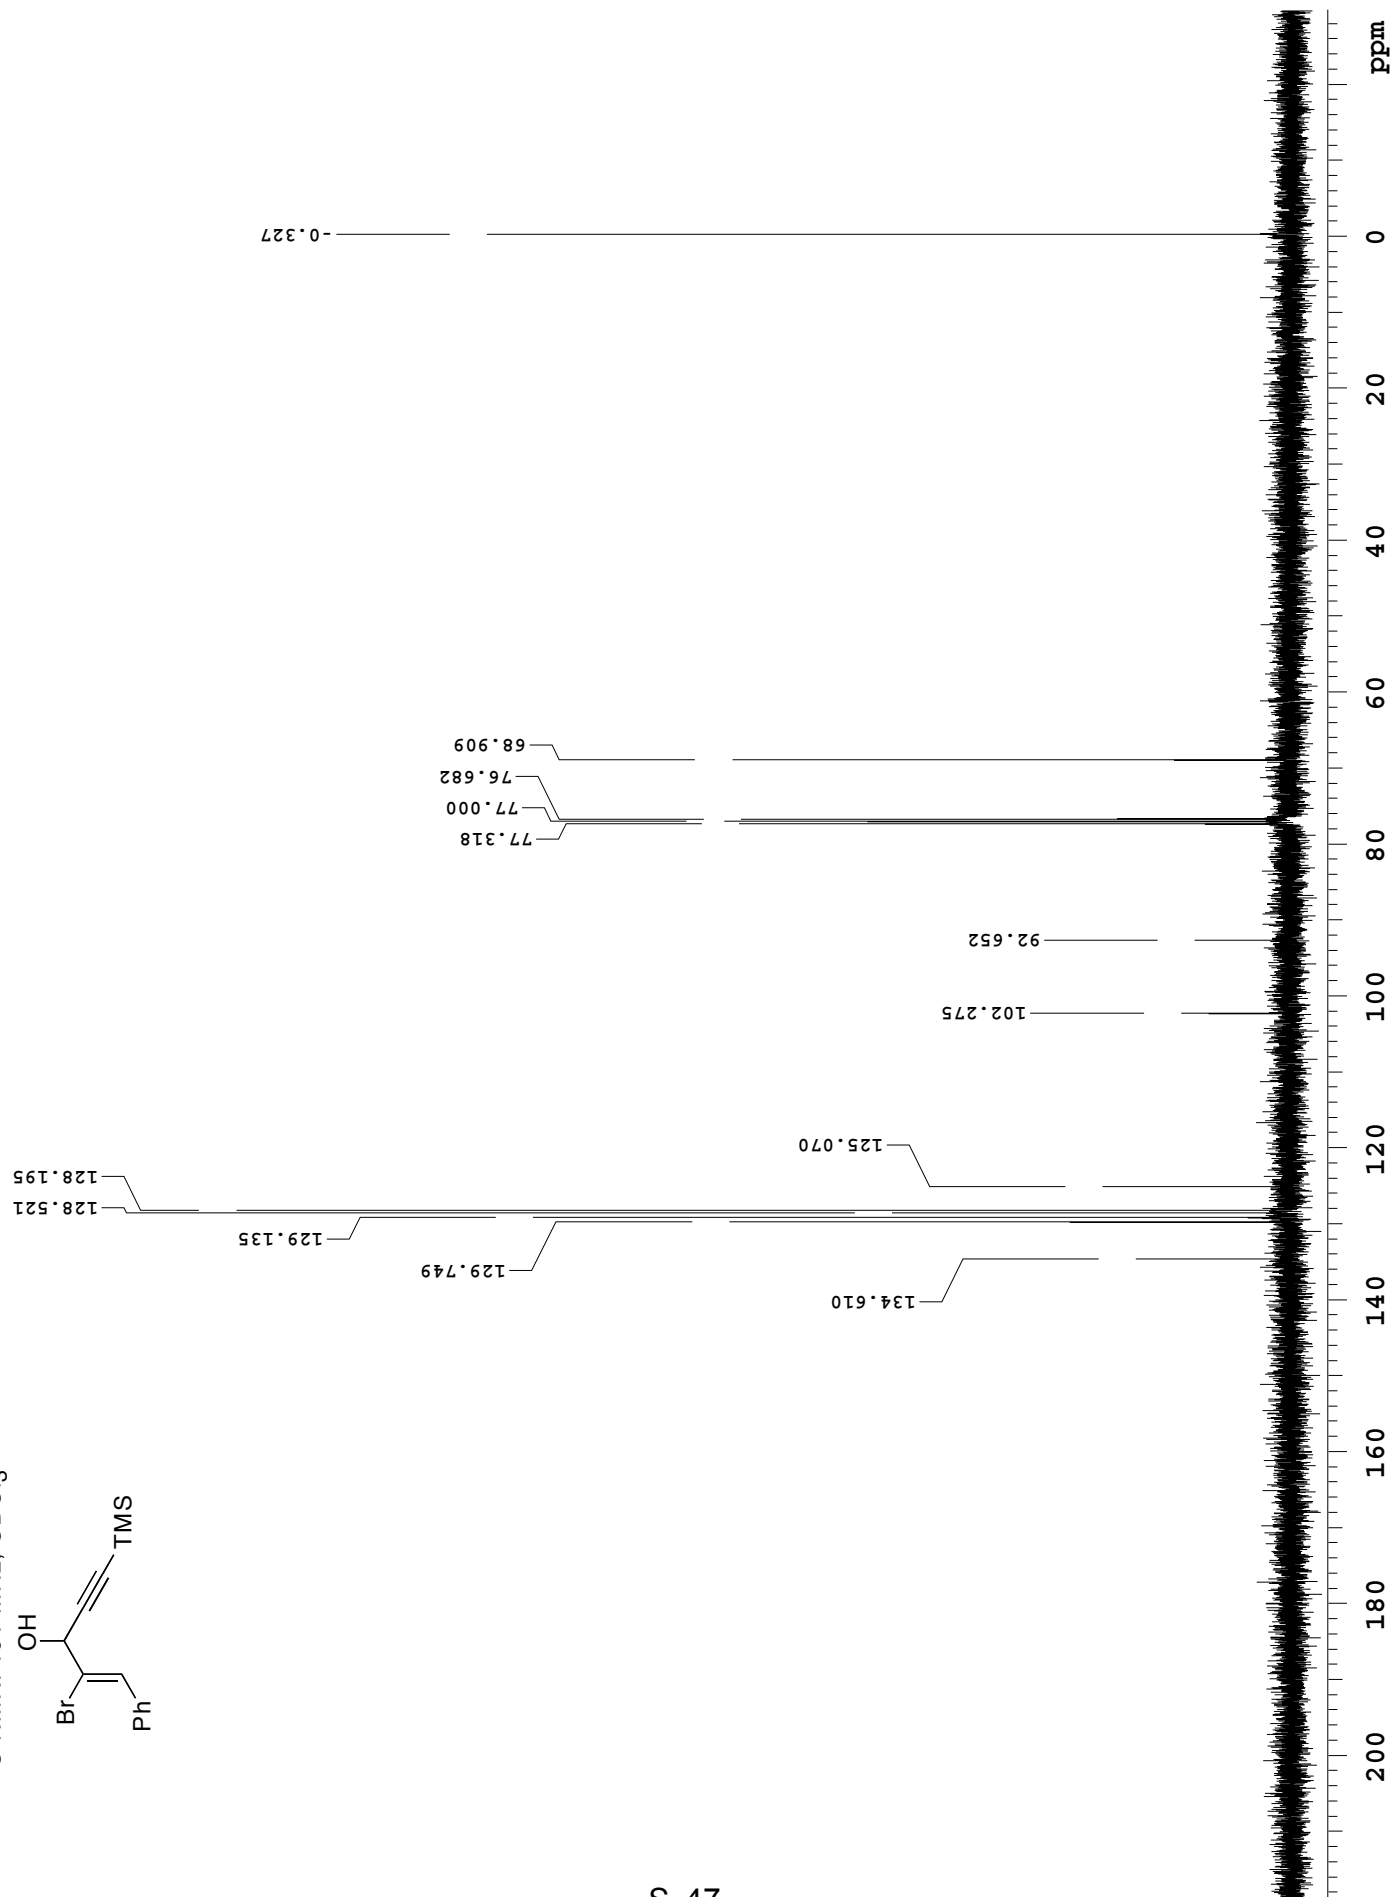

a3-201-1

Pulse Sequence: s2pu1  
Solvent: CDCl3  
Ambient temperature  
INOVA-500 "uj500"

Relax. delay 1.000 sec  
Pulse 60.0 degrees  
Acq. time 4.000 sec  
Width 8000.0 Hz  
20 repetitions  
OBSERVE HI, 499.7485689 MHz  
DATA PROCESSING  
FT size 131072  
Total time 2 min, 40 sec

<sup>1</sup>H NMR. 500 MHz, CDCl<sub>3</sub>

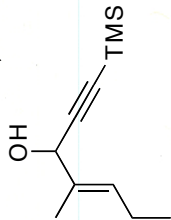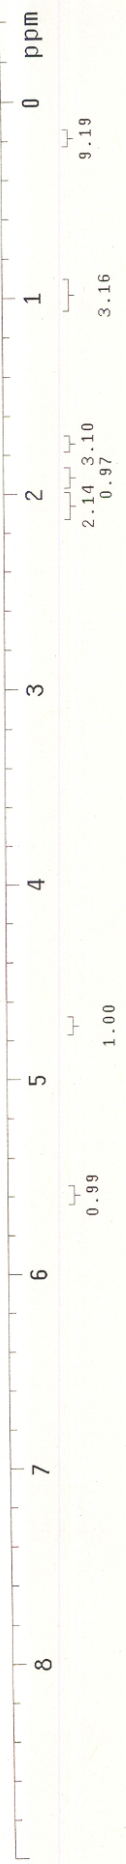



<sup>13</sup>C NMR. 126 MHz, CDCl<sub>3</sub>

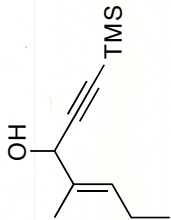

Pulse Sequence: s2pul  
Solvent: CDCl<sub>3</sub>  
Ambient temperature  
User: 1-15-87  
INOVA-500 "ui500"

Relax. delay 2.000 sec  
Pulse 33.3 degrees  
Acq. time 1.500 sec  
Width 33003.3 Hz  
24 repetitions  
OBSERVE C13, 125.6618668 MHz  
DECOUPLE H1, 499.7505605 MHz  
Power 42 dB  
continuously on  
WALTZ-16 modulated  
DATA PROCESSING  
Line broadening 2.0 Hz  
FI size 131072  
Total time 7 min, 29 sec

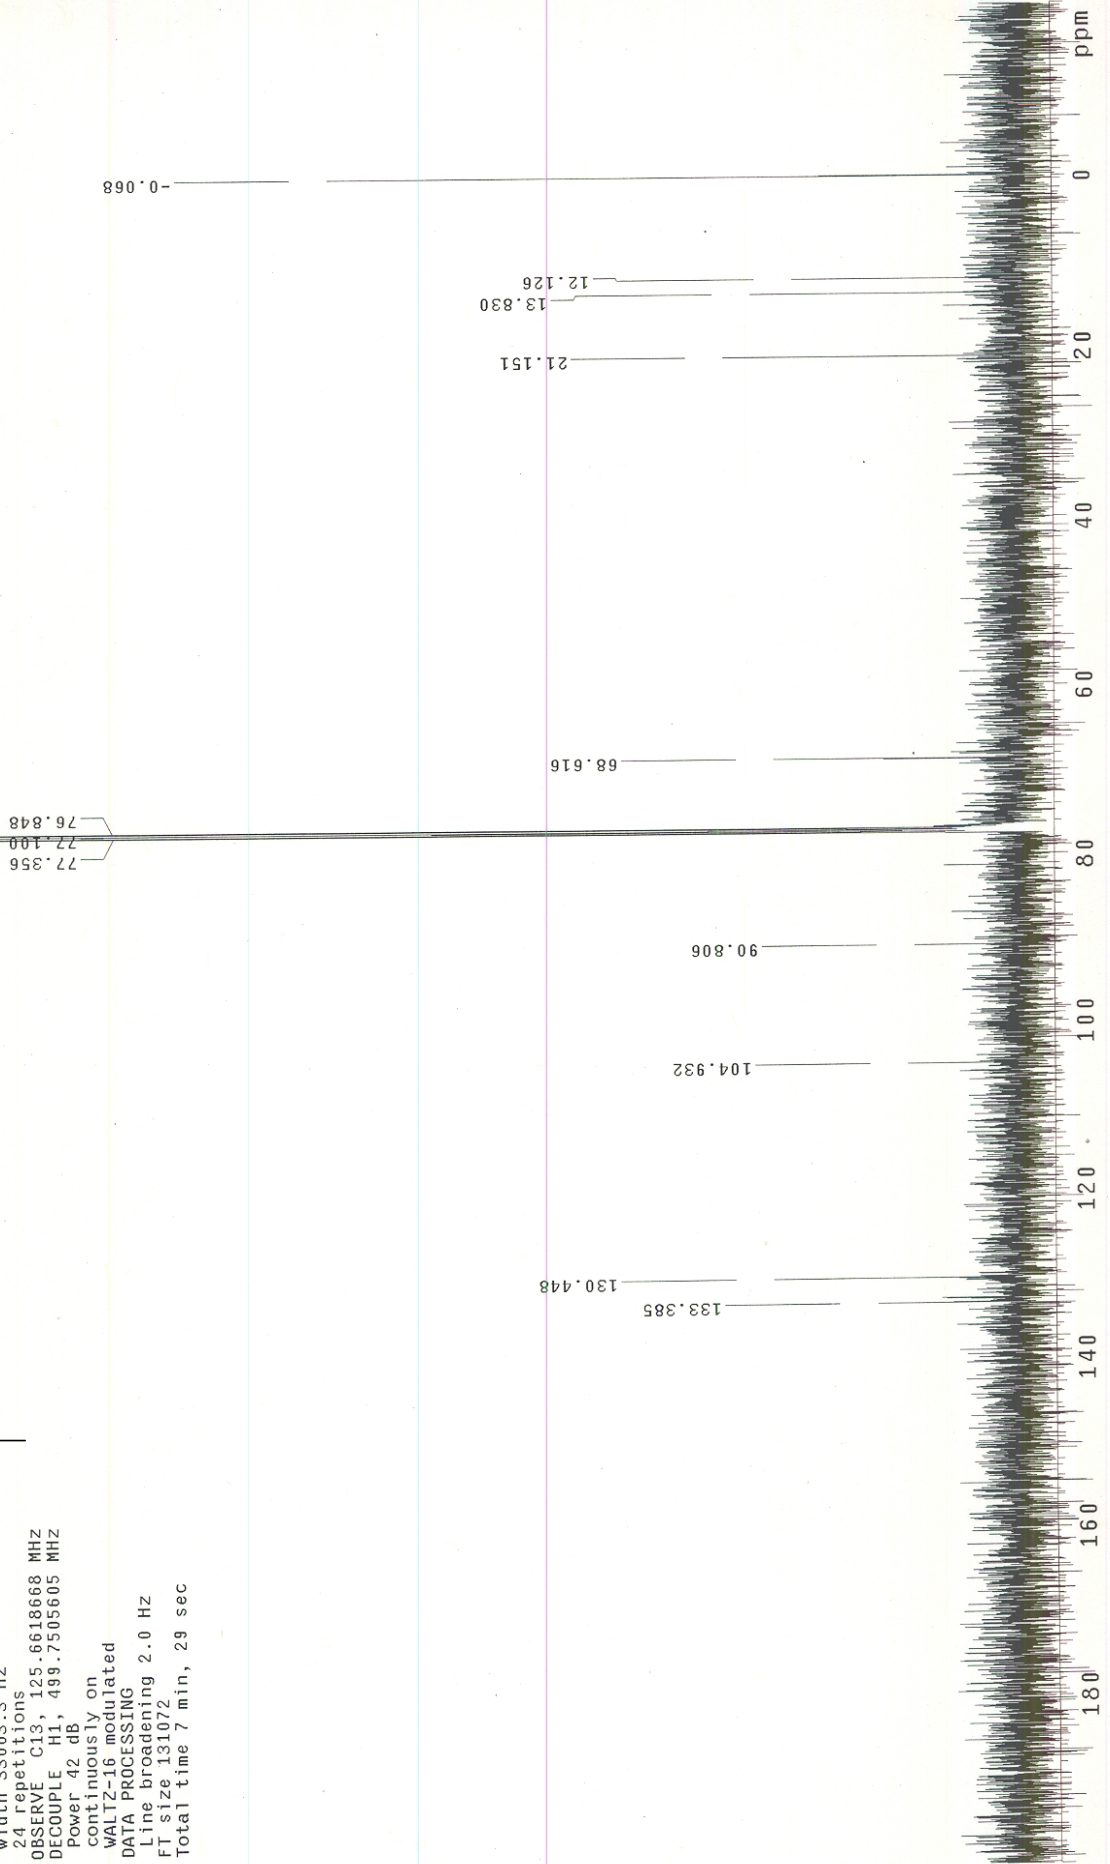

$^1\text{H}$  NMR: 500 MHz,  $\text{CDCl}_3$

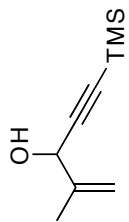

S 50

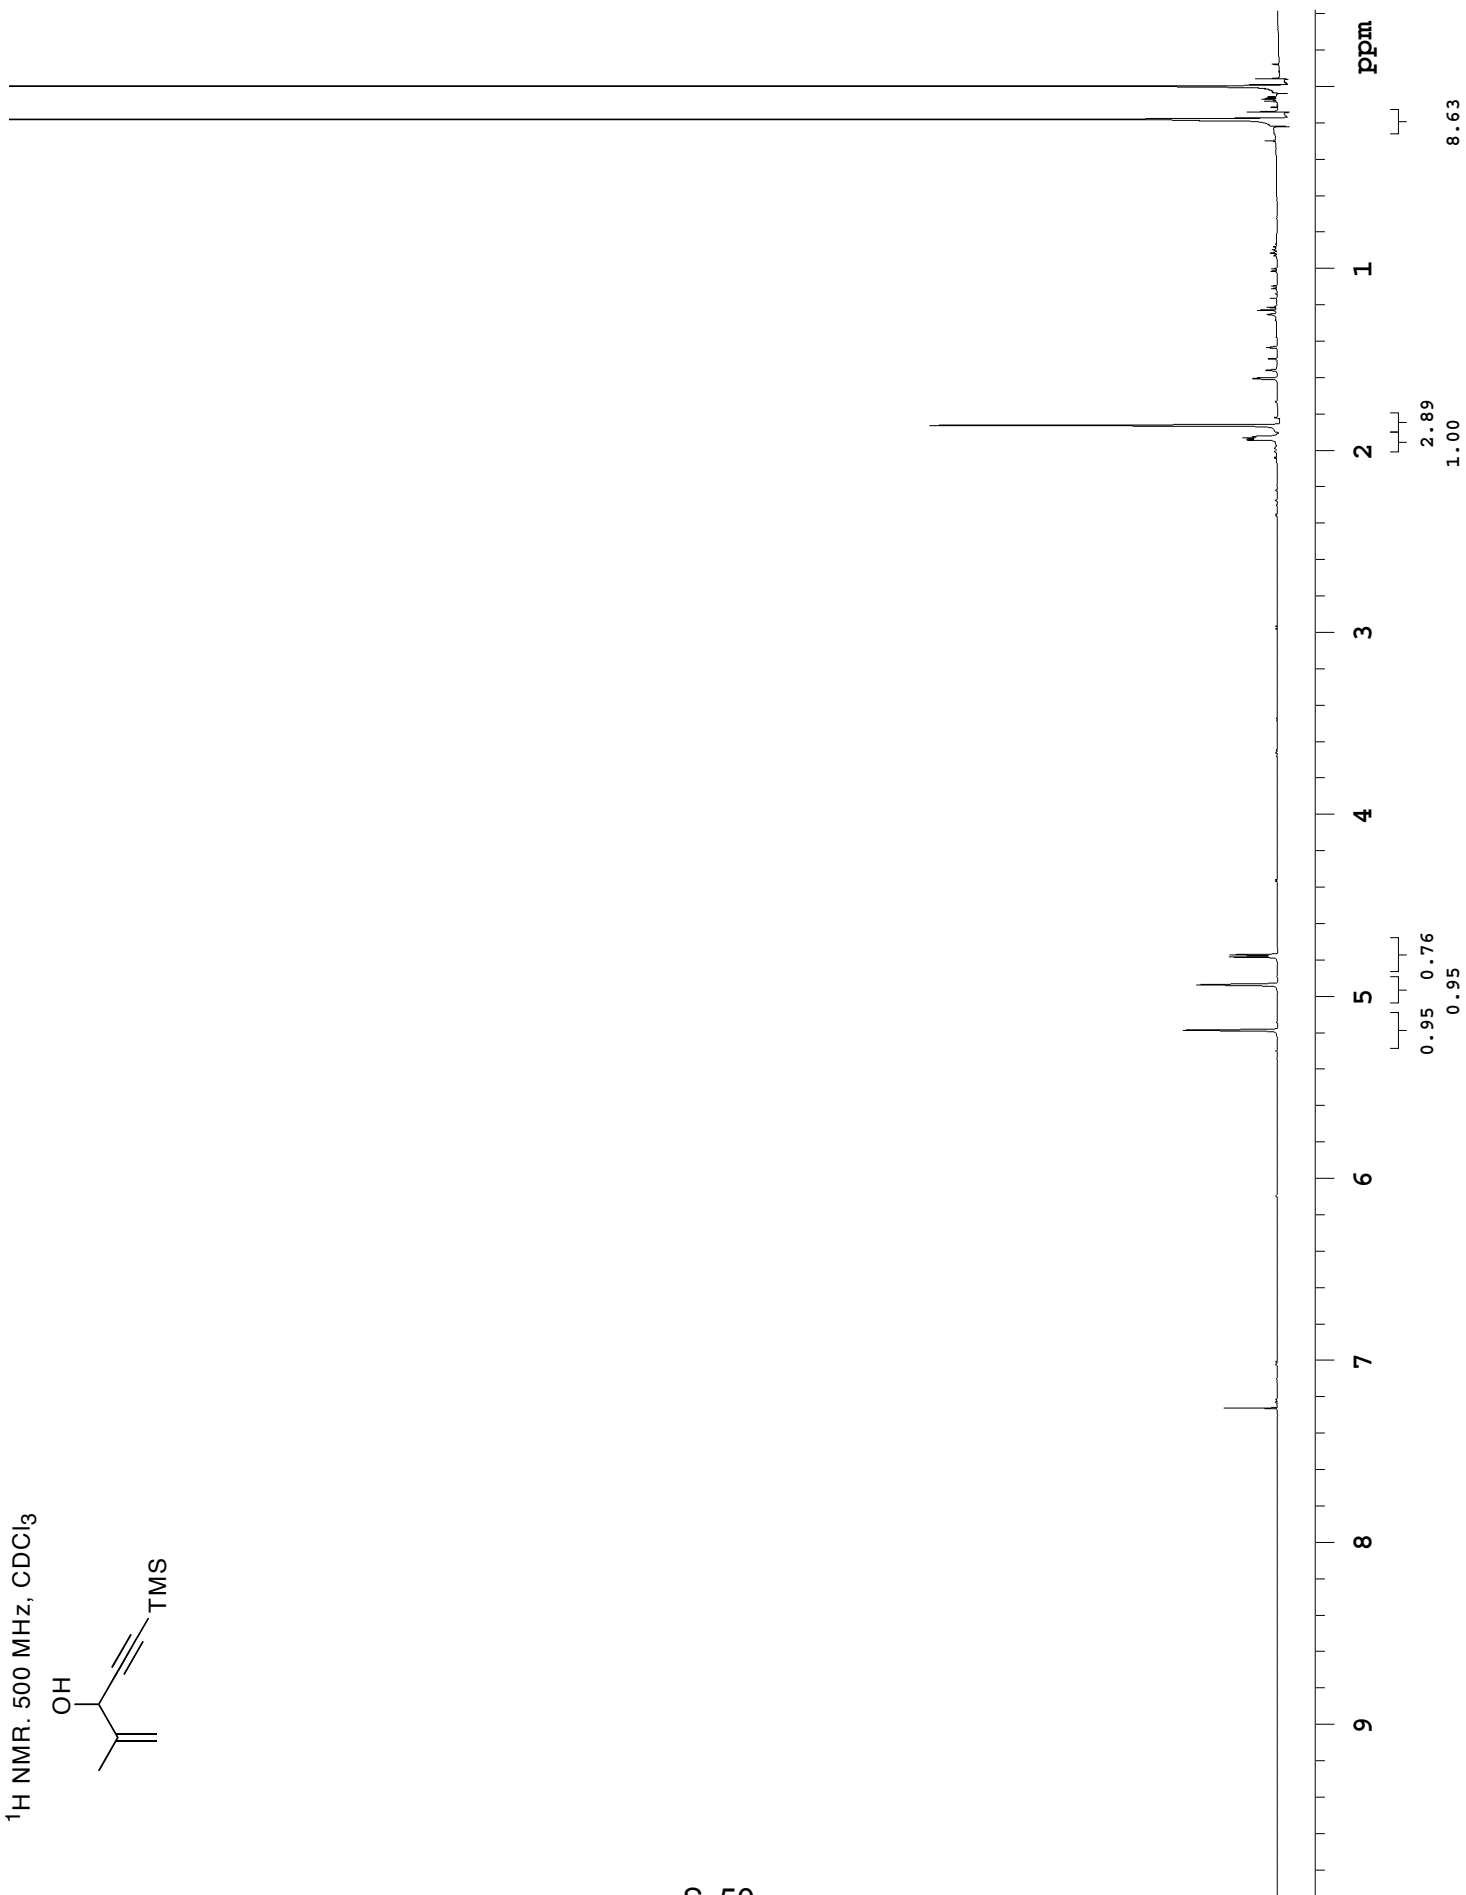

03-198-1

Pulse Sequence: s2pu1

Solvent: CDCl3

Ambient temperature

User: J-15-87

INOVA-500 "ul500"

Relax. delay 2.000 sec

Pulse 33.3 degrees

Acq. time 1.500 sec

Width 33003.3 Hz

300 repetitions

OBSERVE C13, 125.6618673 MHz

DECOUPLE H1, 499.7505605 MHz

Power 42 dB

continuously on

WALTZ-16 modulated

DATA PROCESSING

Line broadening 2.0 Hz

FT size 131072

Total time 29 min, 56 sec

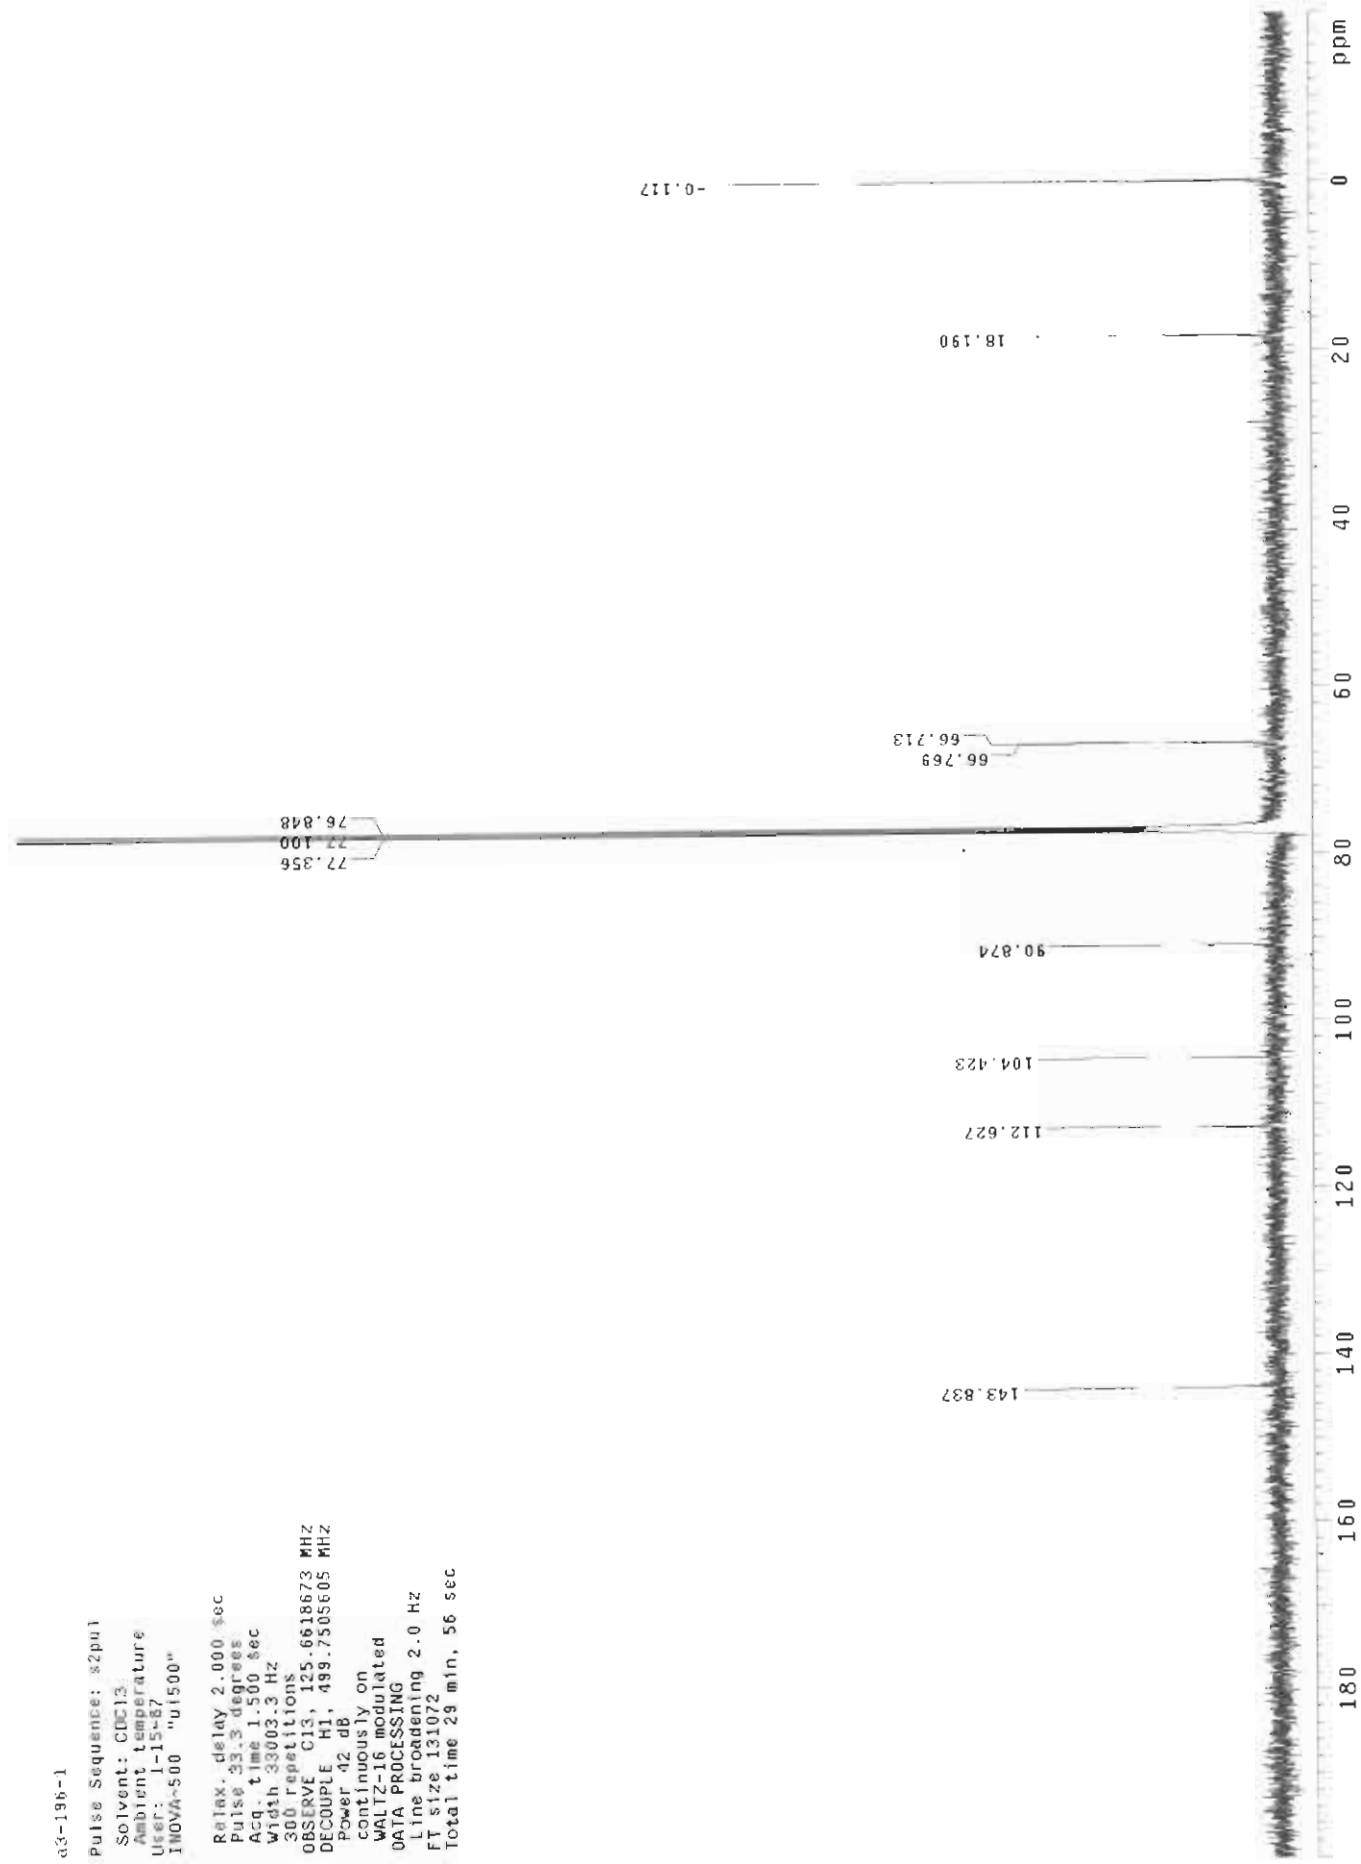

$^1\text{H}$  NMR, 500 MHz,  $\text{CDCl}_3$

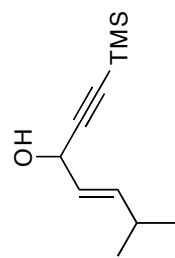

S 52

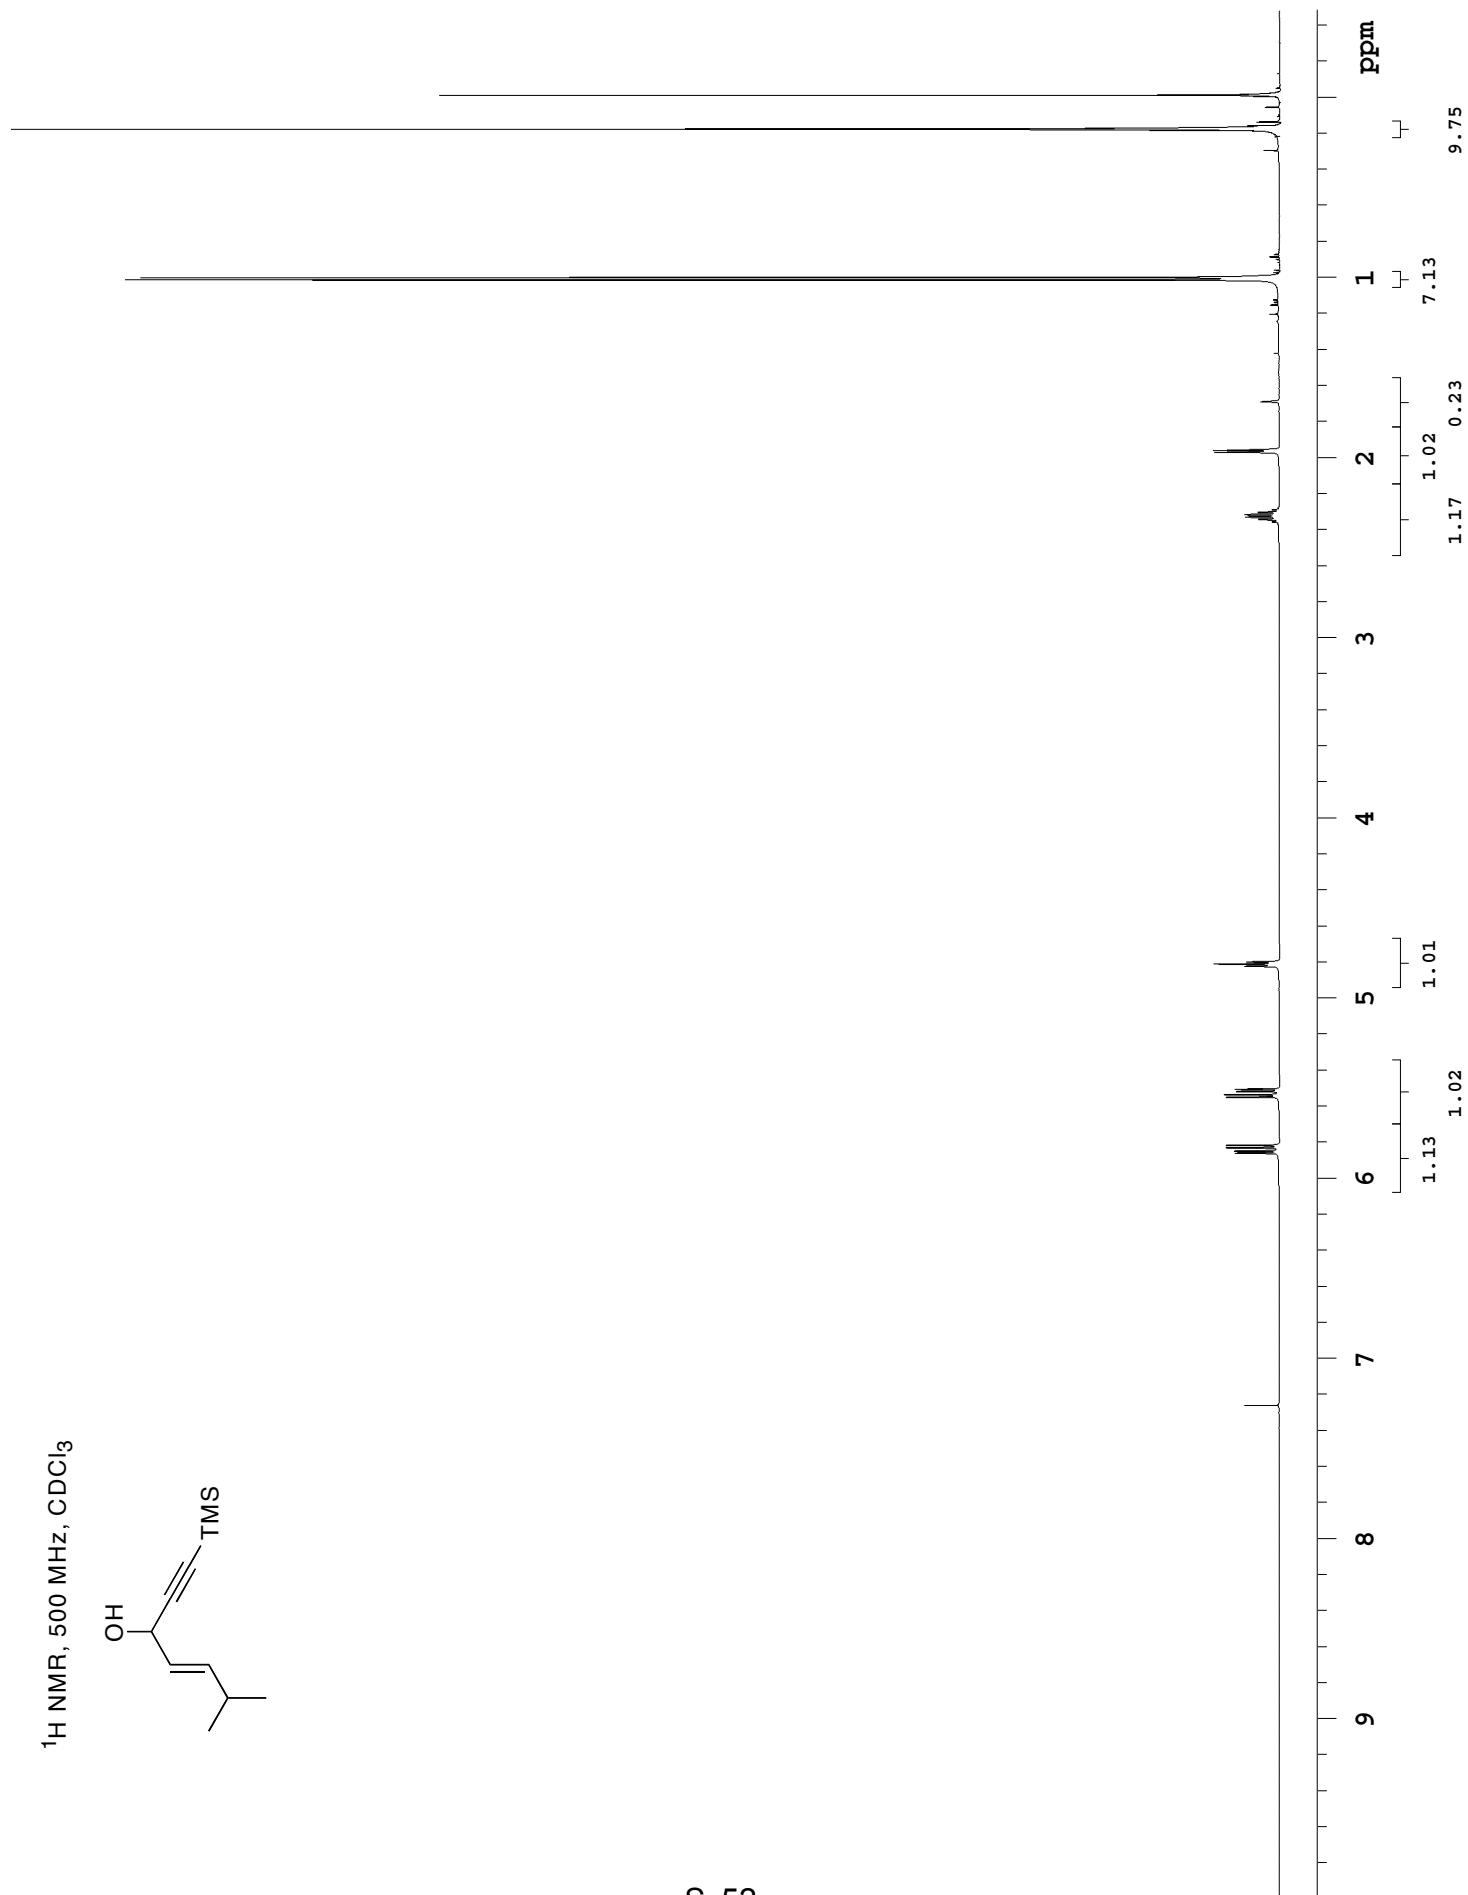

<sup>13</sup>C NMR. 101 MHz, CDCl<sub>3</sub>

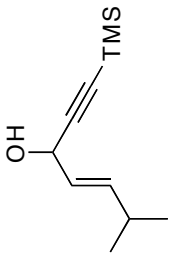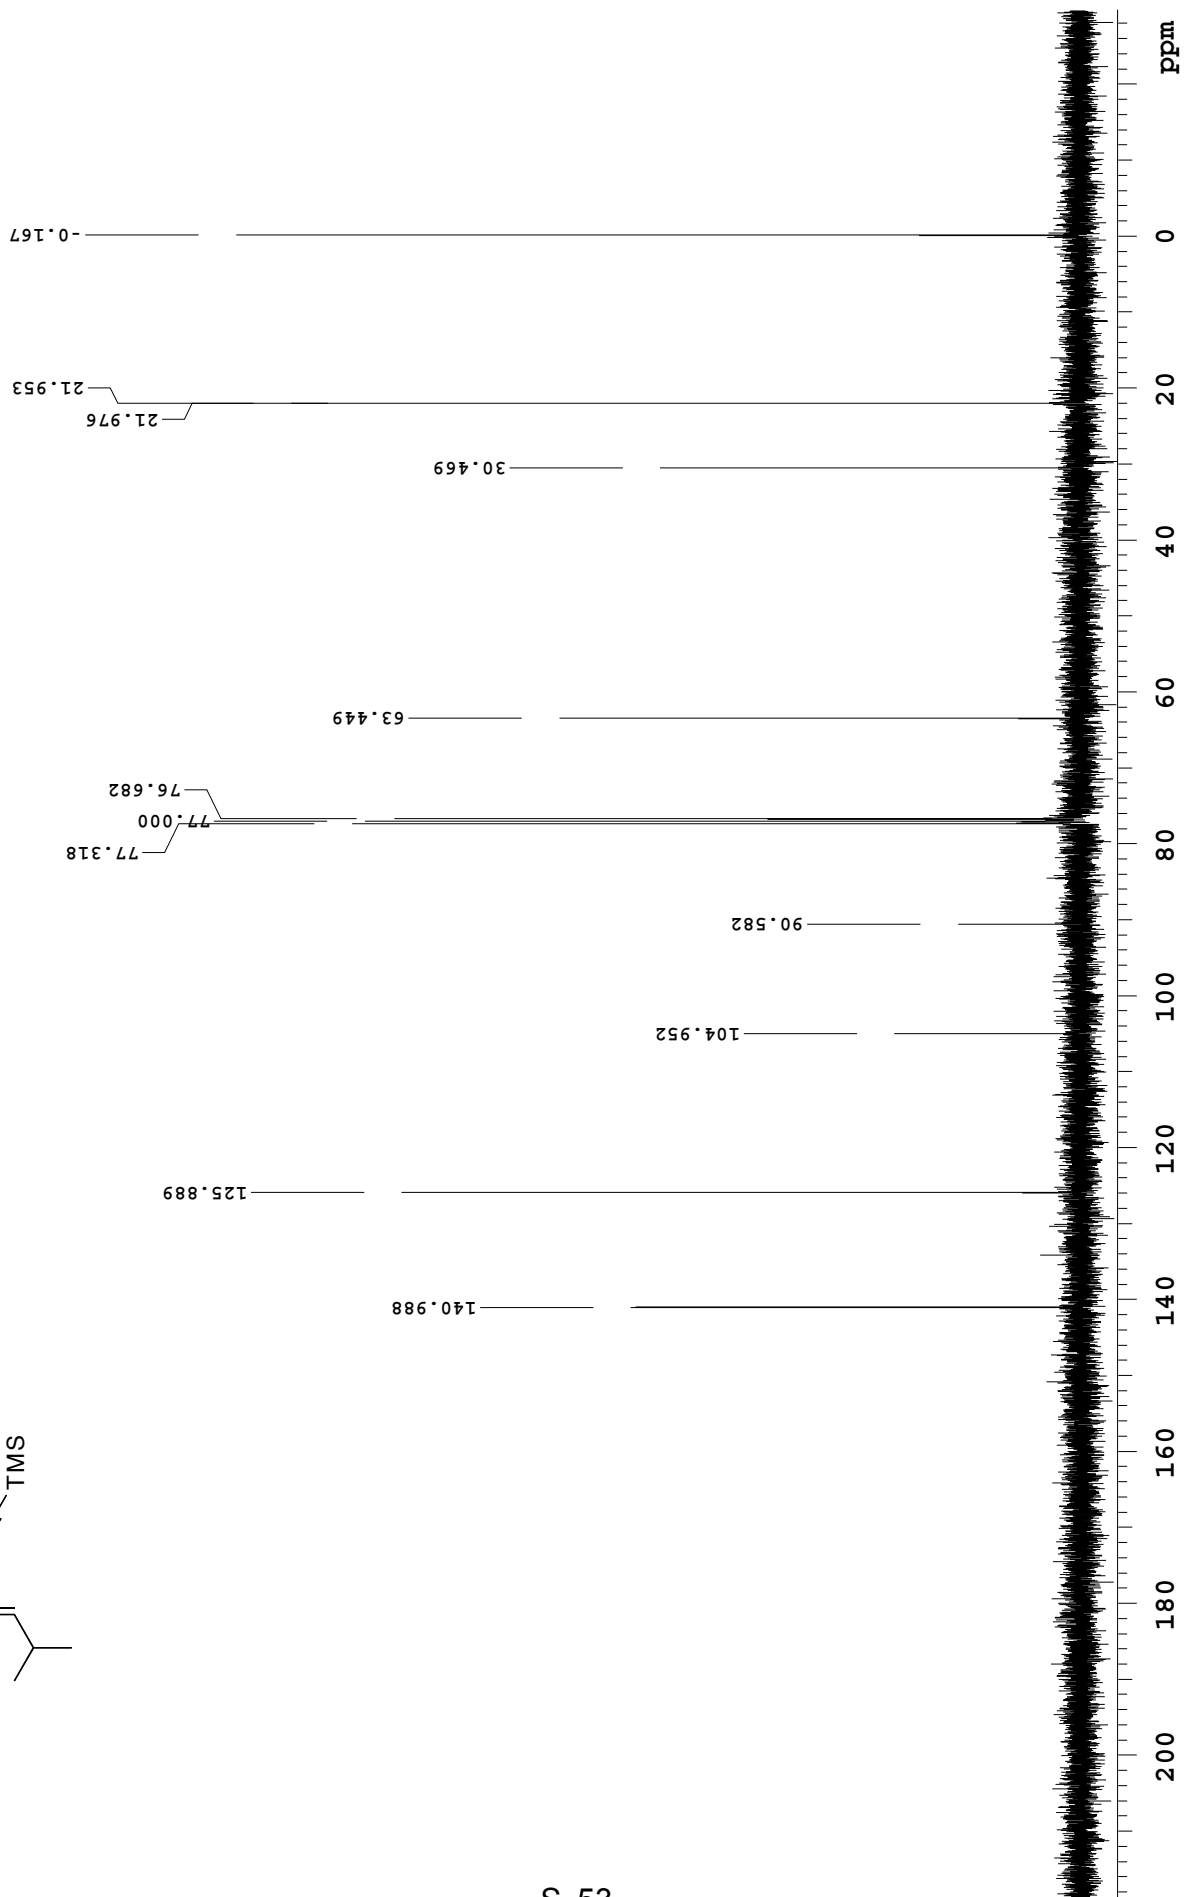

$^1\text{H}$  NMR, 400 MHz,  $\text{CDCl}_3$

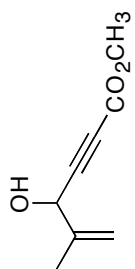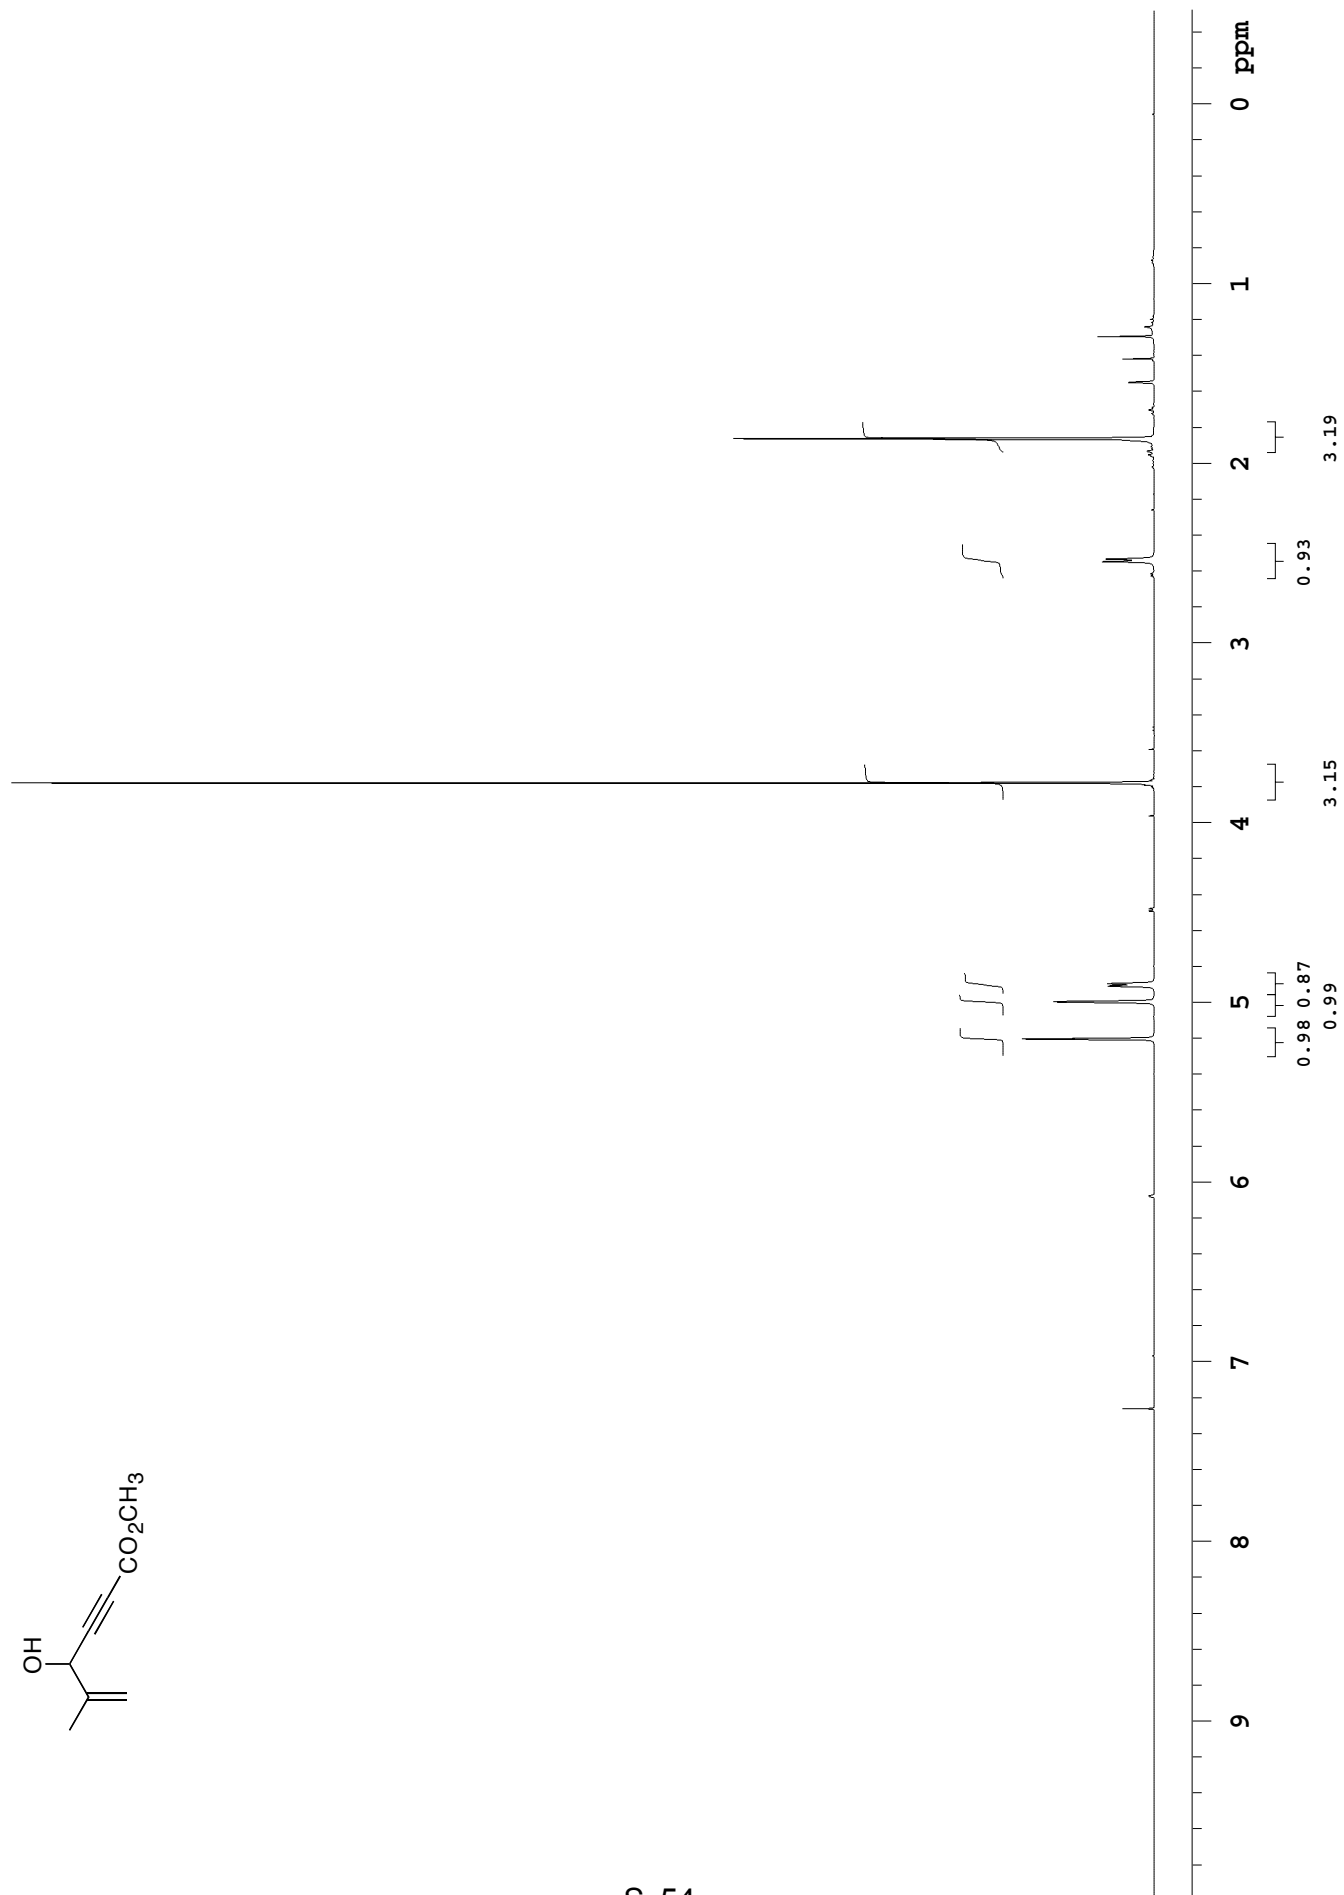

$^{13}\text{C}$  NMR. 101 MHz,  $\text{CDCl}_3$

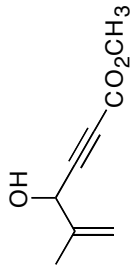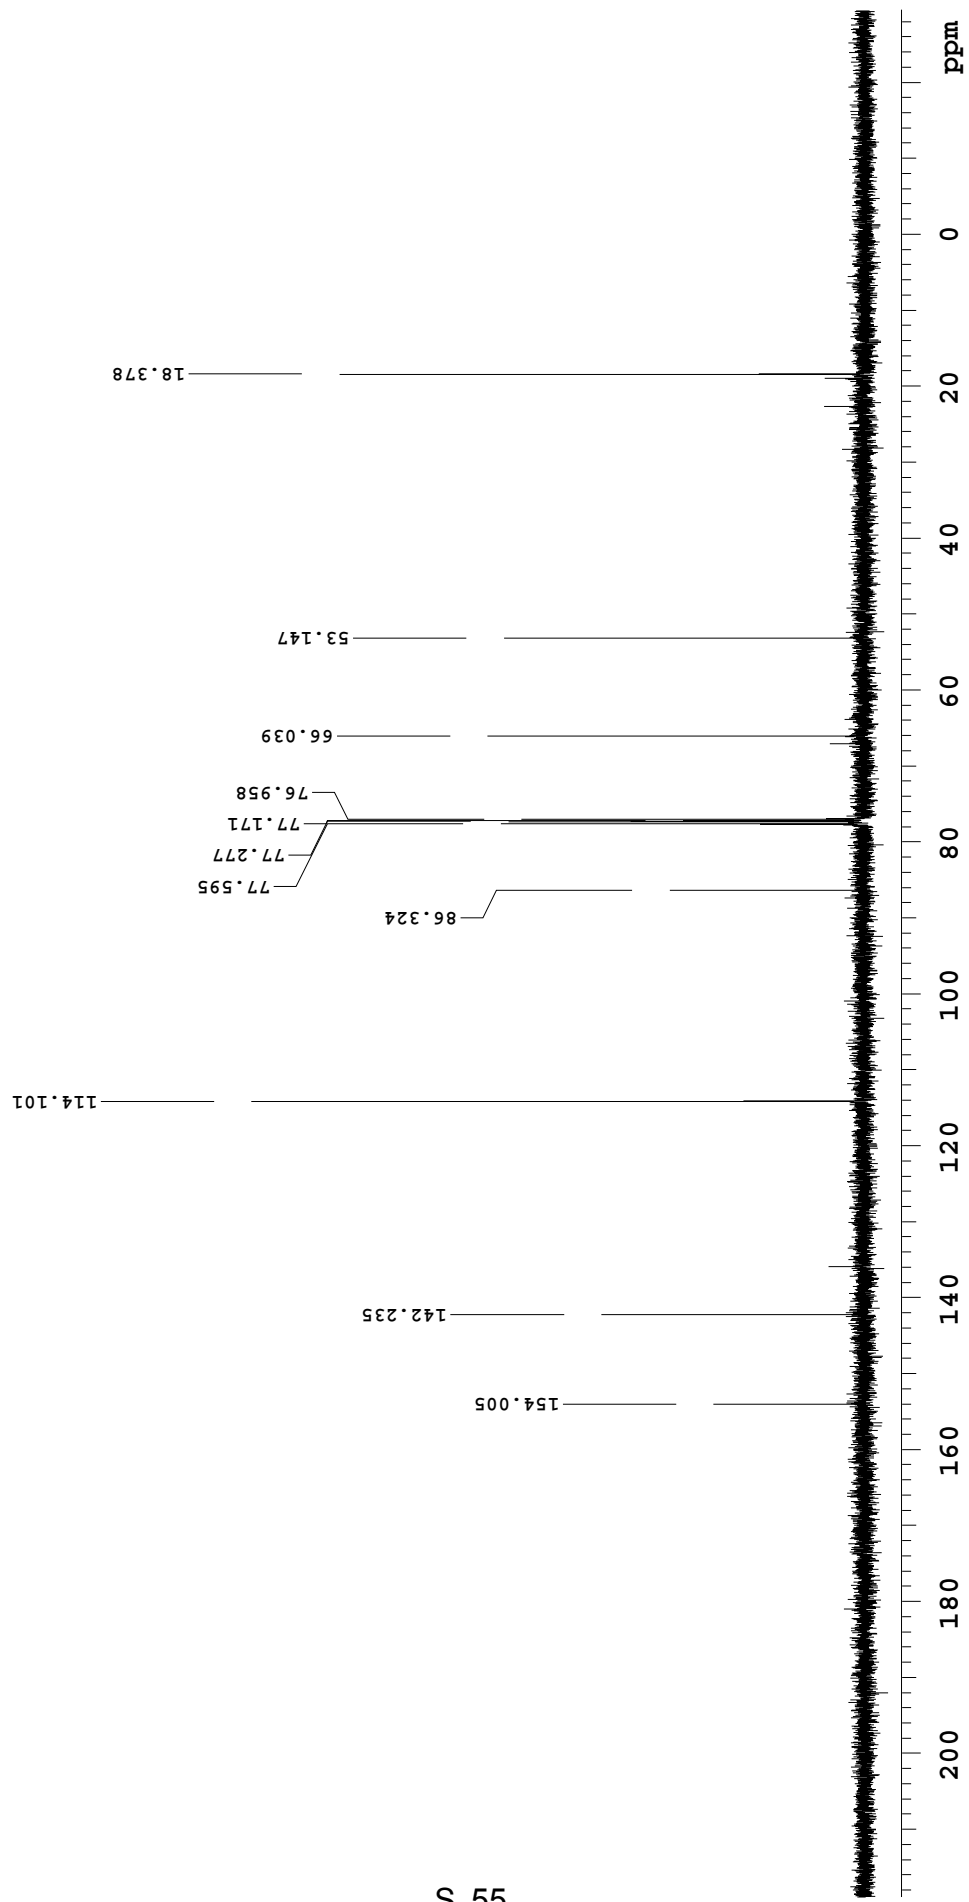

$^1\text{H}$  NMR, 400 MHz,  $\text{CDCl}_3$

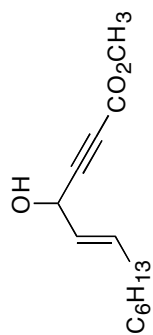

S 56

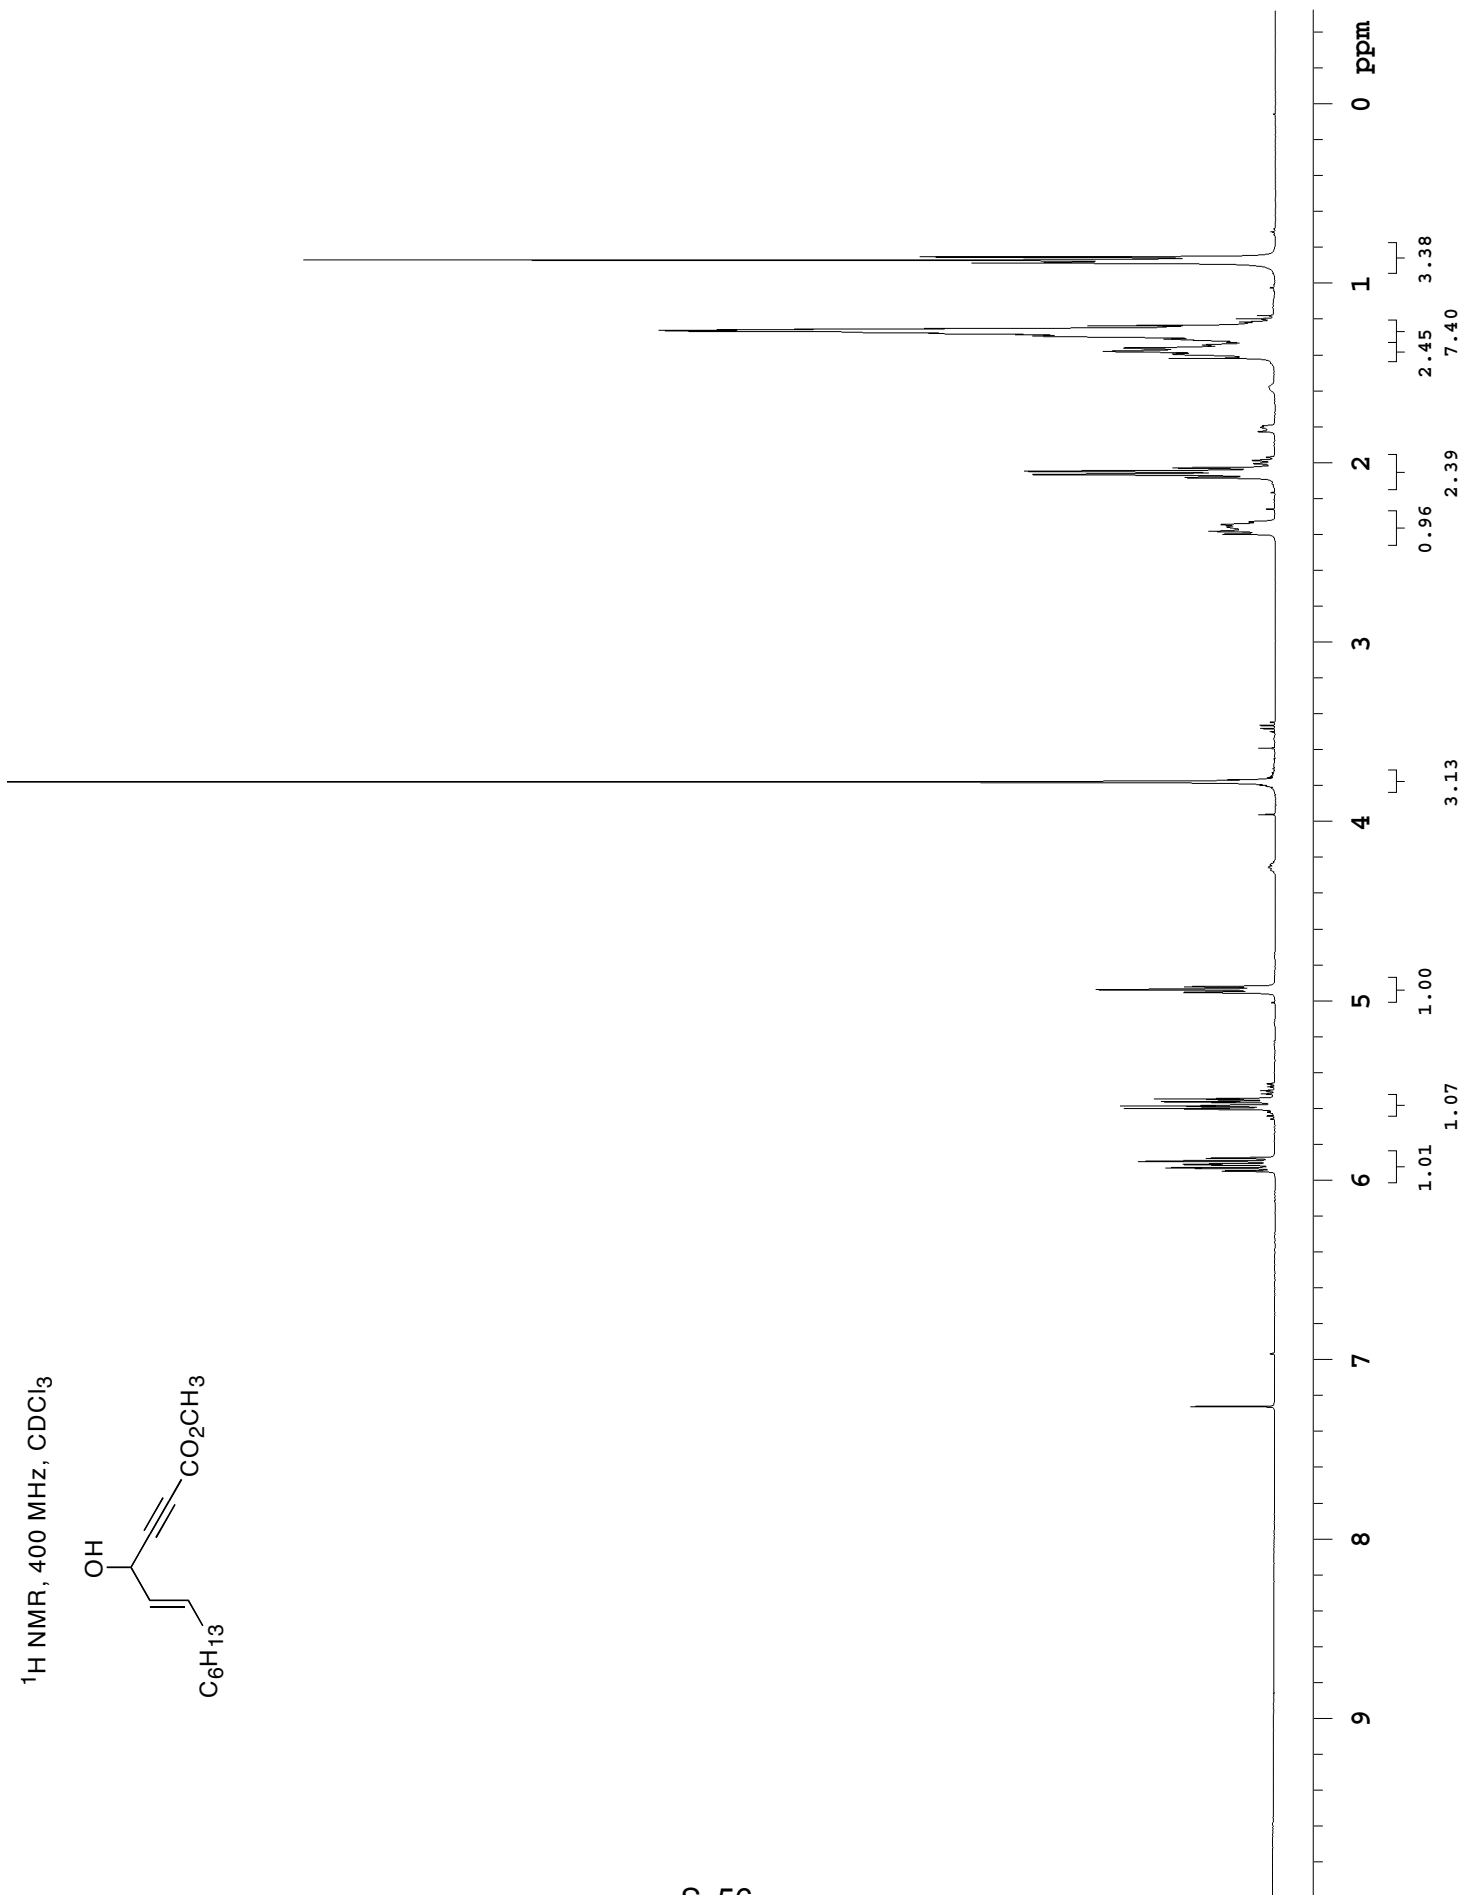



$^{13}\text{C}$  NMR. 101 MHz,  $\text{CDCl}_3$

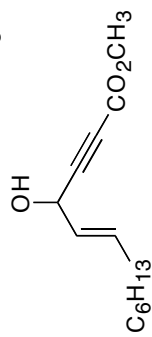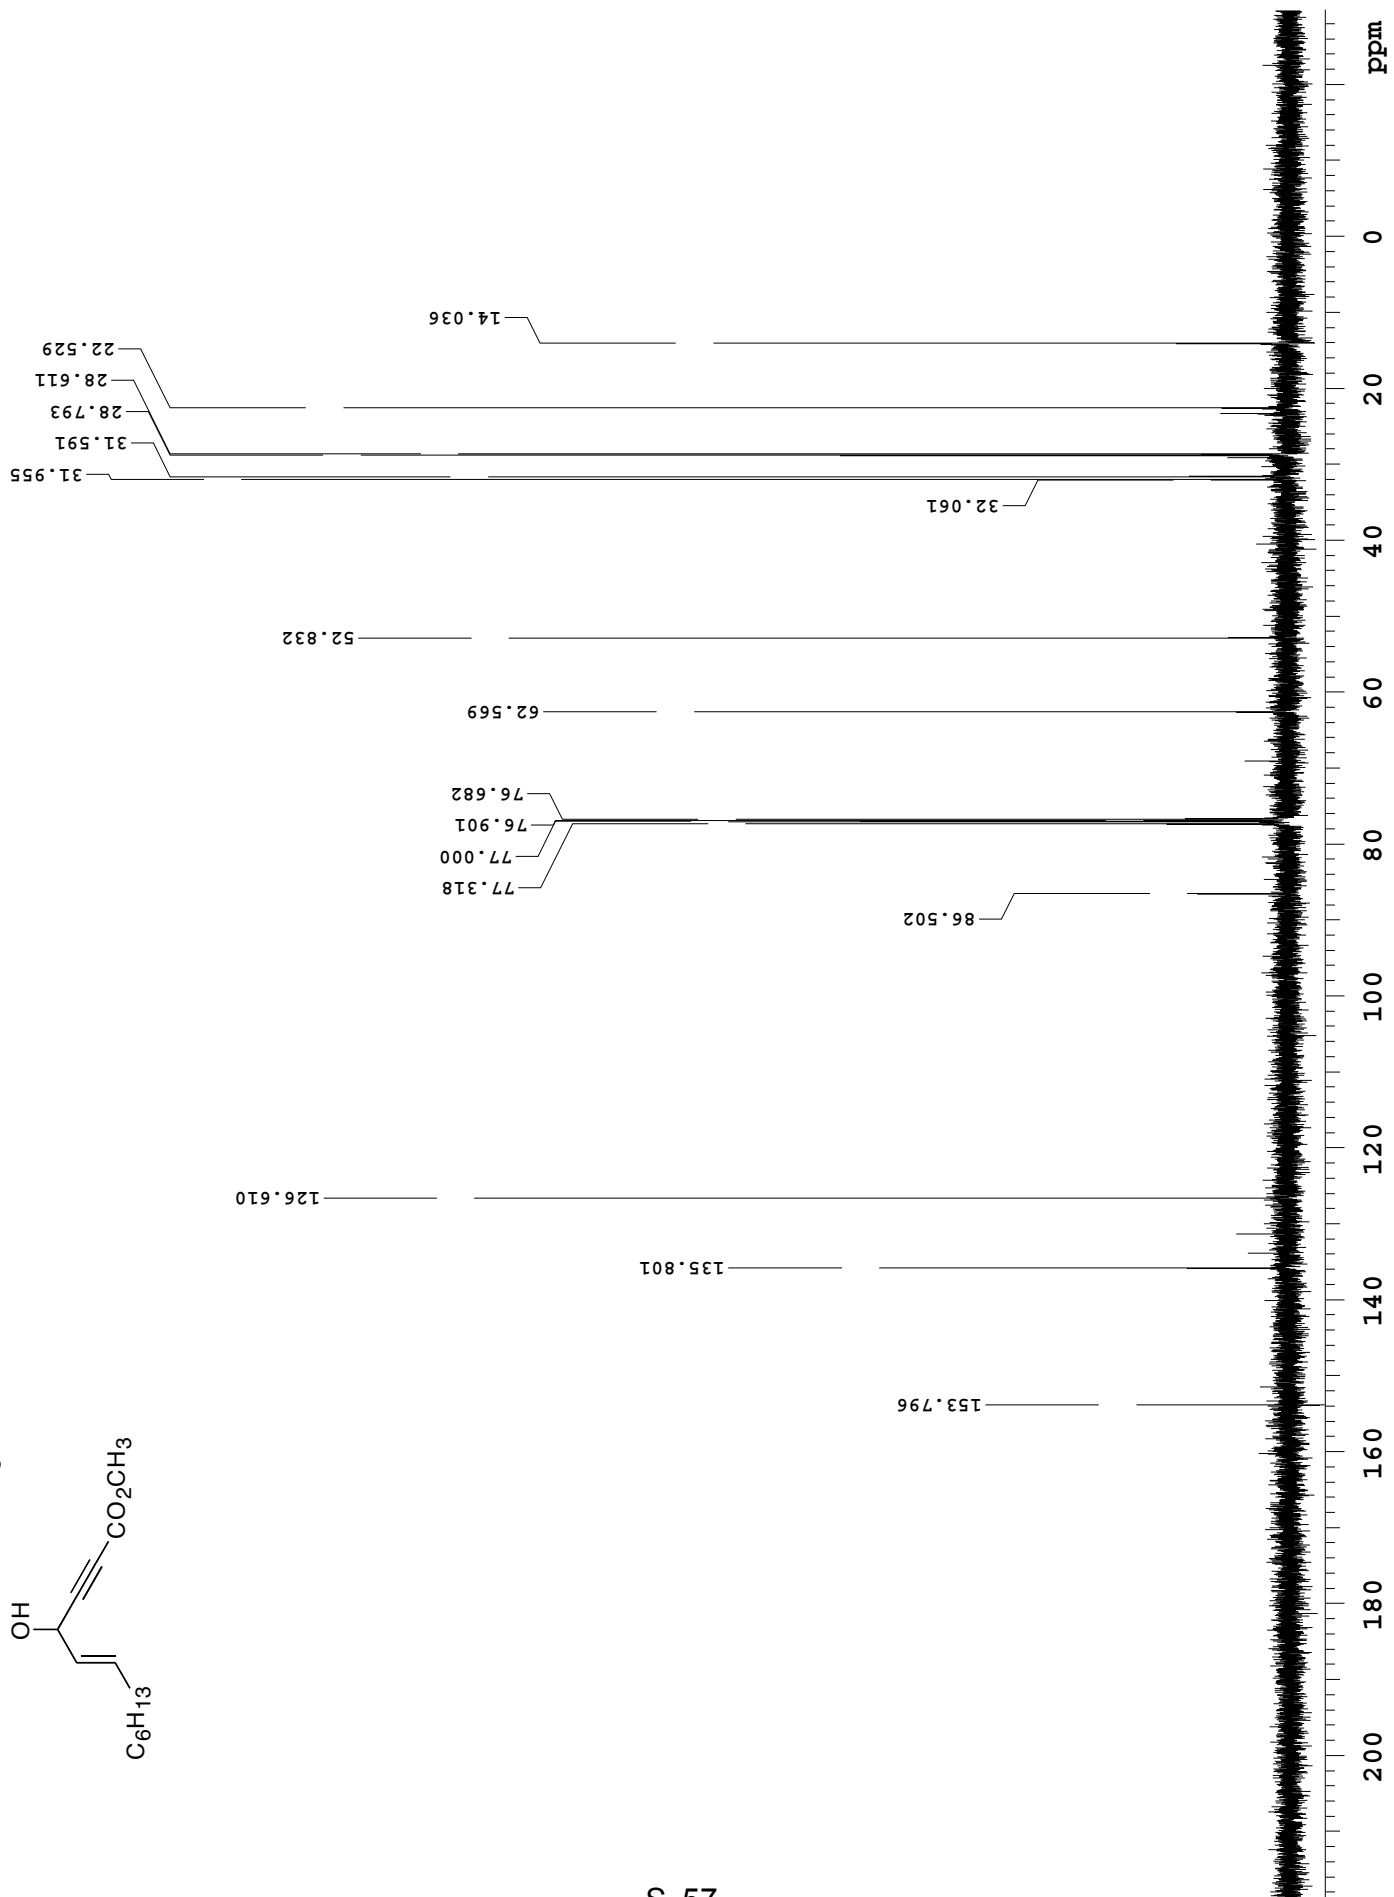

$^1\text{H}$  NMR, 400 MHz,  $\text{CDCl}_3$

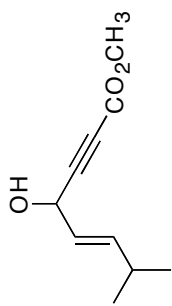

S 58

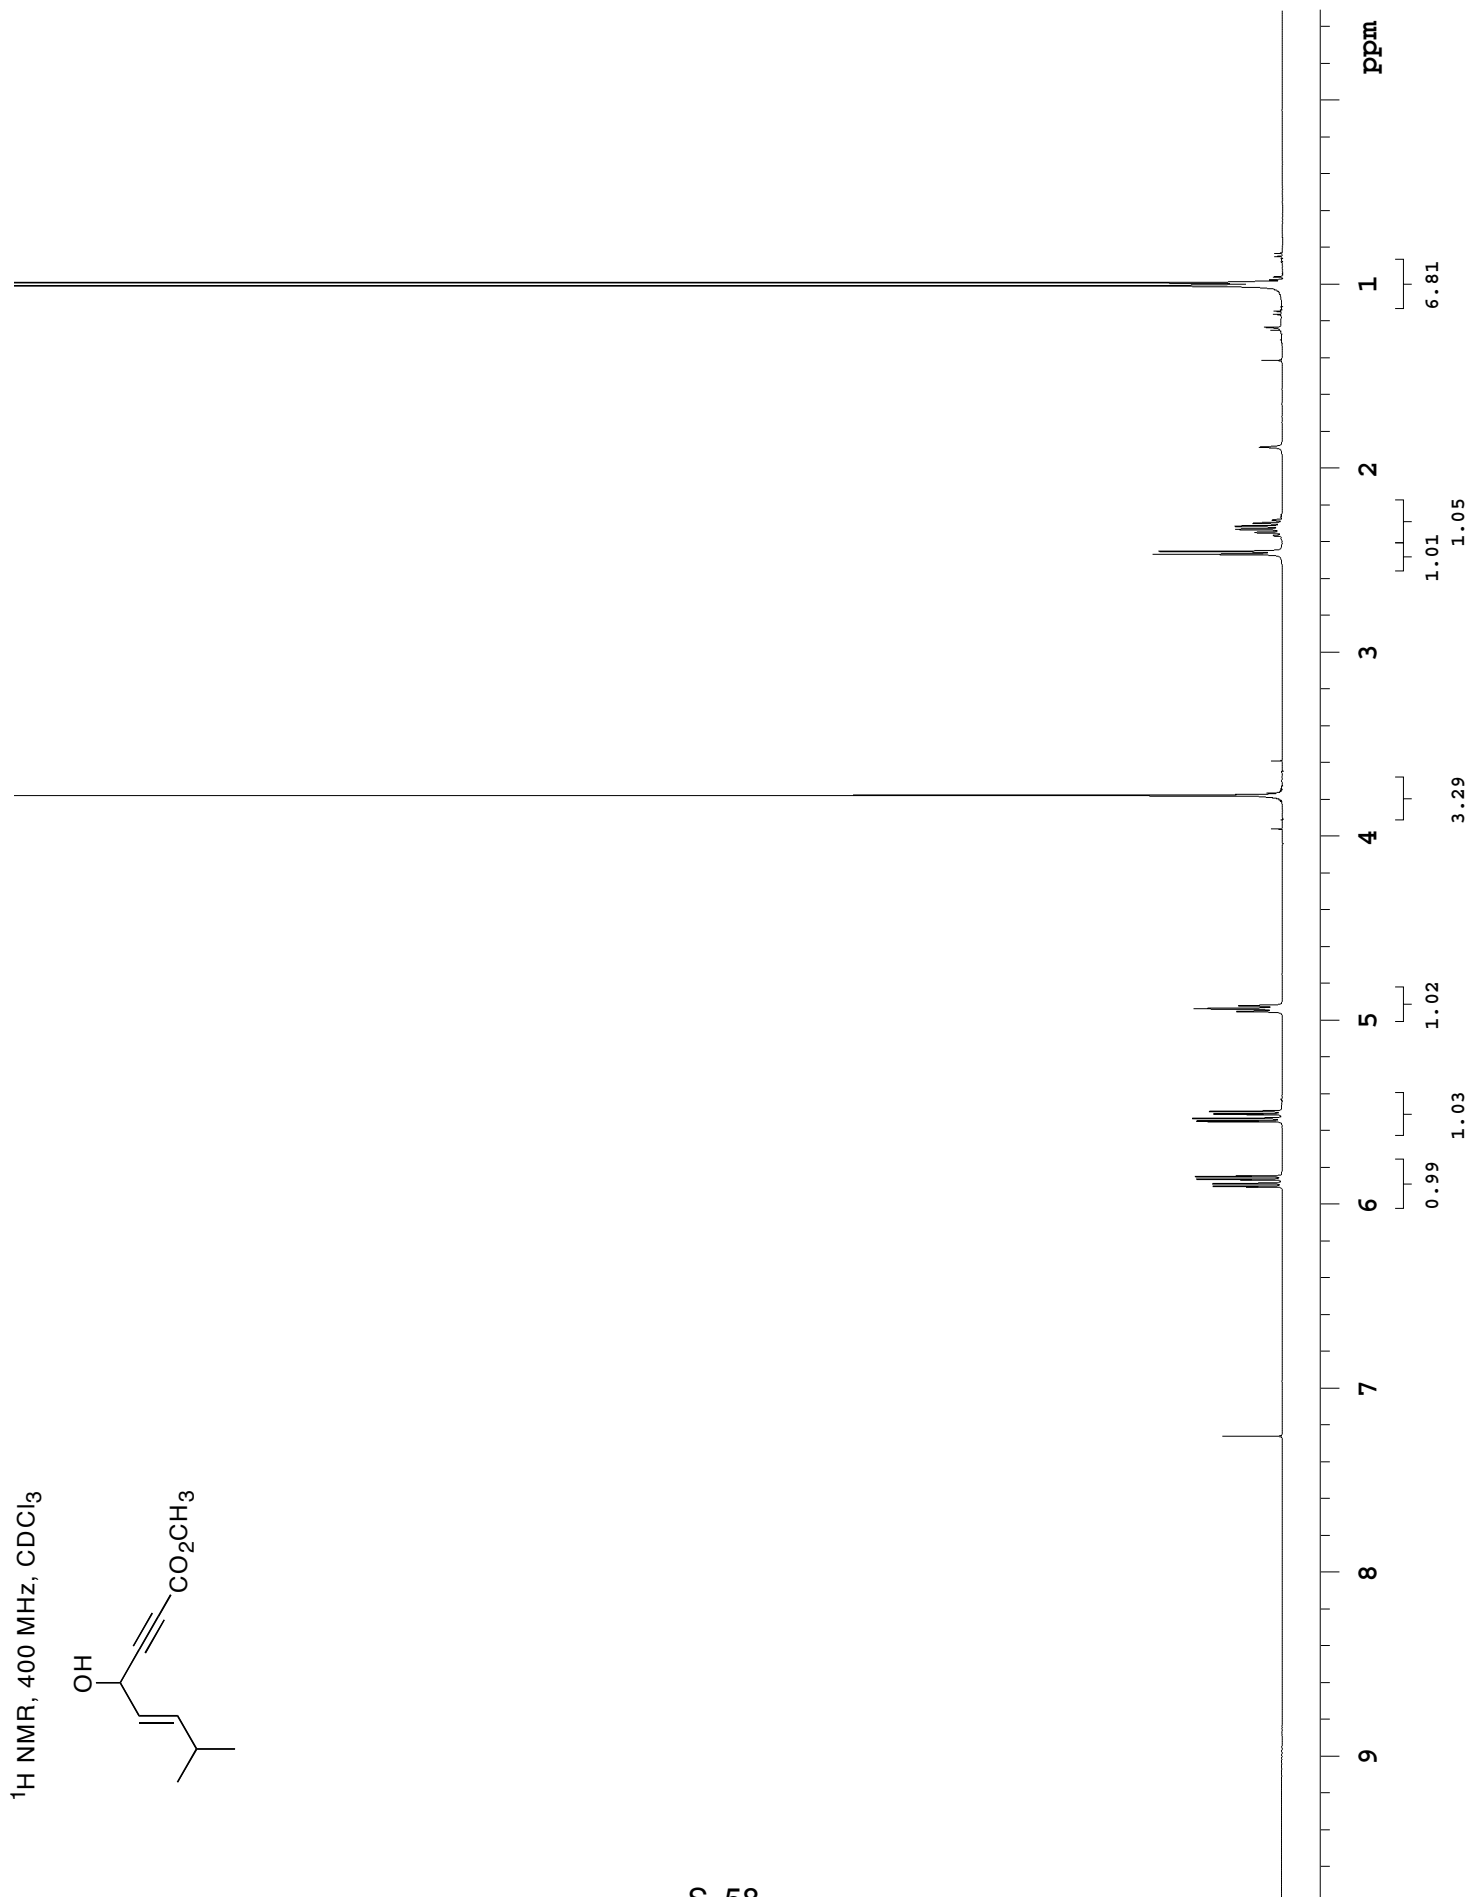

$^{13}\text{C}$  NMR. 101 MHz,  $\text{CDCl}_3$

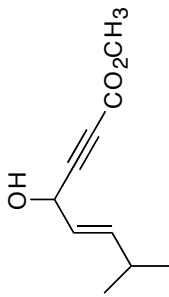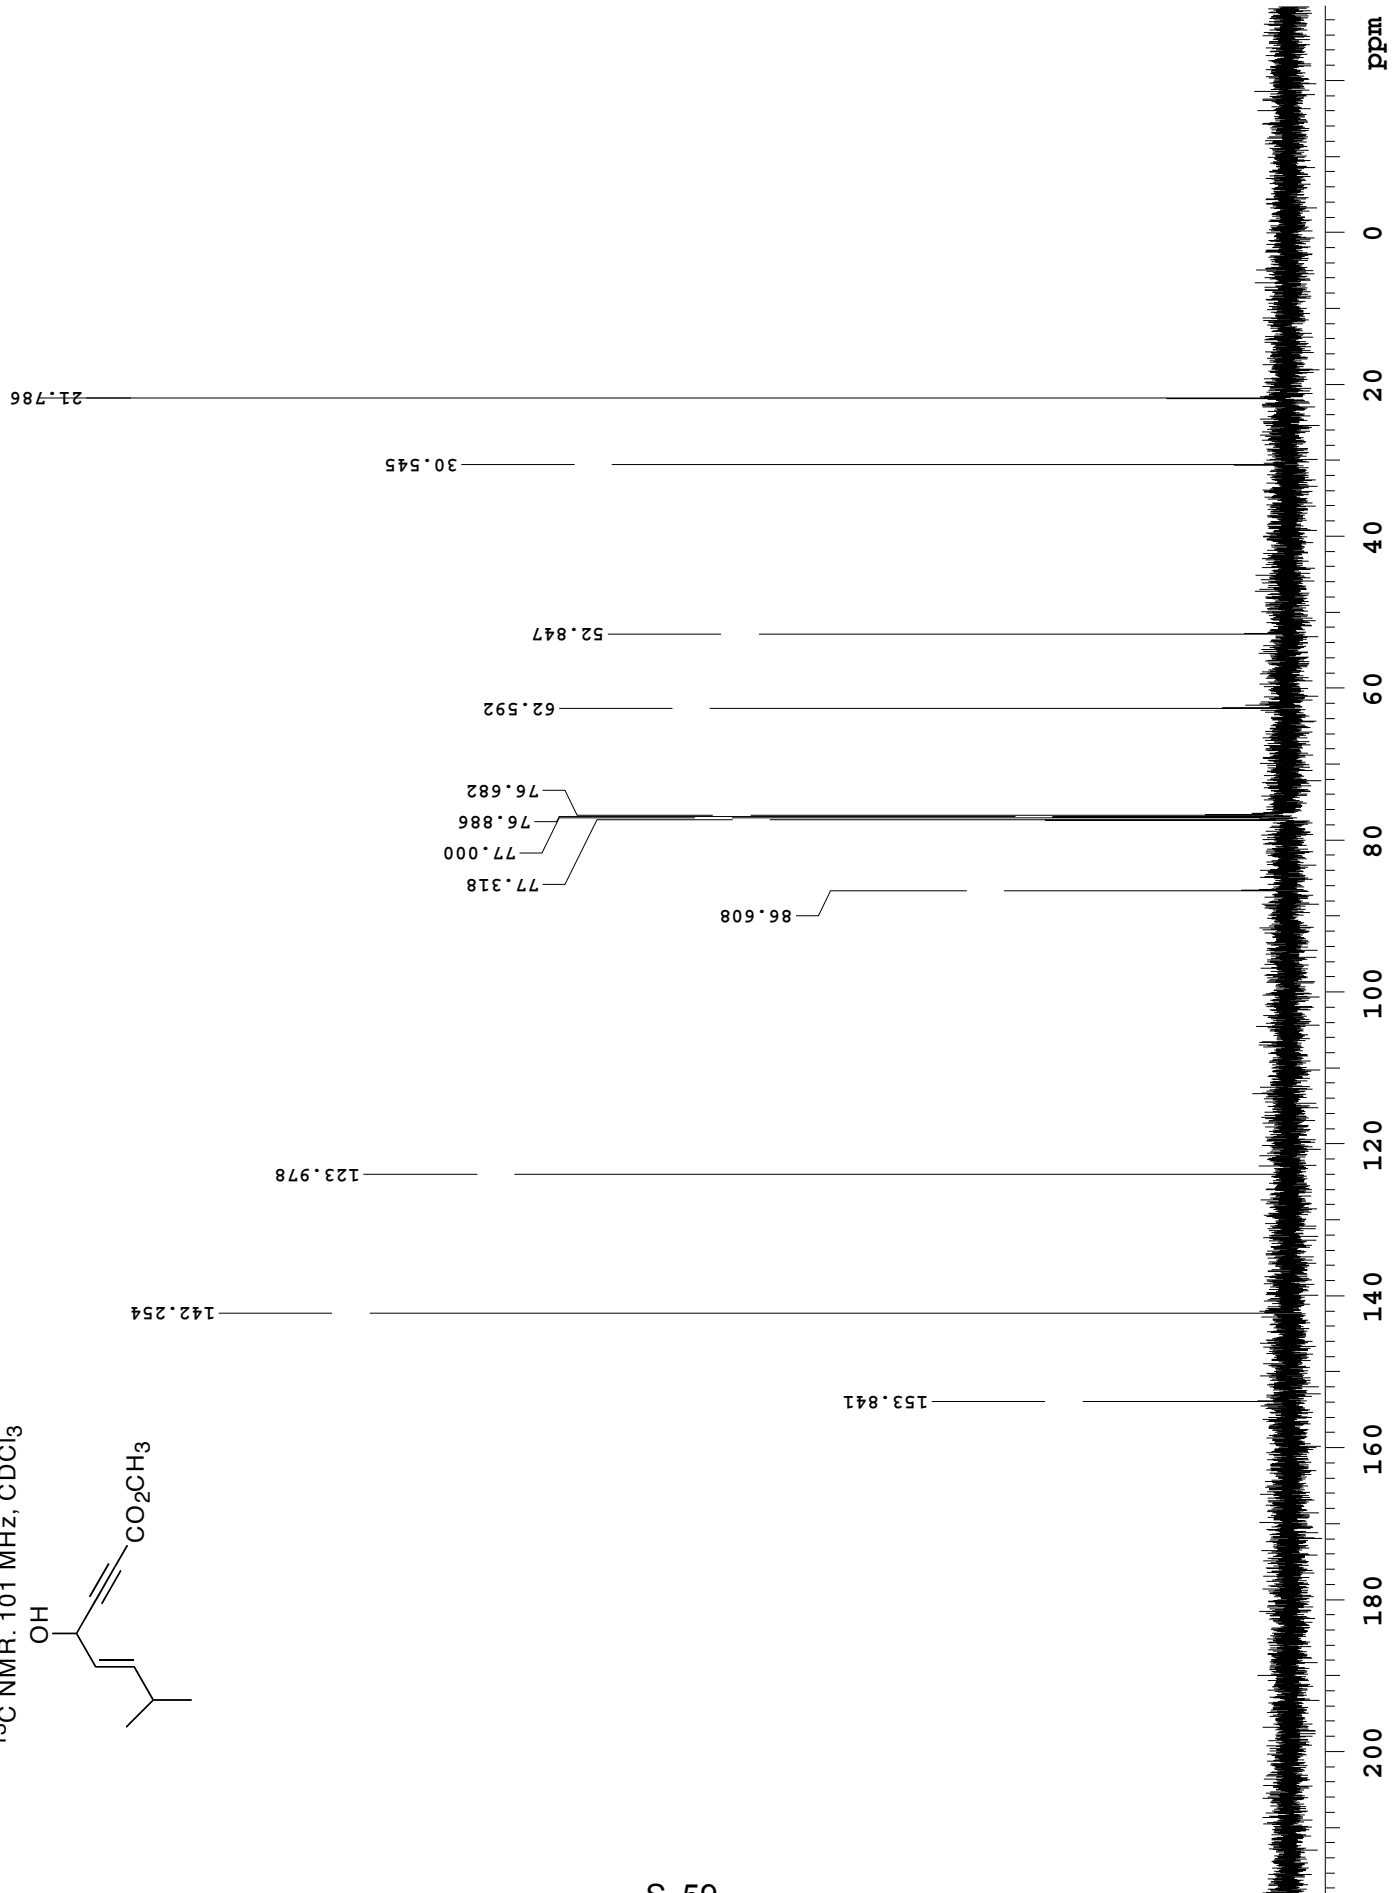

$^1\text{H}$  NMR. 400 MHz,  $\text{CDCl}_3$

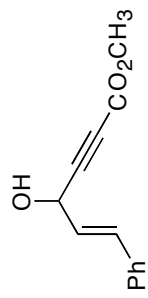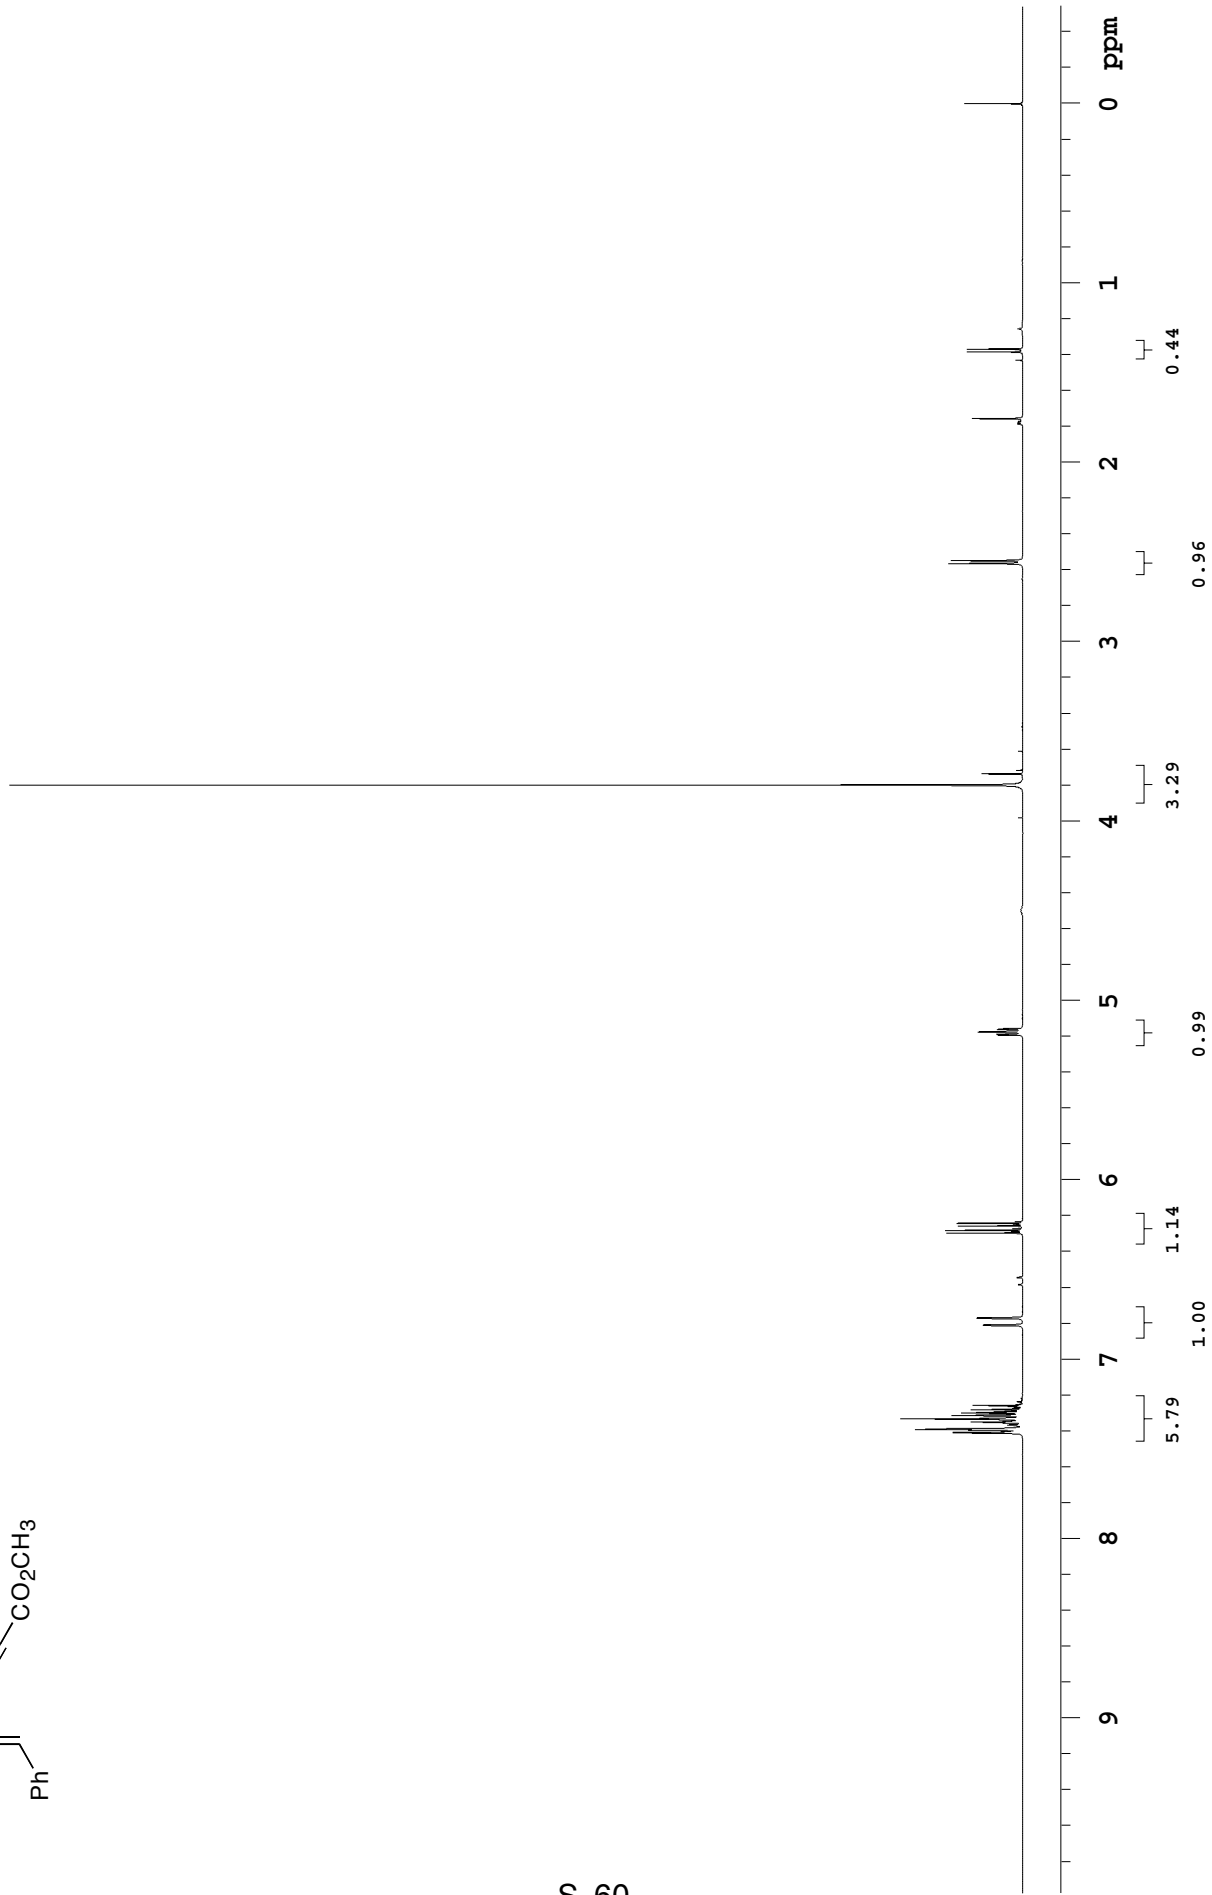

$^{13}\text{C}$  NMR, 101 MHz,  $\text{CDCl}_3$

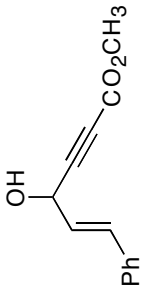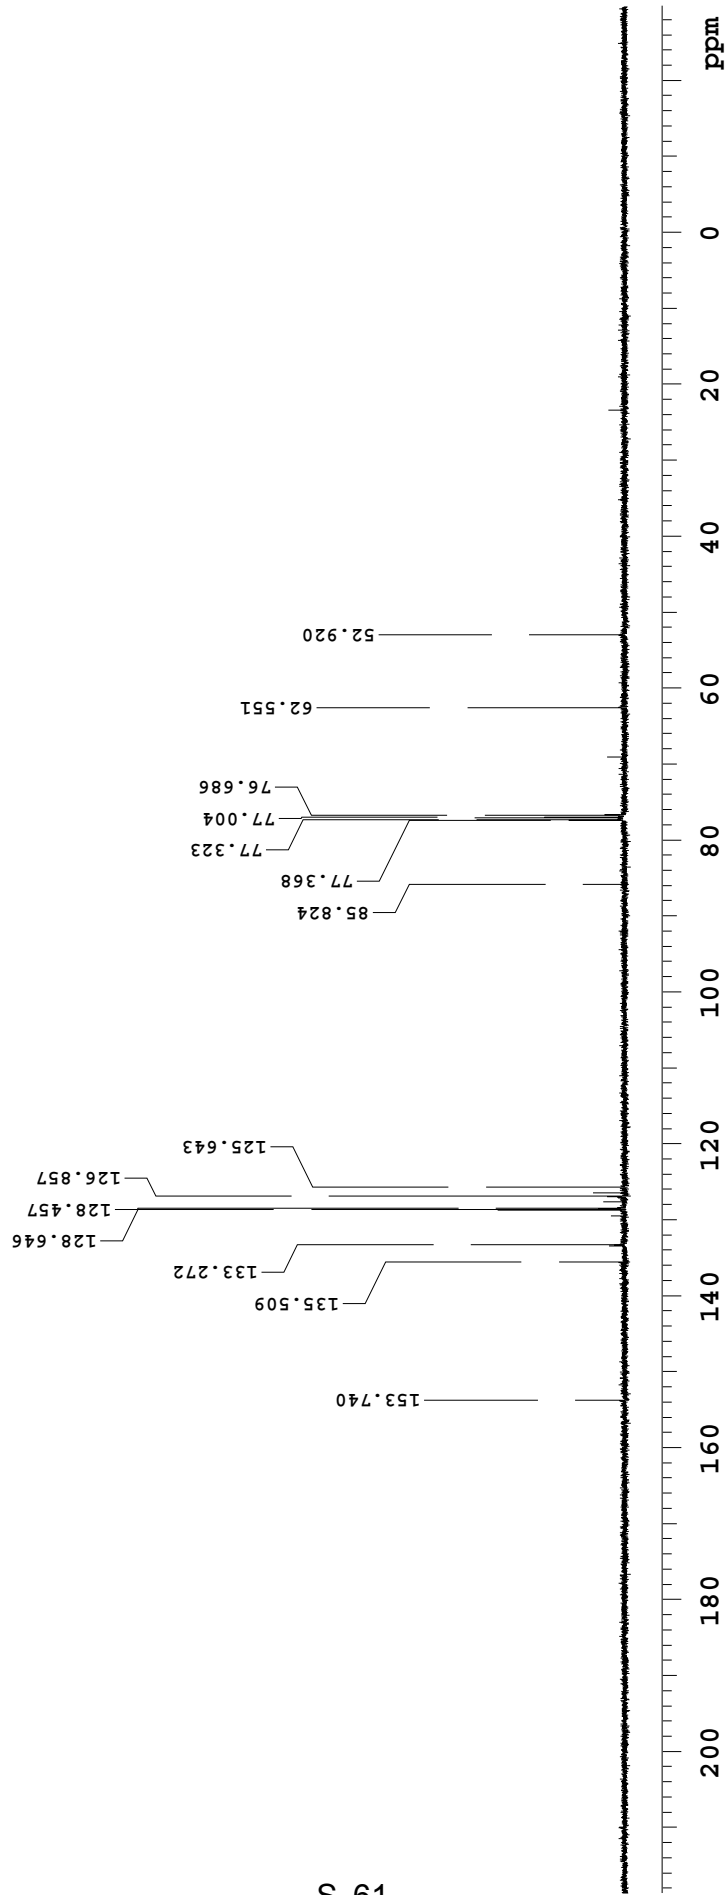

$^1\text{H}$  NMR, 400 MHz,  $\text{CDCl}_3$

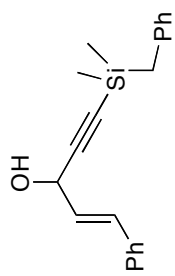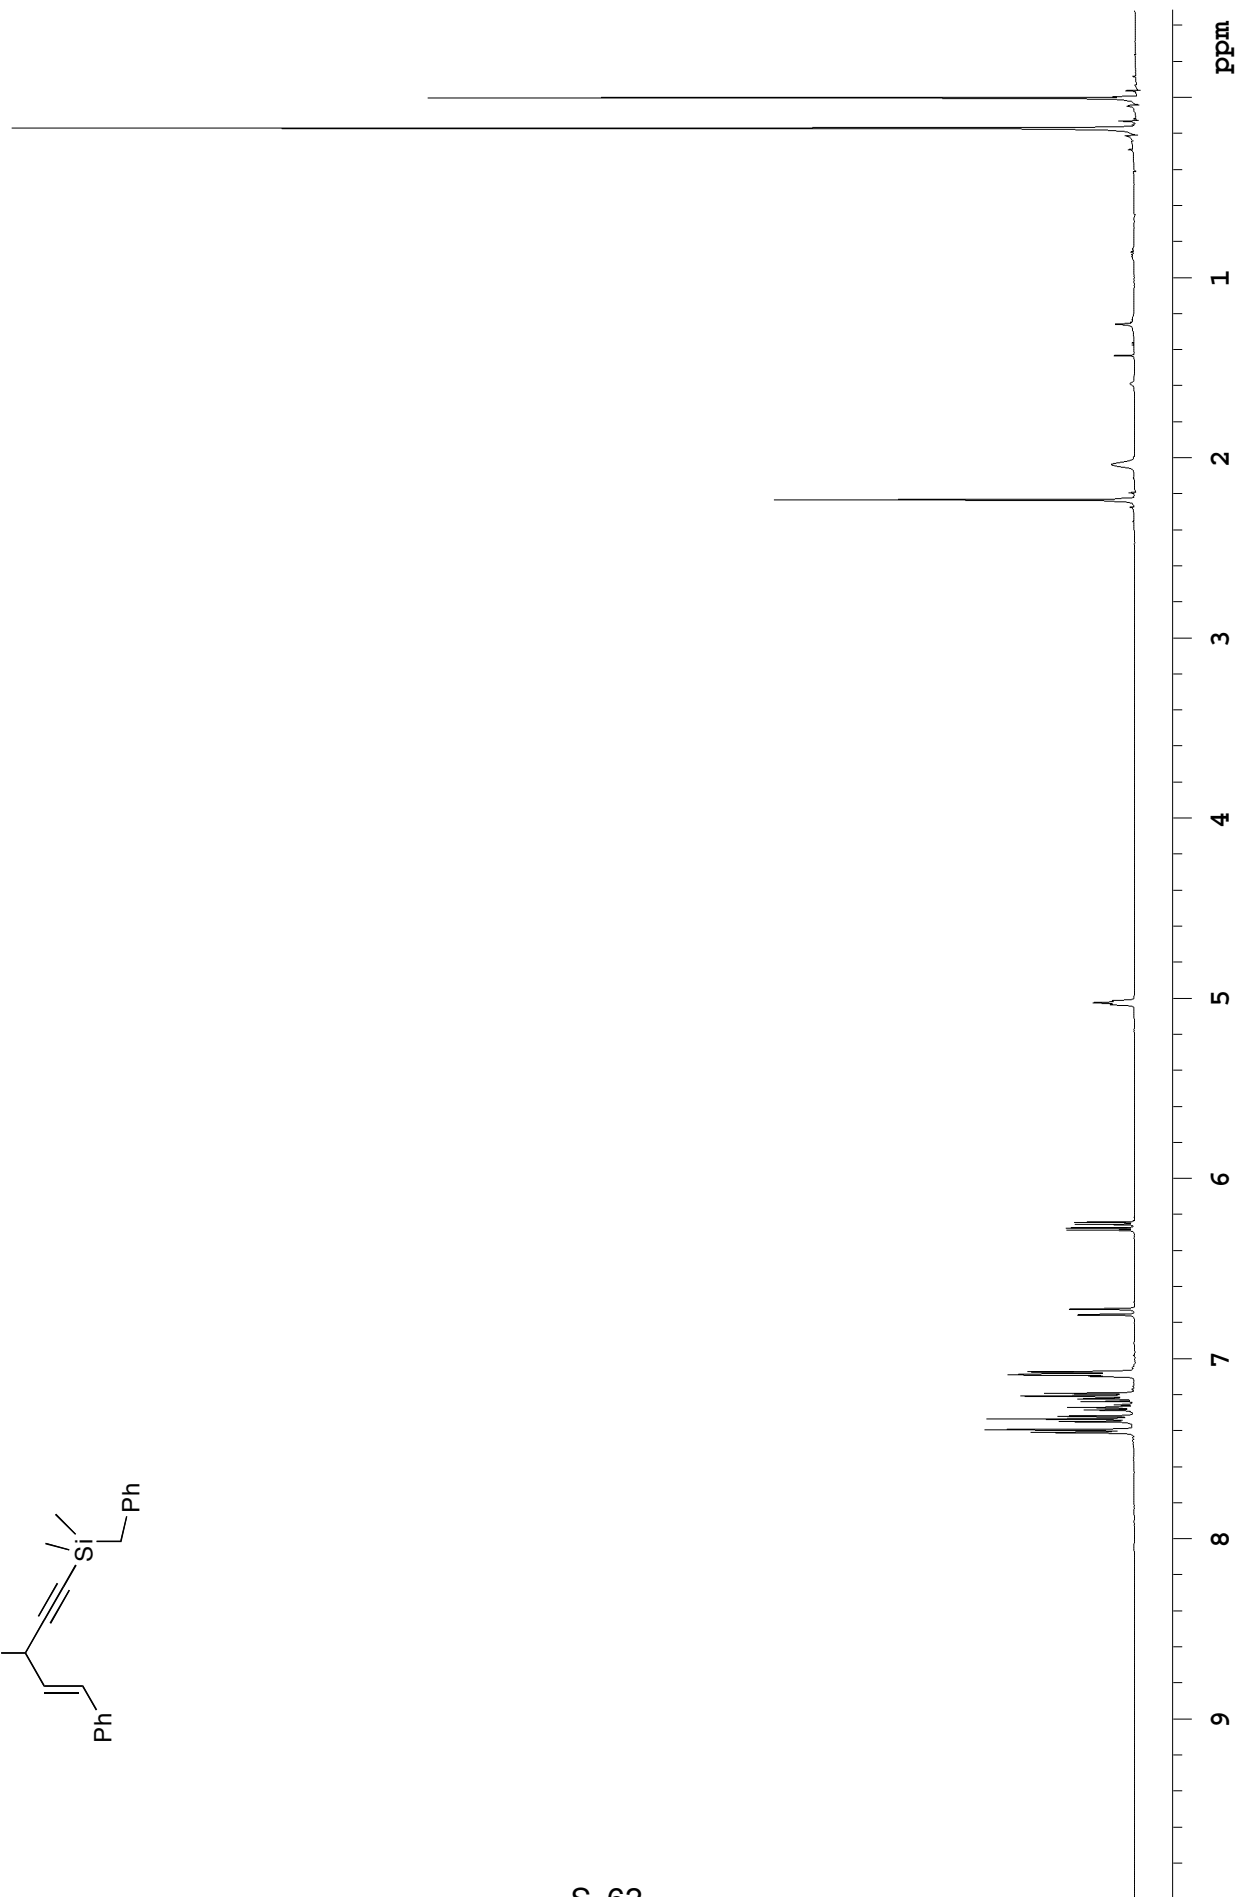

<sup>13</sup>C NMR. 126 MHz, CDCl<sub>3</sub>

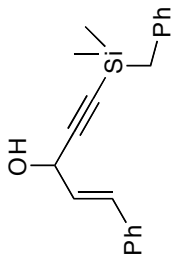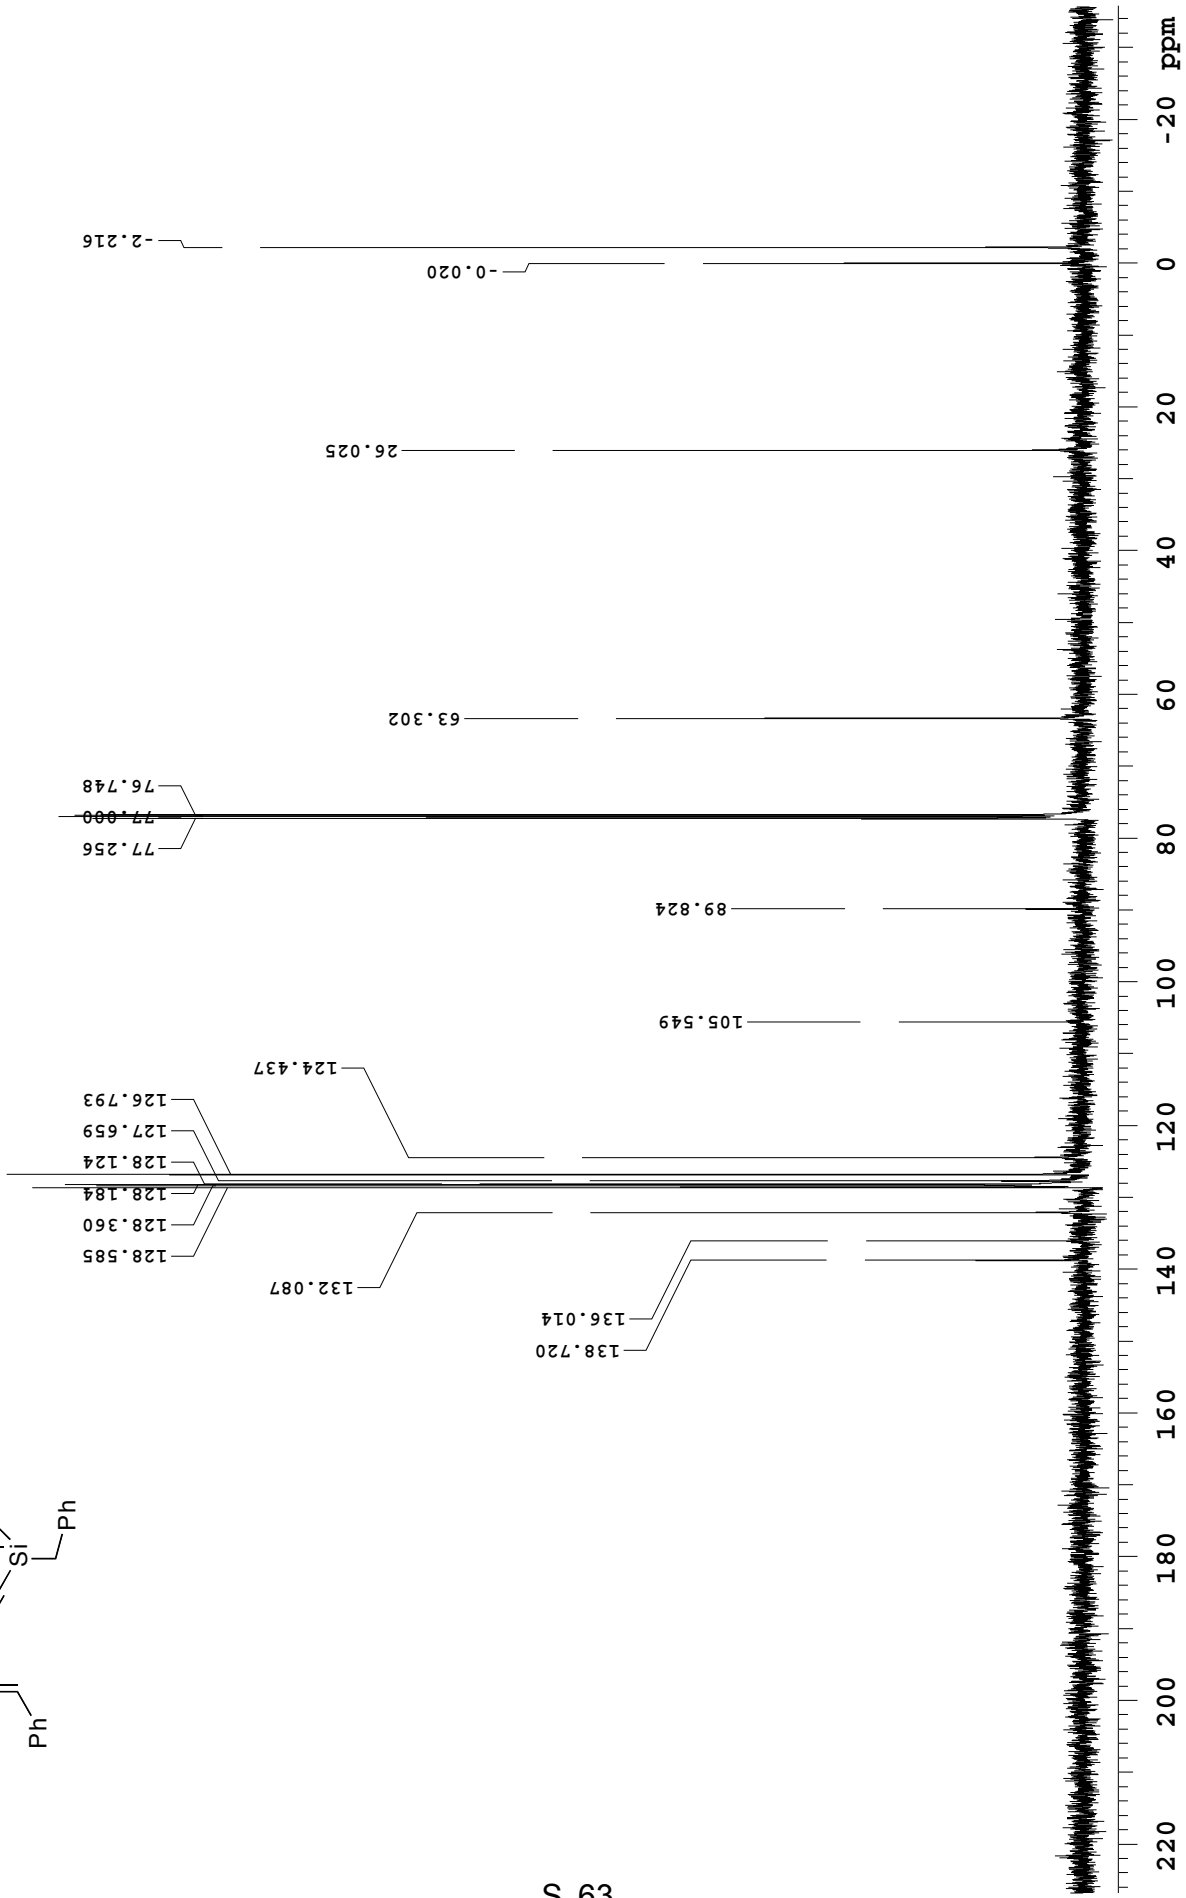

$^1\text{H}$  NMR, 500 MHz,  $\text{CDCl}_3$

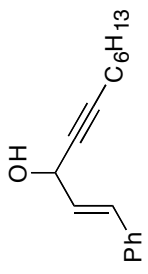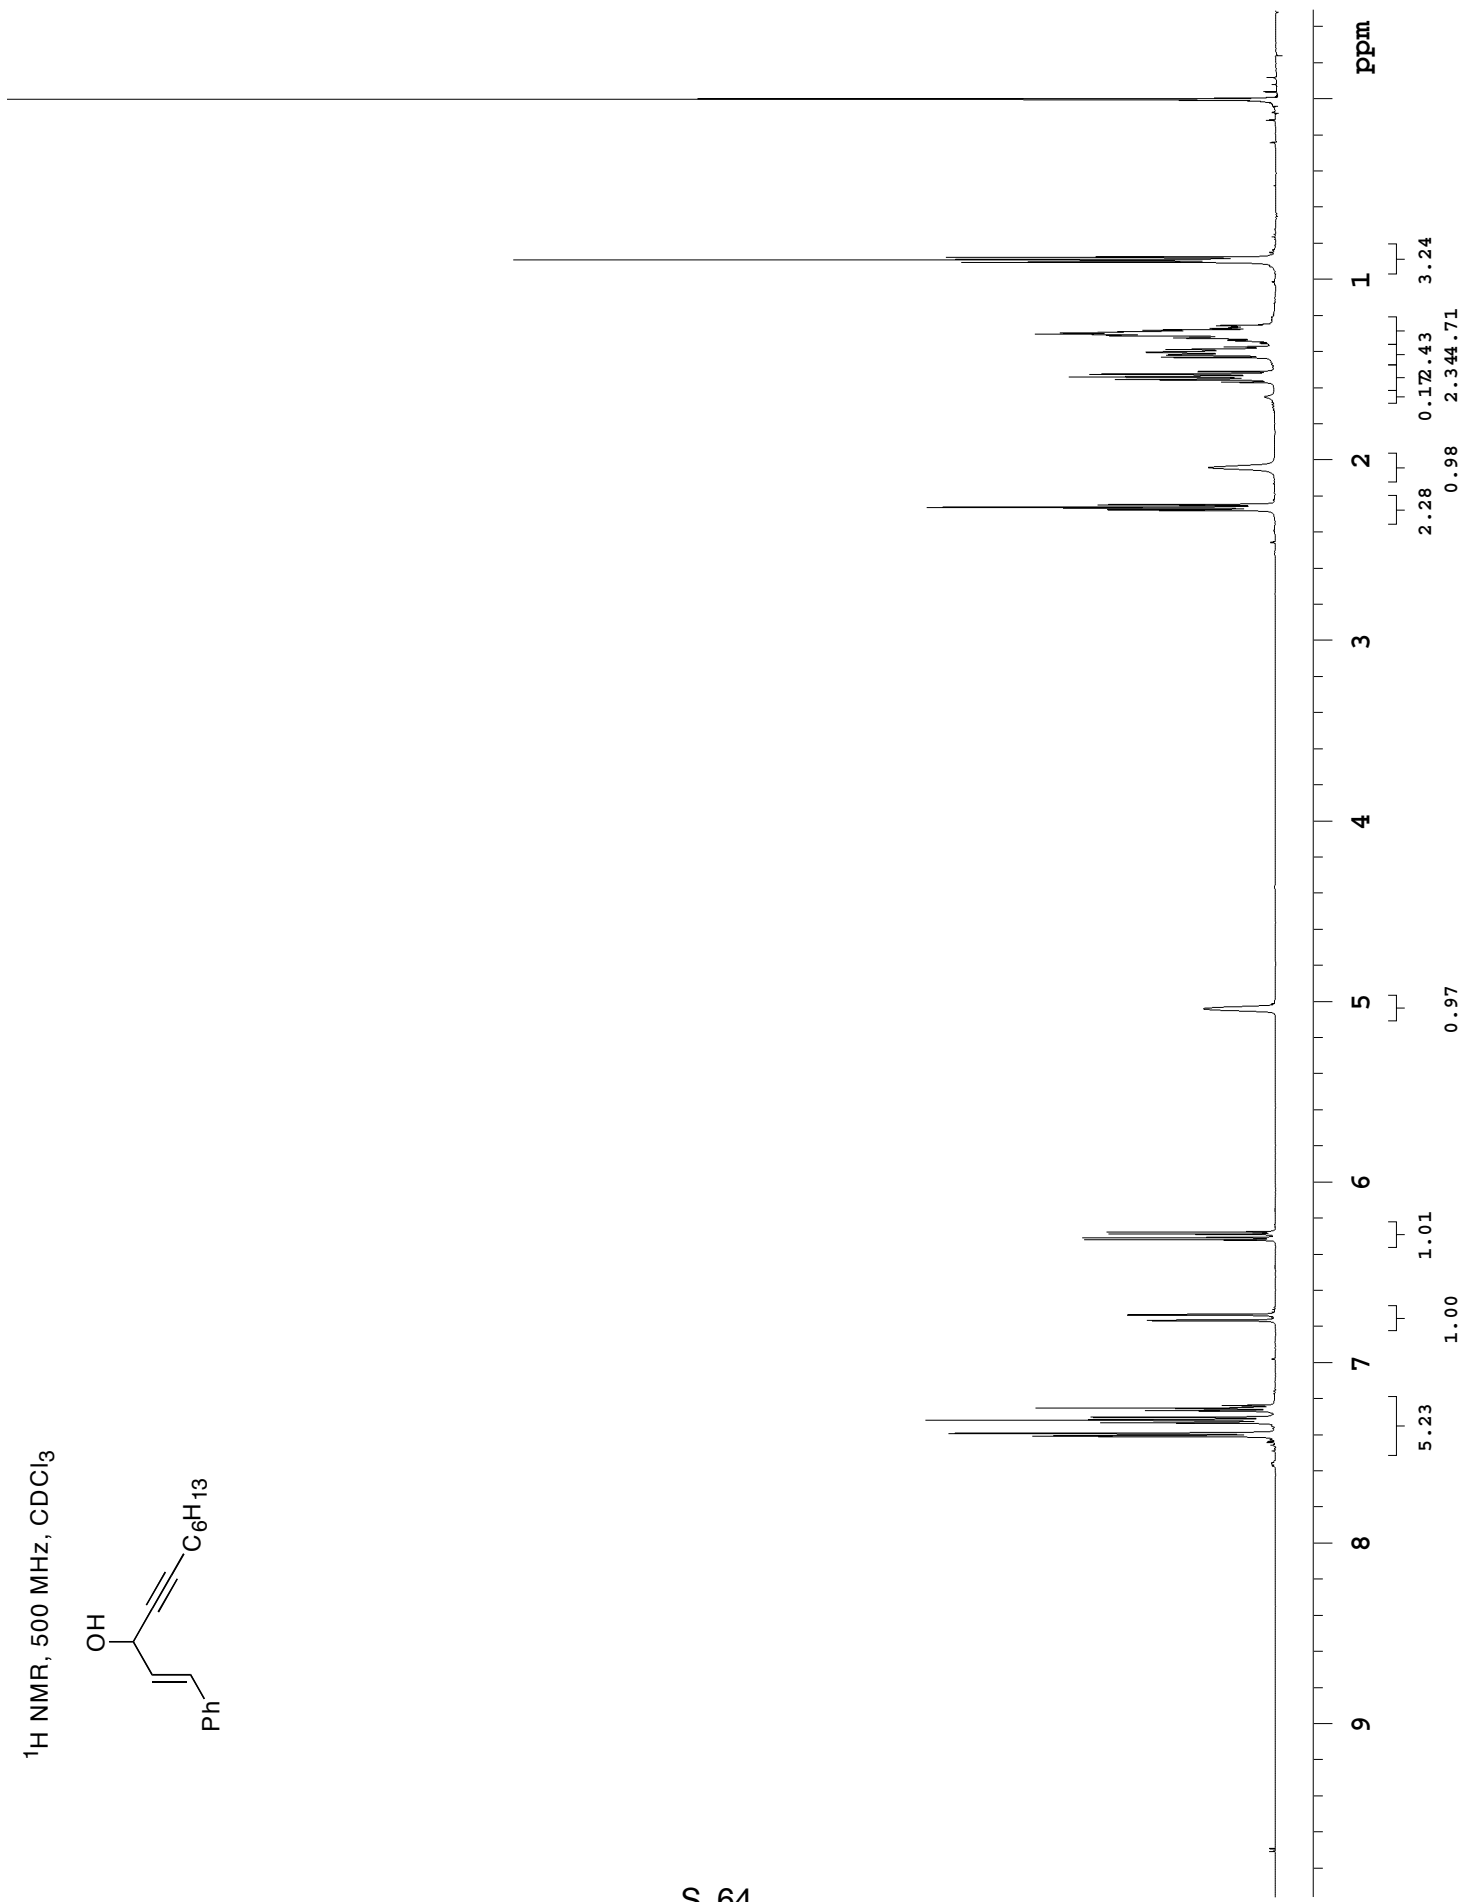



$^{13}\text{C}$  NMR, 126 MHz,  $\text{CDCl}_3$

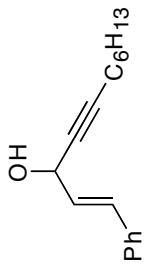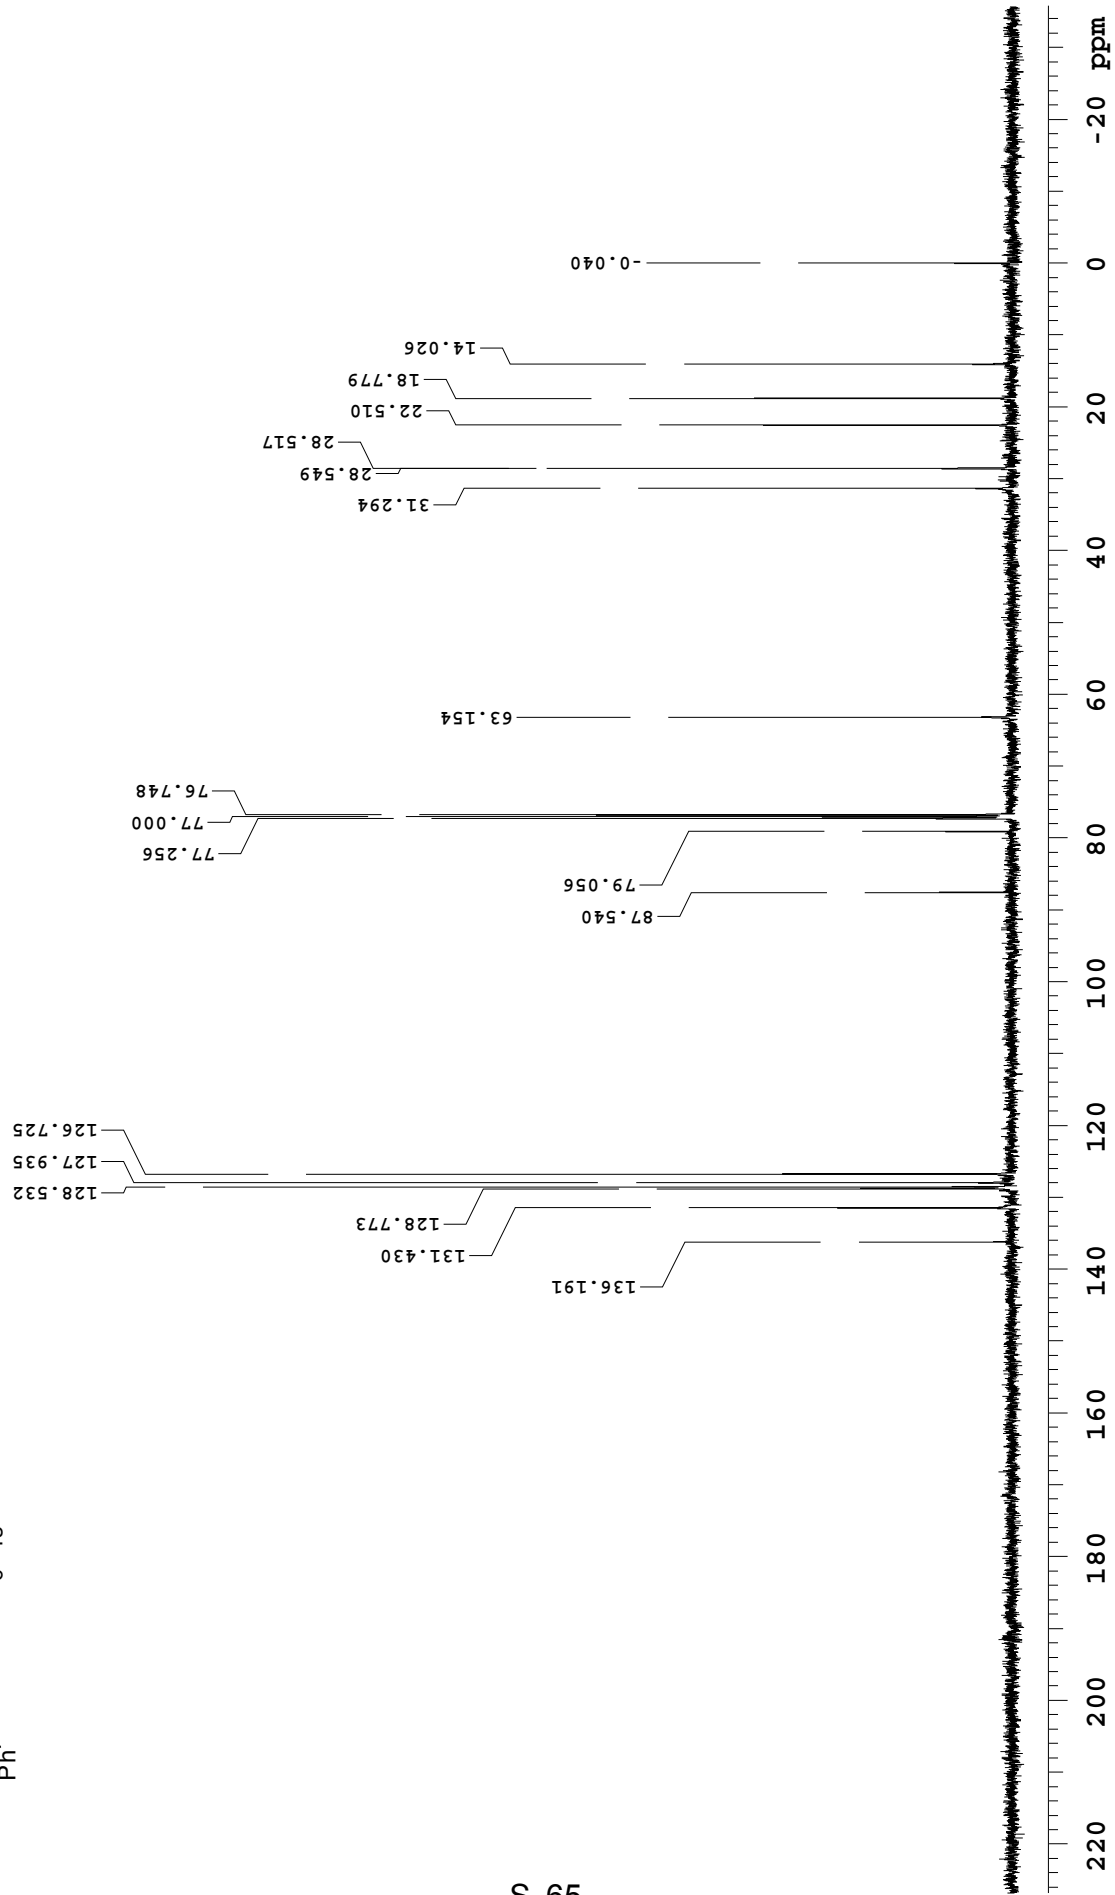

$^1\text{H}$  NMR, 400 MHz,  $\text{CDCl}_3$

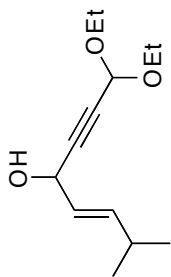

S 66

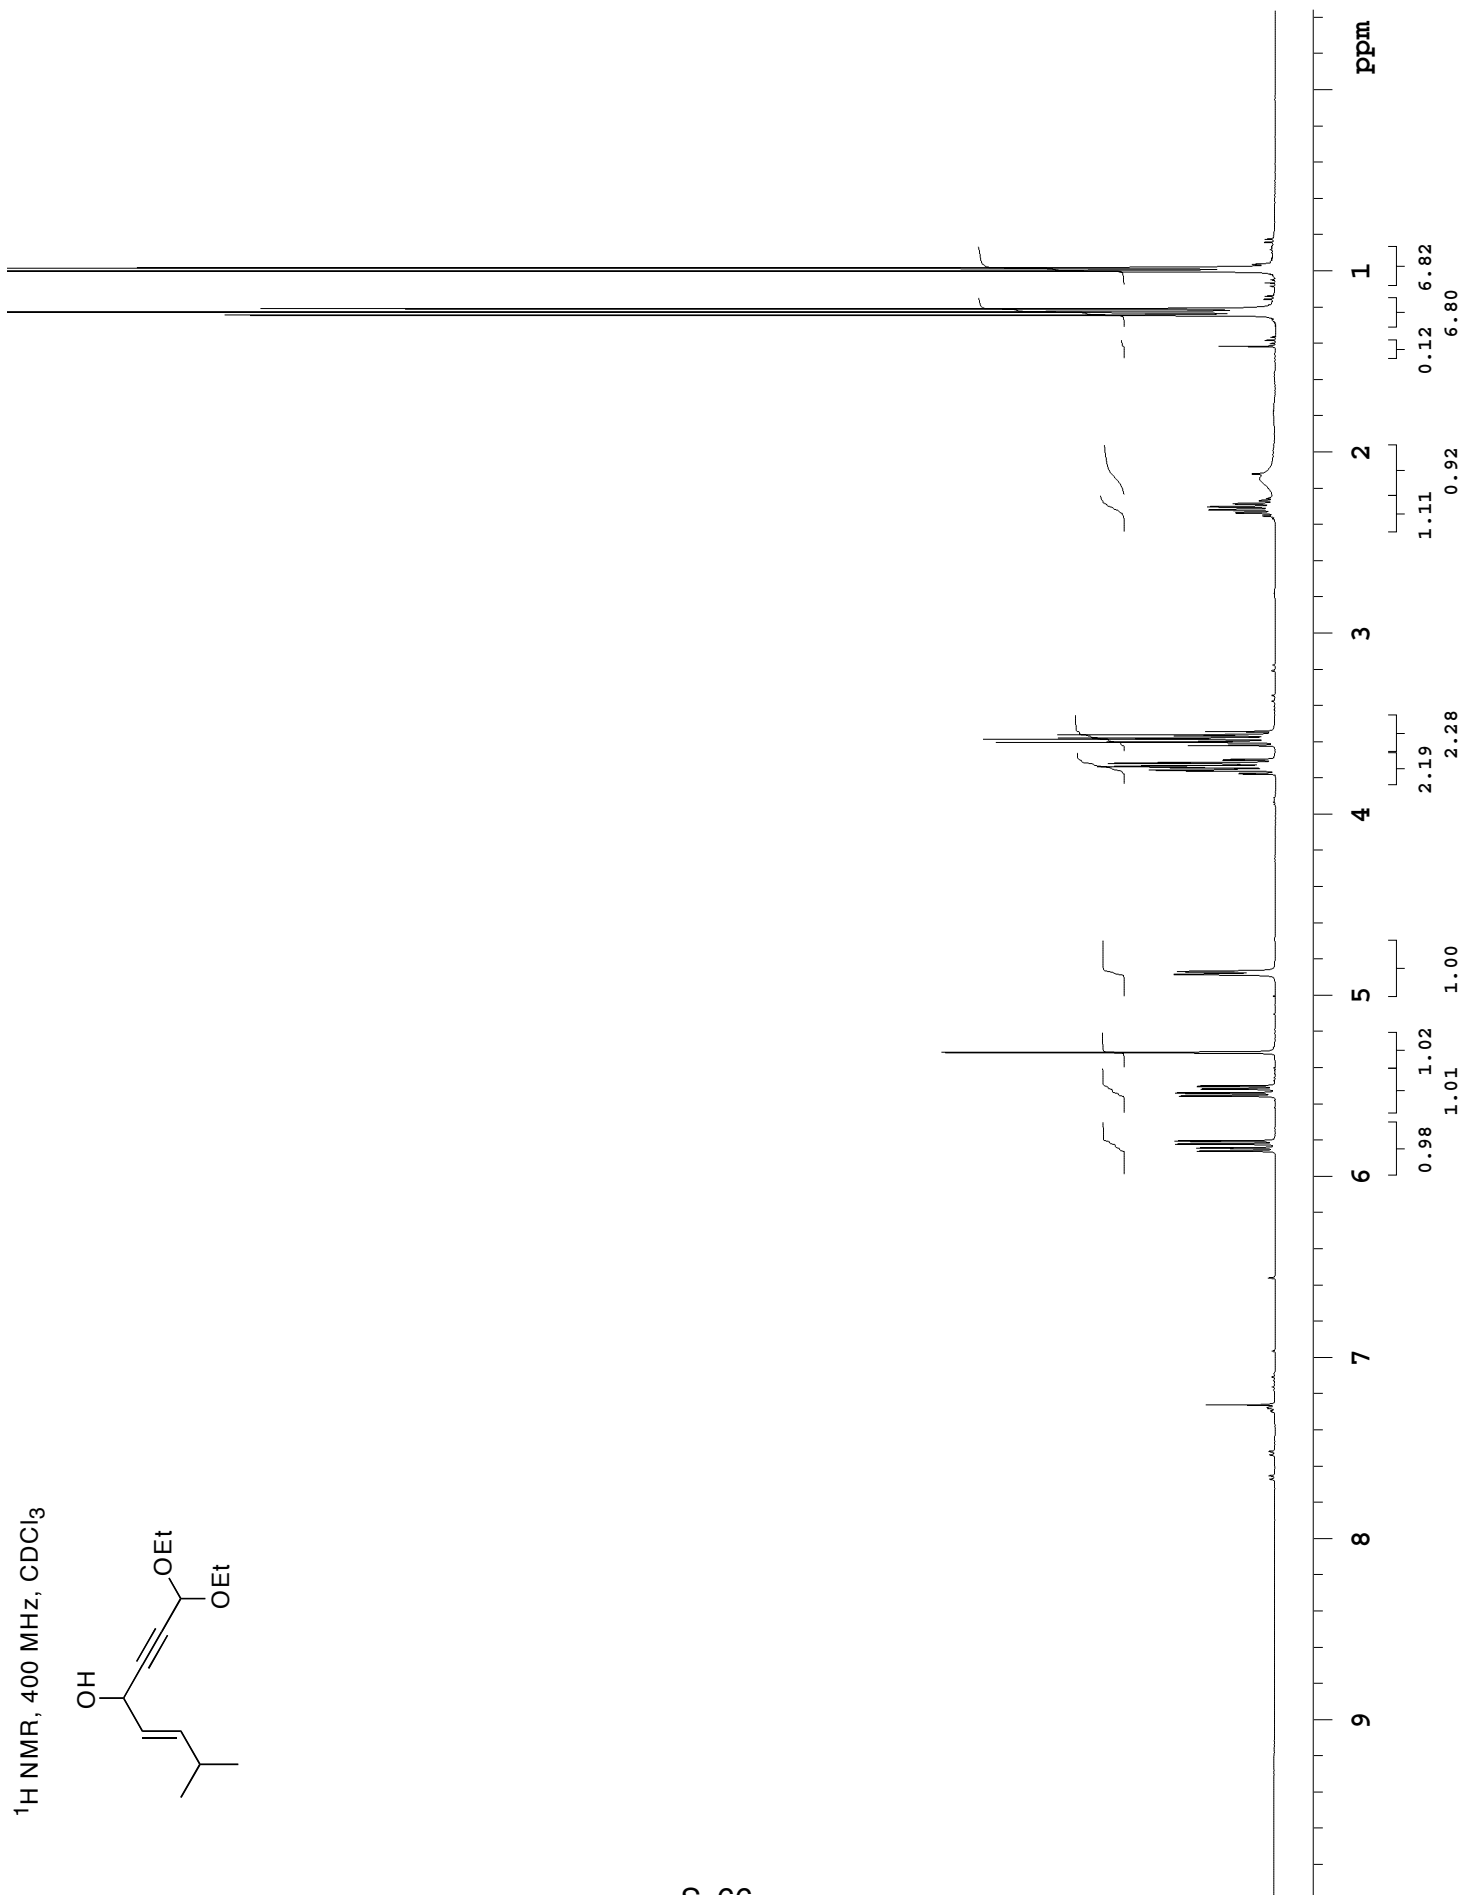

<sup>13</sup>C NMR, 101 MHz, CDCl<sub>3</sub>

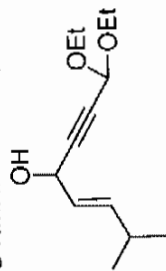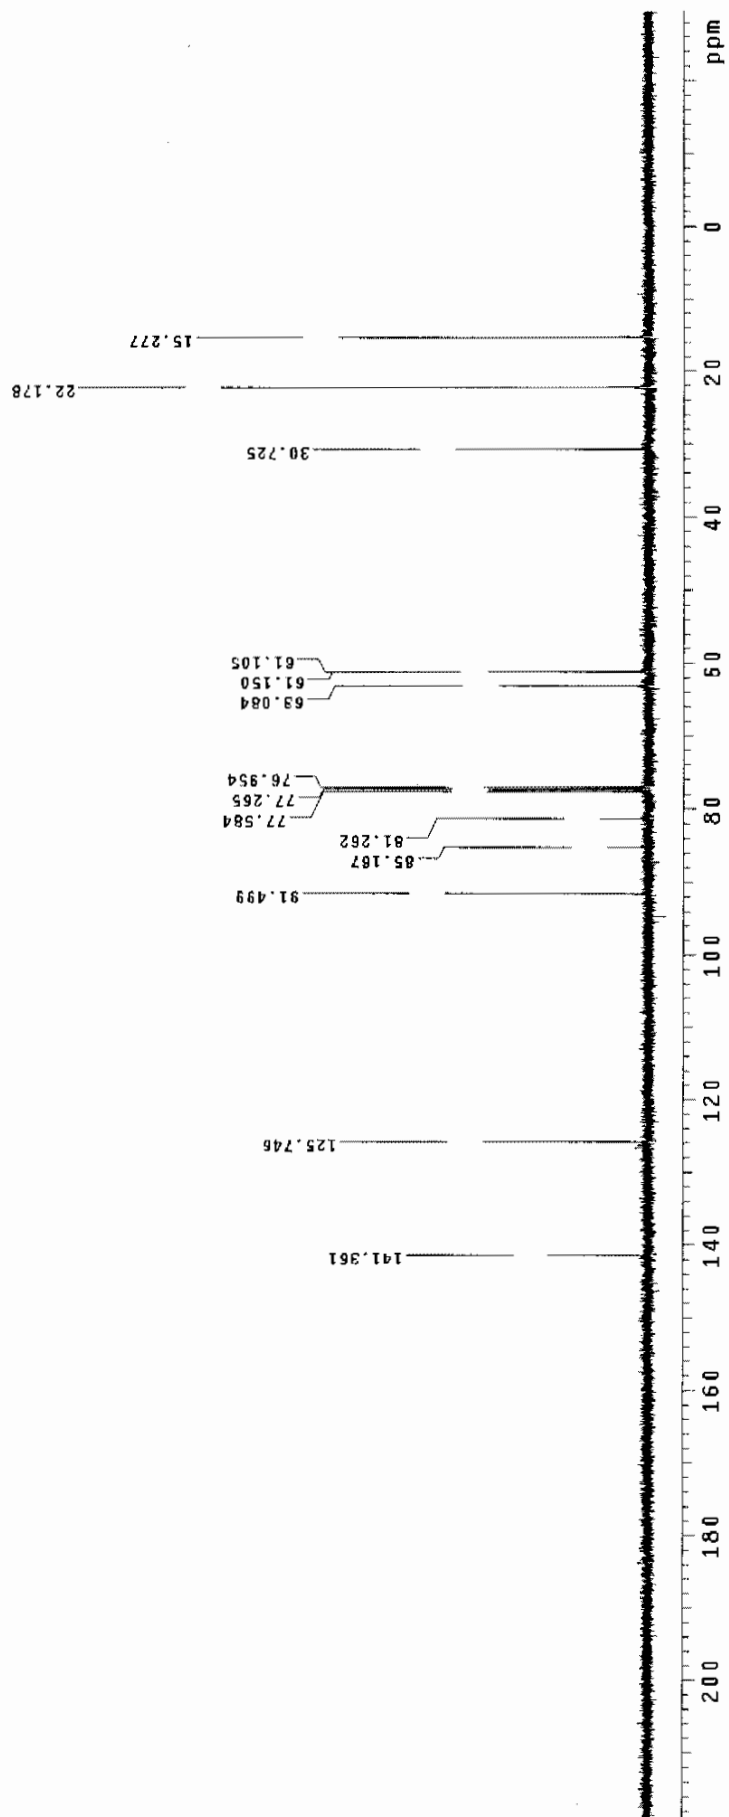

<sup>1</sup>H NMR, 400 MHz, CDCl<sub>3</sub>

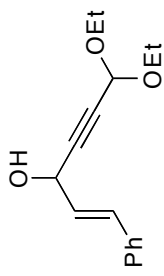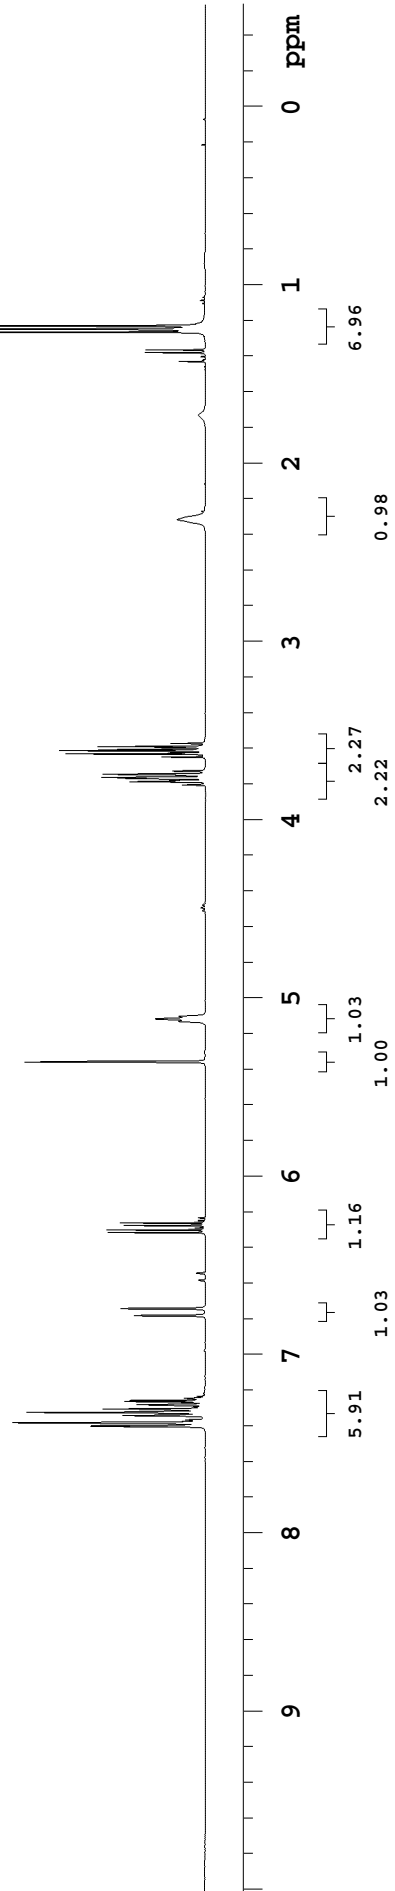



<sup>1</sup>H NMR, 500 MHz, CDCl<sub>3</sub>

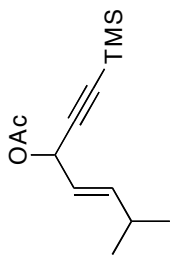

S 70

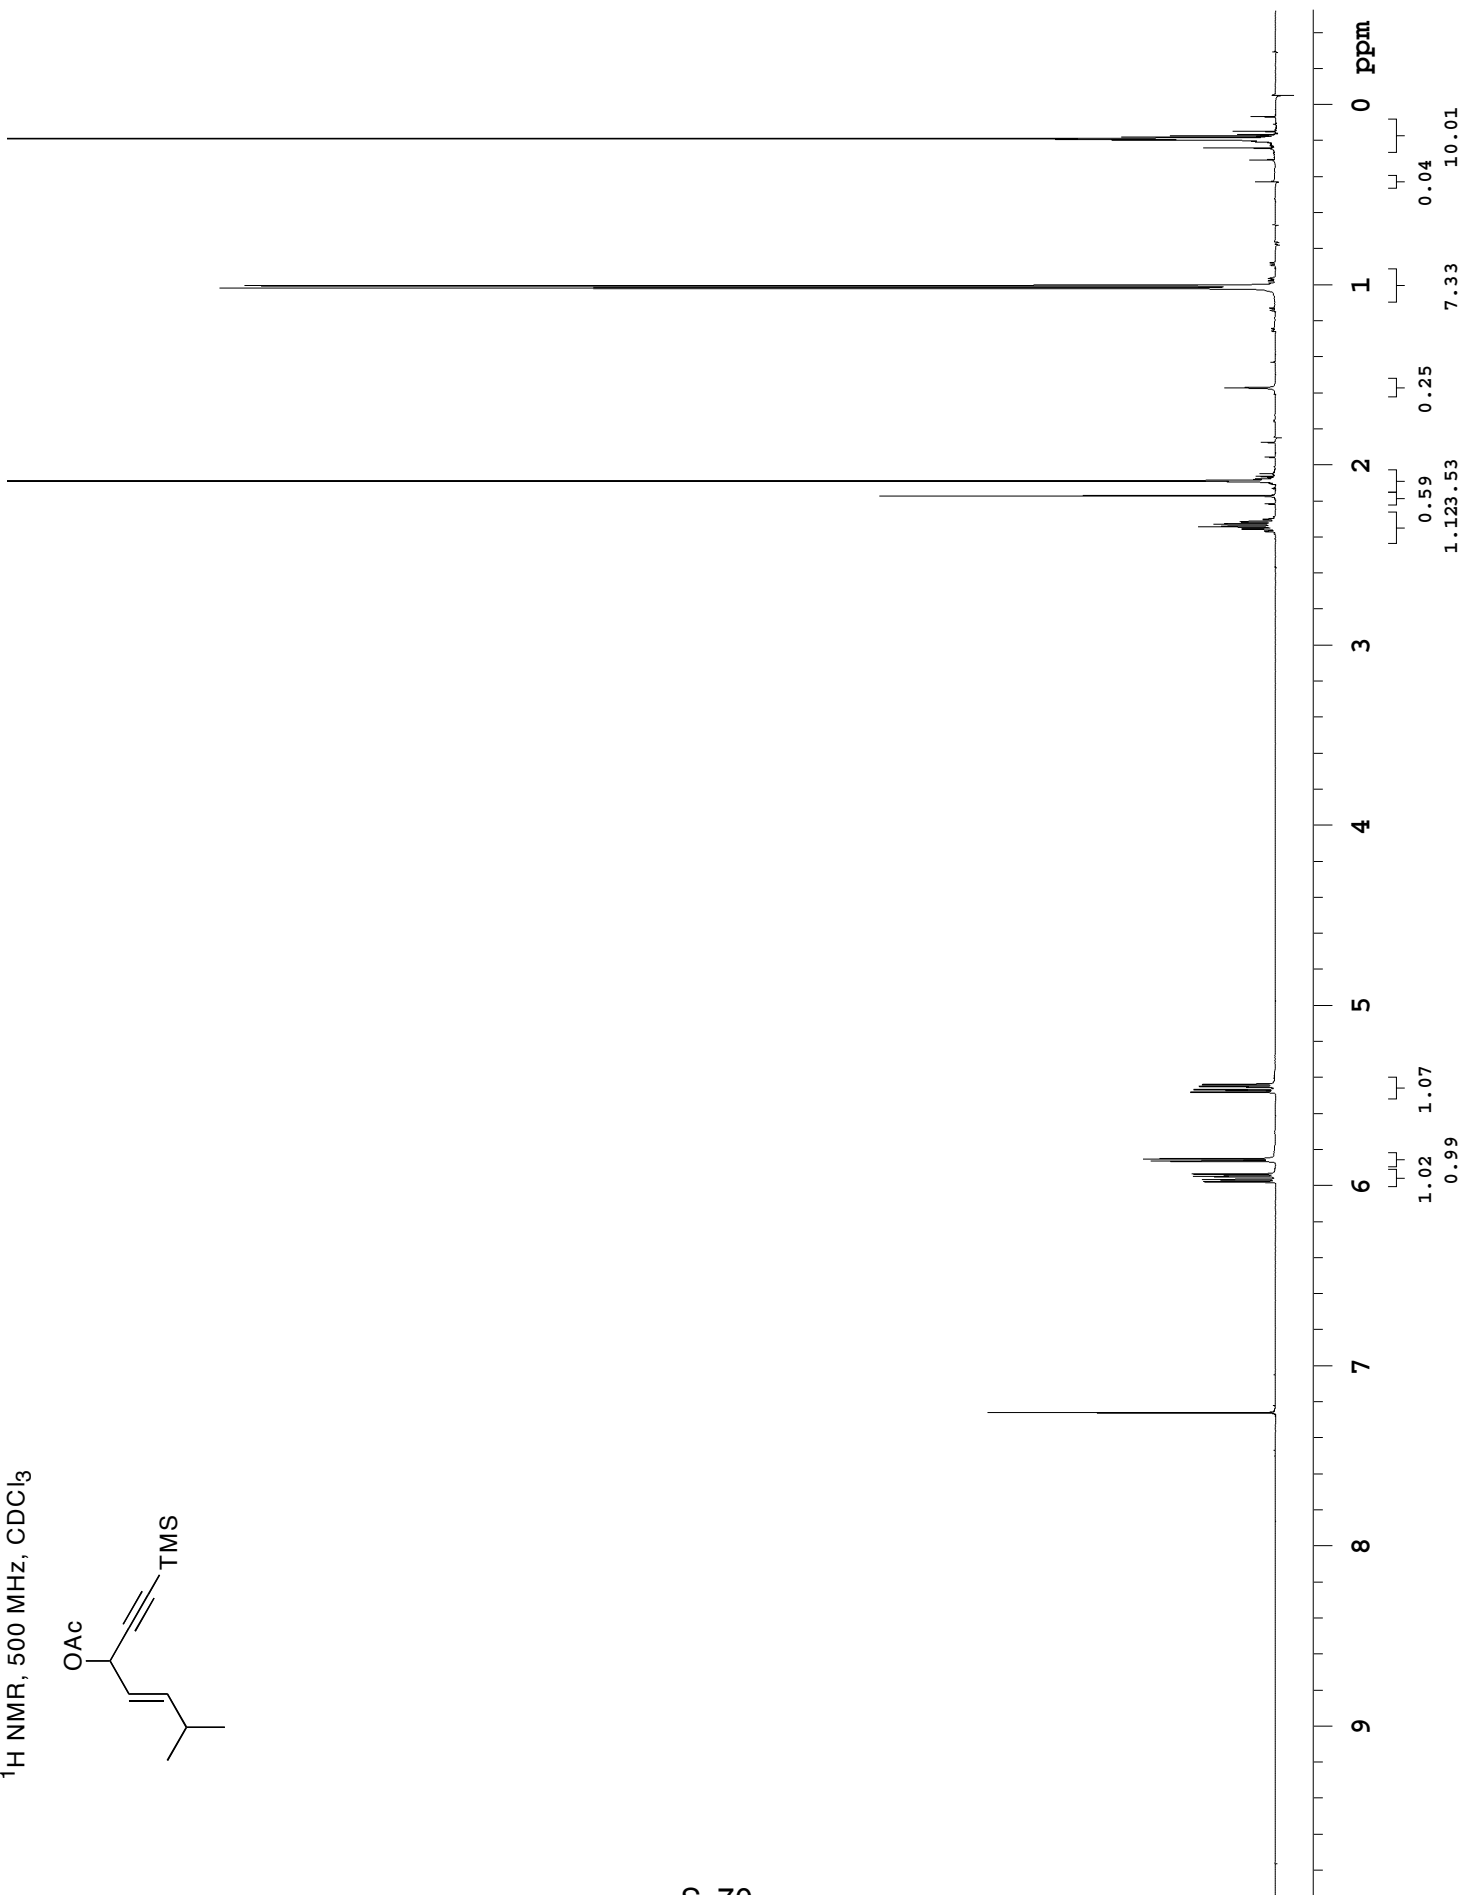

<sup>13</sup>C NMR, 126 MHz, CDCl<sub>3</sub>

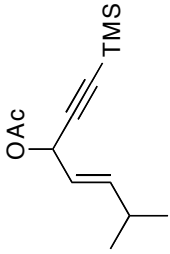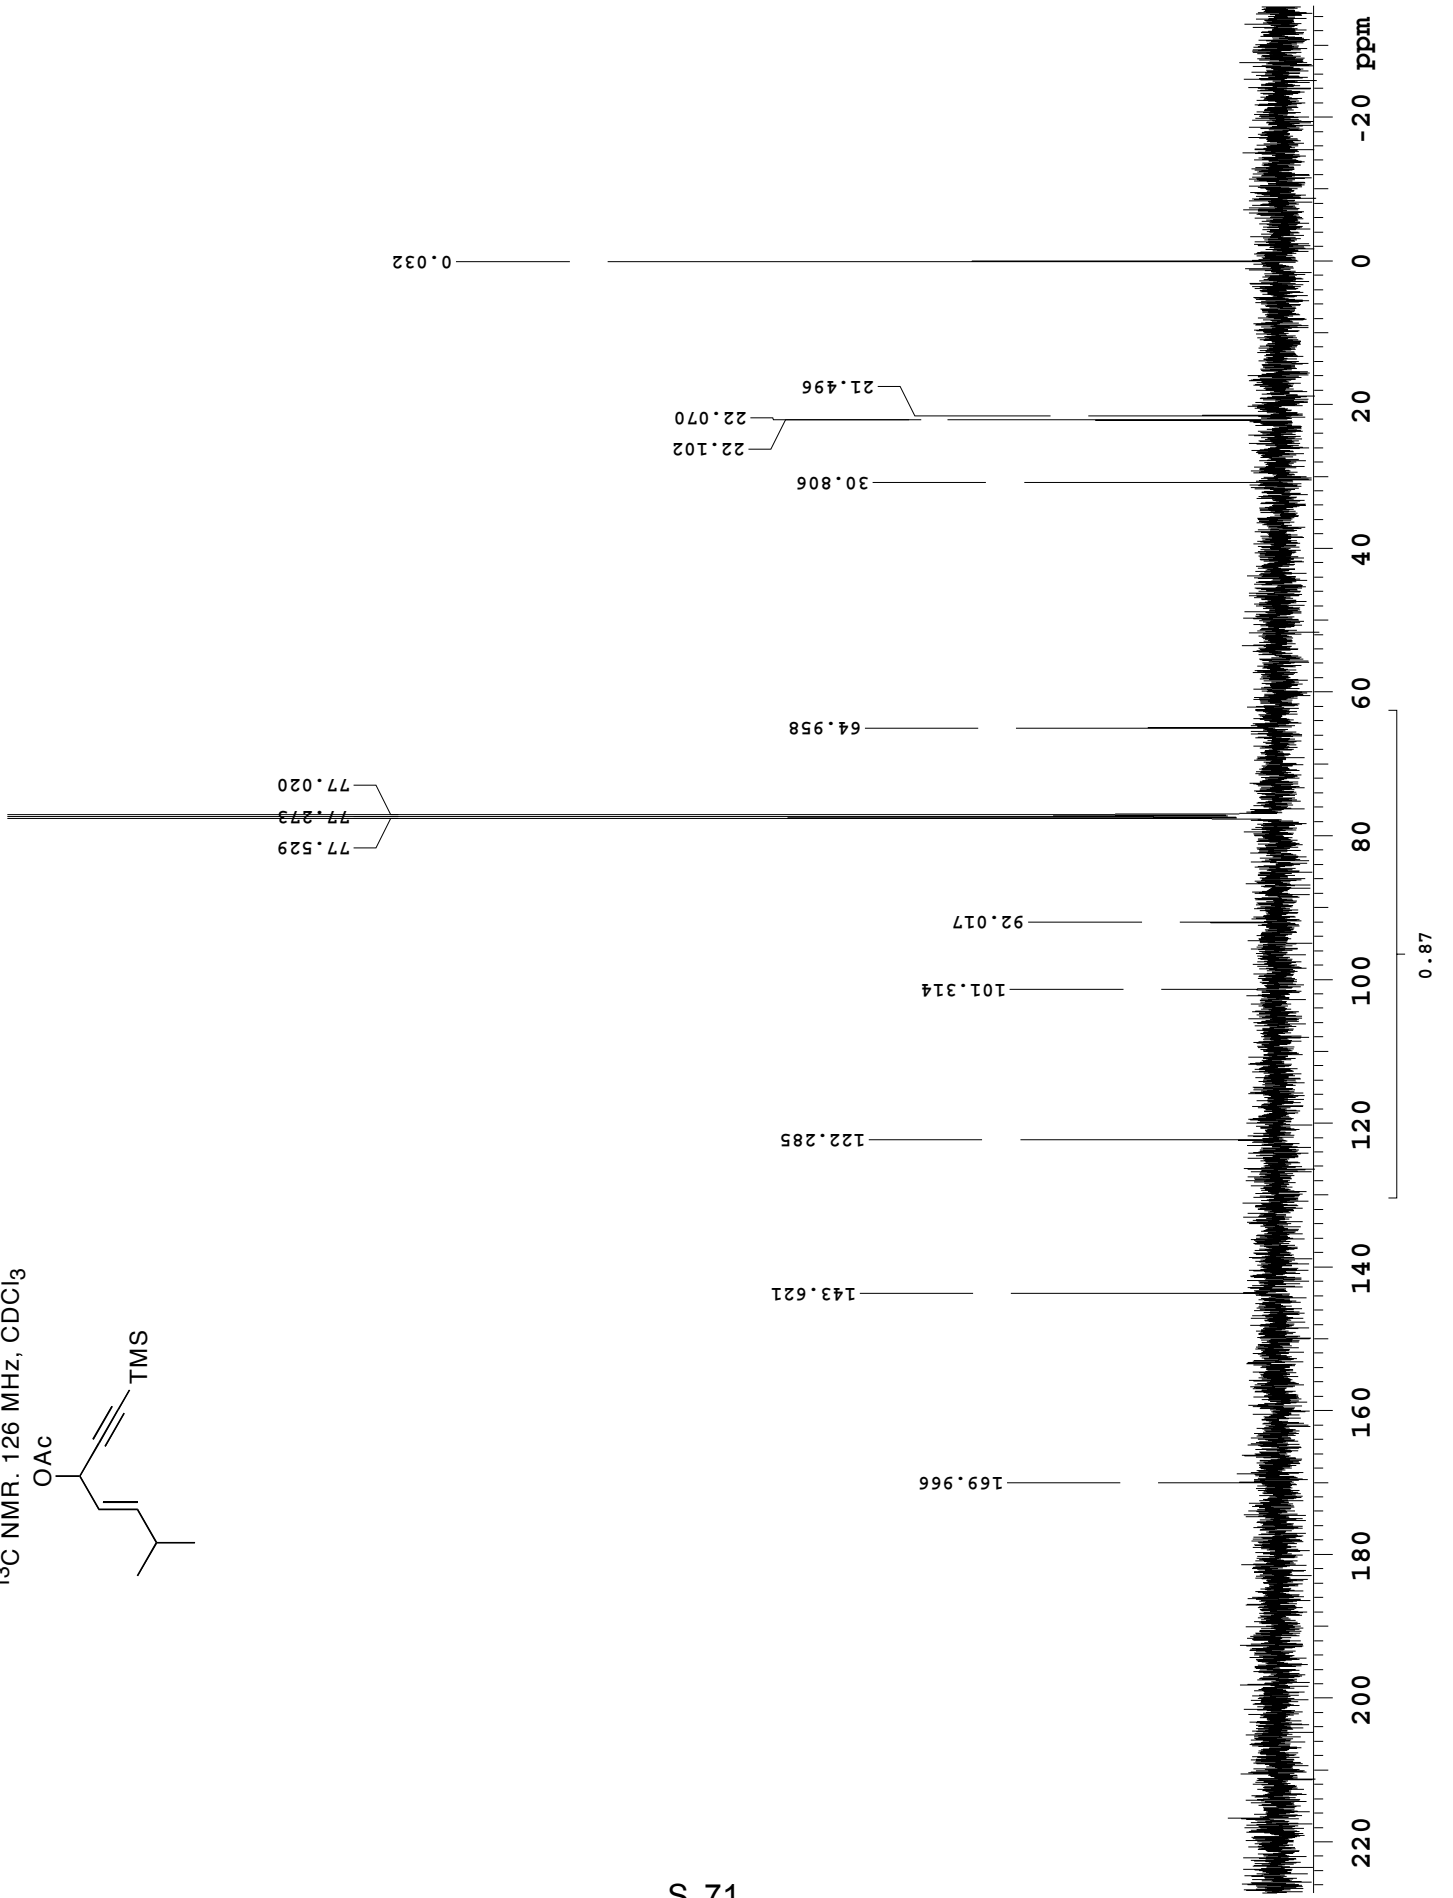

<sup>1</sup>H NMR. 400 MHz, CDCl<sub>3</sub>

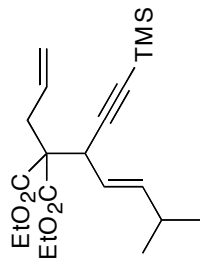

S 72

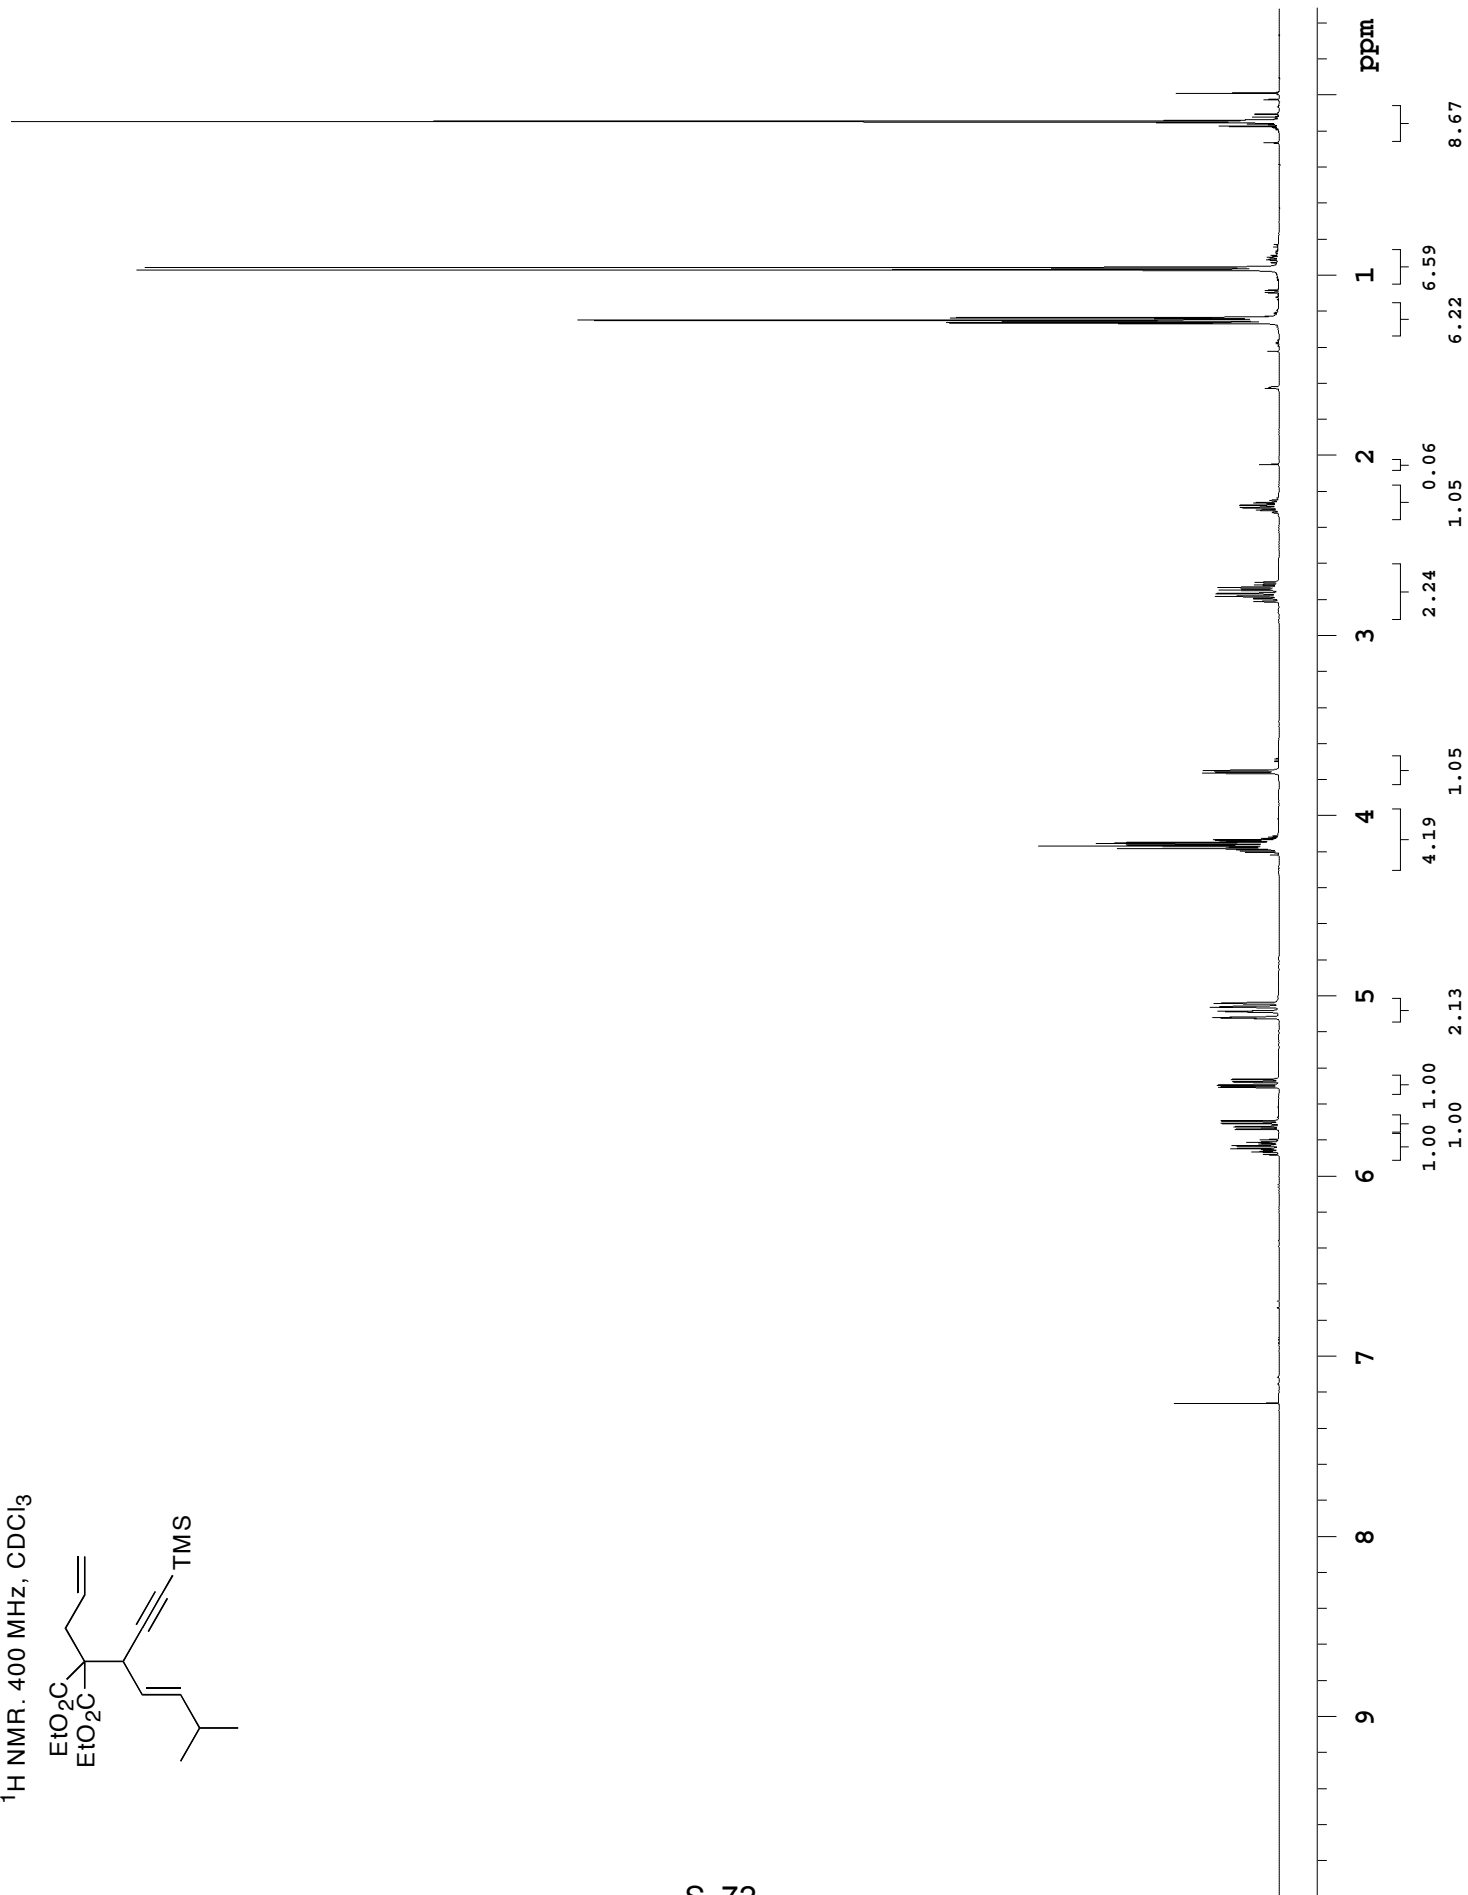



<sup>13</sup>C NMR, 101 MHz, CDCl<sub>3</sub>

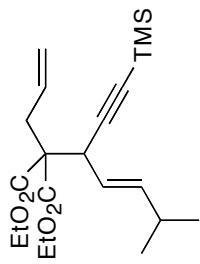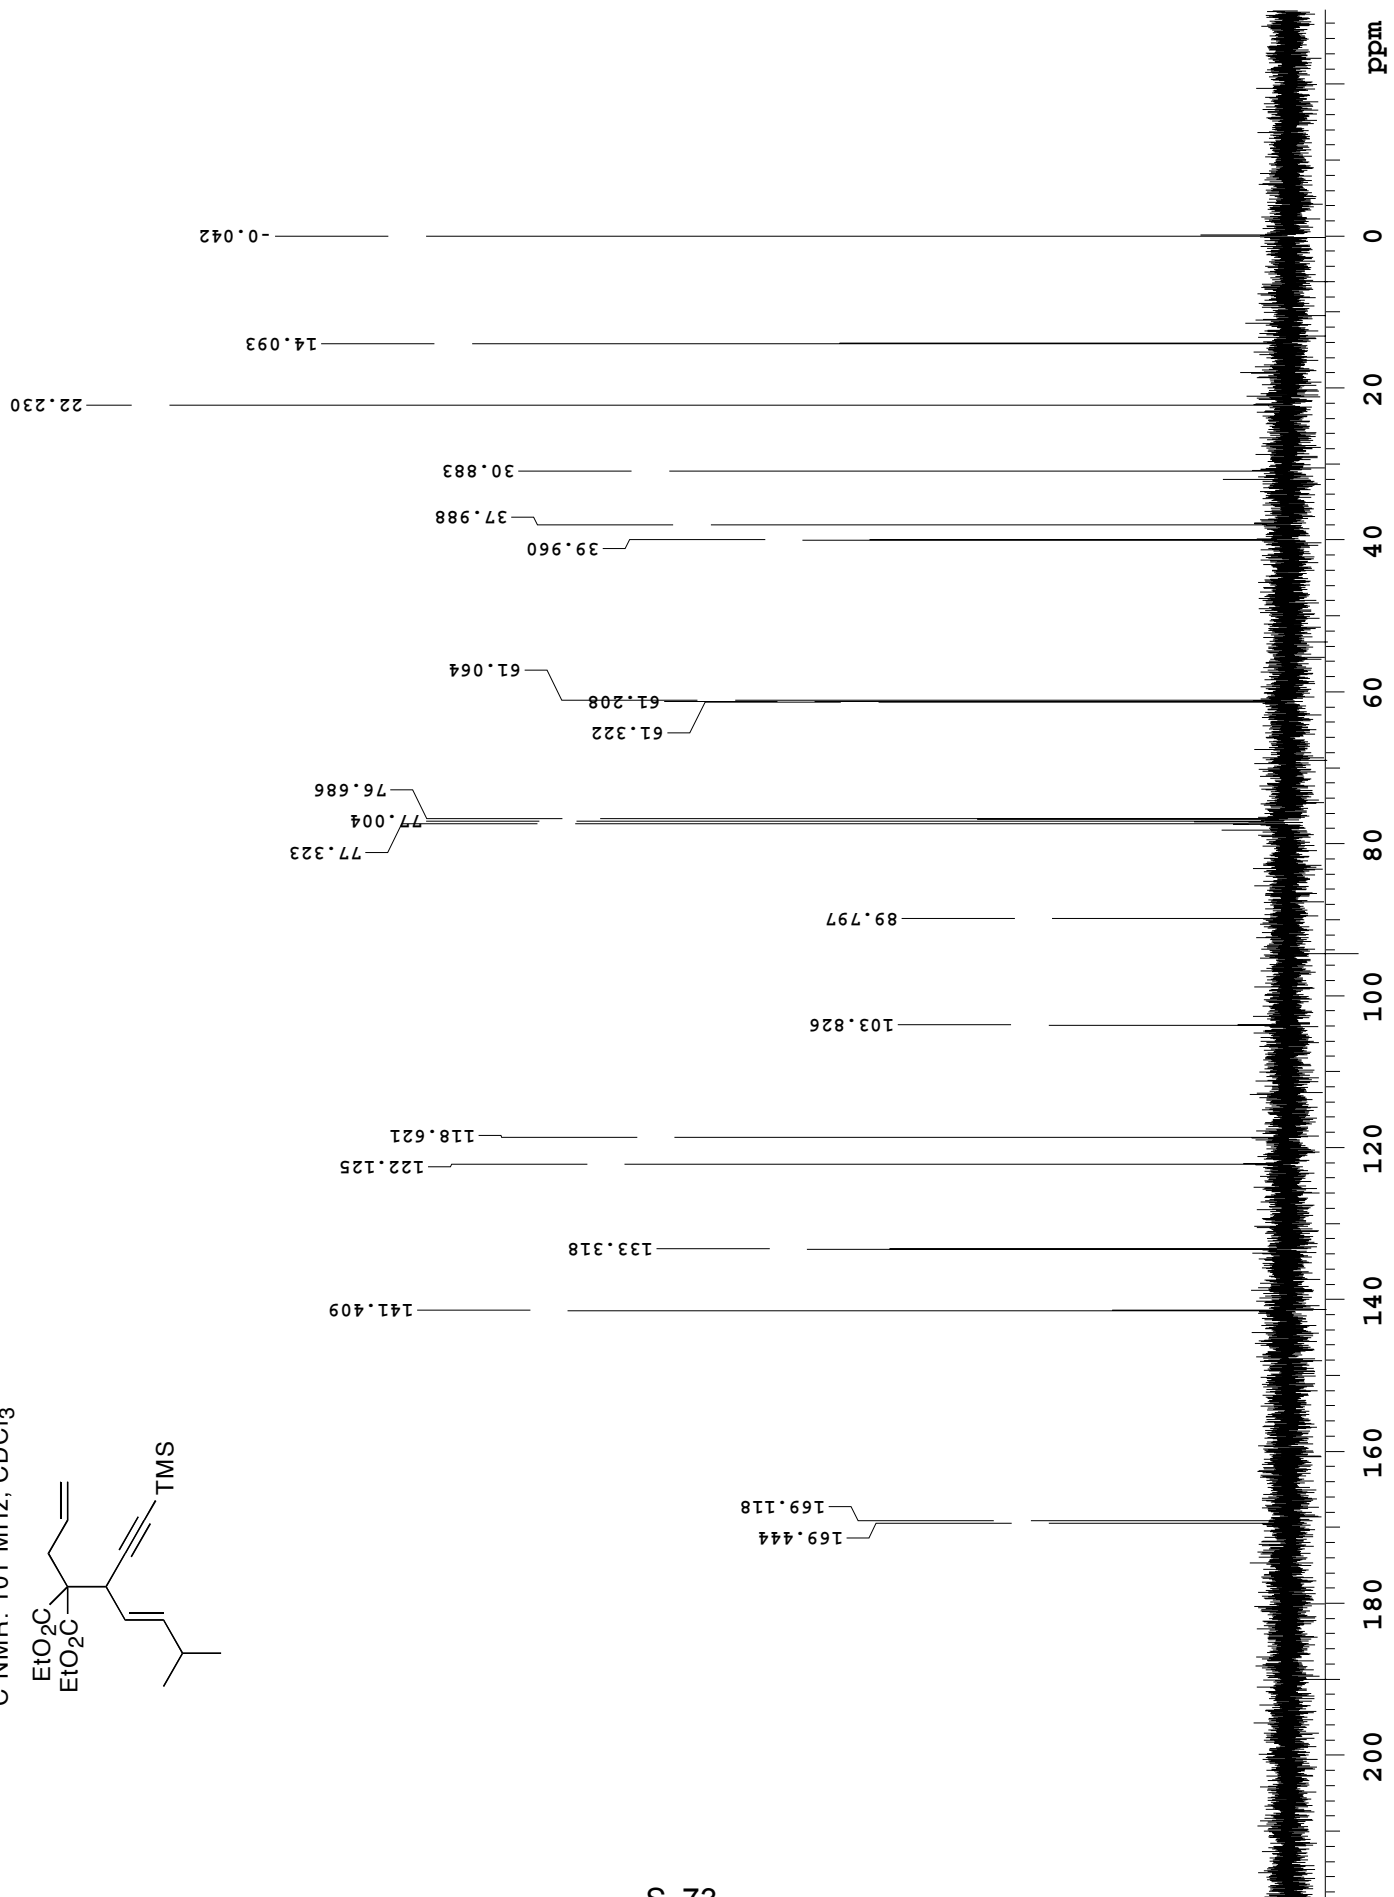

$^1\text{H}$  NMR. 400 MHz,  $\text{CDCl}_3$

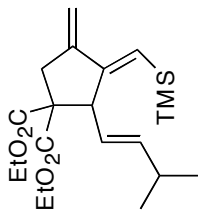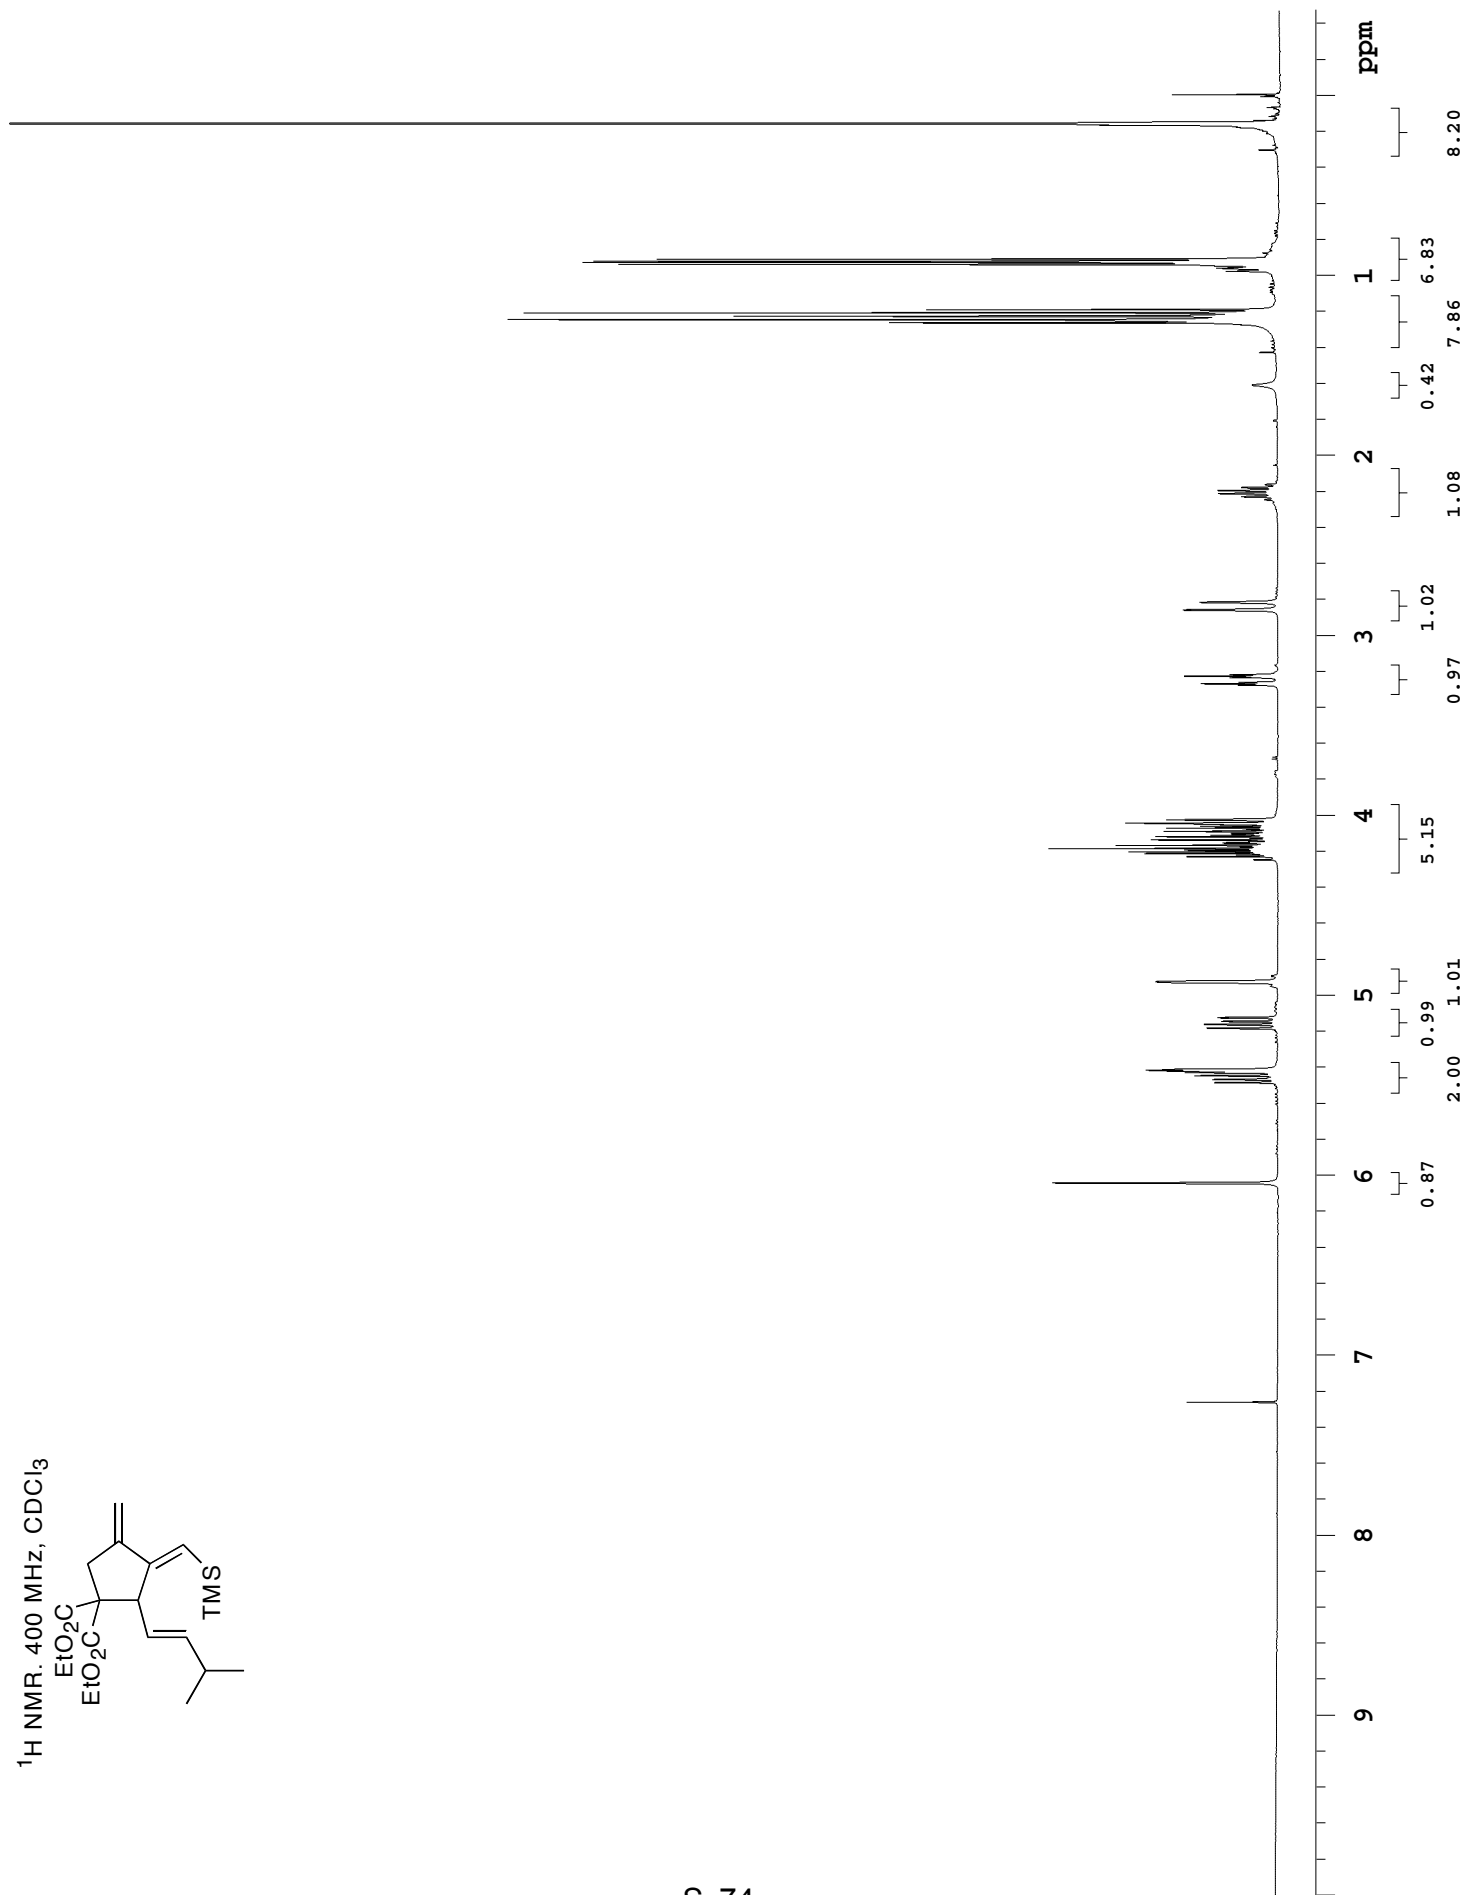

<sup>13</sup>C NMR, 101 MHz, CDCl<sub>3</sub>

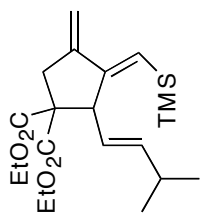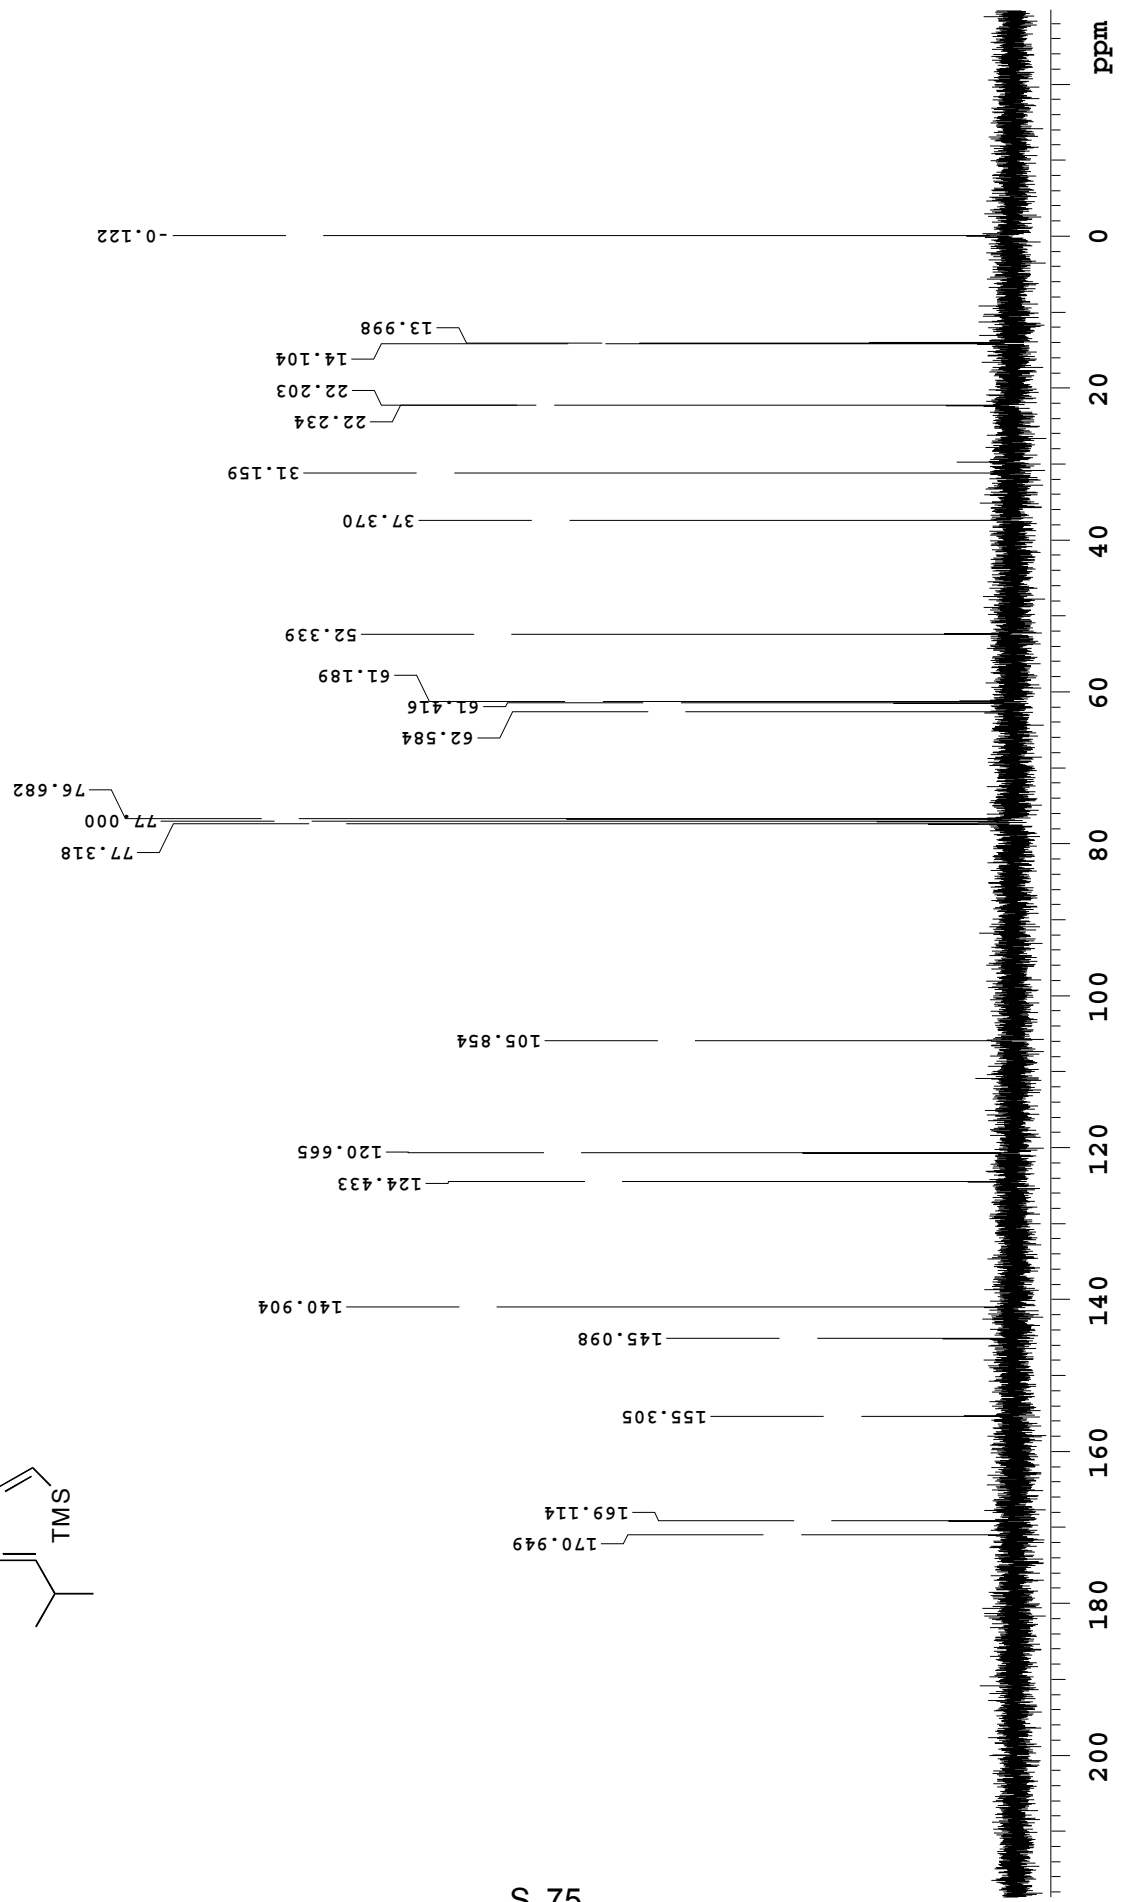

Supplement: NIHMS63214-supplement-2si20051111_07.pdf [file NIHMS63214-supplement-2si20051111_07.pdf]
